# Supplementary material for: The association between sleep duration, sleep quality, and food consumption in adolescents: A cross-sectional study using the Korea Youth Risk Behavior Web-based Survey
Source: PubMed Central journal article supplement — BMJ Open. 2018 Jul 24;8(7):e022848. doi: 10.1136/bmjopen-2018-022848 (PMC6059317; doi:10.1136/bmjopen-2018-022848), 2018-07-24
Supplement: bmjopen-2018-022848.draft_revisions.pdf [file bmjopen-2018-022848.draft_revisions.pdf]

# BMJ Open

BMJ Open is committed to open peer review. As part of this commitment we make the peer review history of every article we publish publicly available.

When an article is published we post the peer reviewers' comments and the authors' responses online. We also post the versions of the paper that were used during peer review. These are the versions that the peer review comments apply to.

The versions of the paper that follow are the versions that were submitted during the peer review process. They are not the versions of record or the final published versions. They should not be cited or distributed as the published version of this manuscript.

BMJ Open is an open access journal and the full, final, typeset and author-corrected version of record of the manuscript is available on our site with no access controls, subscription charges or pay-per-view fees (<http://bmjopen.bmj.com>).

If you have any questions on BMJ Open's open peer review process please email [info.bmjopen@bmj.com](mailto:info.bmjopen@bmj.com)

# BMJ Open

## Sleep duration and quality is associated with food consumption in adolescents

|                               |                                                                                                                                                                                                                                                                                                                                                                                                                                                                                                                                                                                                                                                                                                                                                                                                                               |
|-------------------------------|-------------------------------------------------------------------------------------------------------------------------------------------------------------------------------------------------------------------------------------------------------------------------------------------------------------------------------------------------------------------------------------------------------------------------------------------------------------------------------------------------------------------------------------------------------------------------------------------------------------------------------------------------------------------------------------------------------------------------------------------------------------------------------------------------------------------------------|
| Journal:                      | <i>BMJ Open</i>                                                                                                                                                                                                                                                                                                                                                                                                                                                                                                                                                                                                                                                                                                                                                                                                               |
| Manuscript ID                 | bmjopen-2018-022848                                                                                                                                                                                                                                                                                                                                                                                                                                                                                                                                                                                                                                                                                                                                                                                                           |
| Article Type:                 | Research                                                                                                                                                                                                                                                                                                                                                                                                                                                                                                                                                                                                                                                                                                                                                                                                                      |
| Date Submitted by the Author: | 13-Mar-2018                                                                                                                                                                                                                                                                                                                                                                                                                                                                                                                                                                                                                                                                                                                                                                                                                   |
| Complete List of Authors:     | Min, Chanyang; Hallym Data Science Laboratory, Hallym University College of Medicine; Graduate School of Public Health, Seoul National University<br>Kim, Hyung-Jong; Department of Otorhinolaryngology-Head & Neck Surgery, Hallym University College of Medicine<br>Park, Il-Seok; Department of Otorhinolaryngology-Head & Neck Surgery, Hallym University College of Medicine<br>Park, Bumjung; Department of Otorhinolaryngology-Head & Neck Surgery<br>Kim, Jin-Hwan; Department of Otorhinolaryngology-Head & Neck Surgery, Hallym University College of Medicine<br>Sim, Songyong; Department of statistics, Hallym University<br>Choi, Hyo Geun; Hallym Data Science Laboratory, Hallym University College of Medicine; Department of Otorhinolaryngology-Head & Neck Surgery, Hallym University College of Medicine |
| Keywords:                     | NUTRITION & DIETETICS, PUBLIC HEALTH, PREVENTIVE MEDICINE                                                                                                                                                                                                                                                                                                                                                                                                                                                                                                                                                                                                                                                                                                                                                                     |
|                               |                                                                                                                                                                                                                                                                                                                                                                                                                                                                                                                                                                                                                                                                                                                                                                                                                               |

SCHOLARONE™  
Manuscripts

Only

# Sleep duration and quality is associated with food consumption in adolescents

Chanyang Min<sup>1,2</sup>, Hyung-Jong Kim<sup>3</sup>, Il-Seok Park<sup>4</sup>, Bumjung Park<sup>3</sup>, Jin-Hwan Kim<sup>5</sup>,  
Songyong Sim<sup>6\*</sup>, Hyo Geun Choi<sup>1,3\*</sup>

<sup>1</sup>Hallym Data Science Laboratory, Hallym University College of Medicine, Anyang, Korea

<sup>2</sup>Graduate School of Public Health, Seoul National University, Seoul, Korea

<sup>3</sup>Department of Otorhinolaryngology-Head & Neck Surgery, Hallym University College of  
Medicine, Anyang, Korea

<sup>4</sup>Department of Otorhinolaryngology-Head & Neck Surgery, Hallym University College of  
Medicine, Dongtan, Korea

<sup>5</sup>Department of Otorhinolaryngology-Head & Neck Surgery, Hallym University College of  
Medicine, Seoul, Korea

<sup>6</sup>Department of statistics, Hallym University, Chuncheon, Korea.

Word count: 3,038

\* Corresponding author

Name: Hyo Geun Choi

1  
2  
3  
4 21 Department of Otorhinolaryngology-Head & Neck Surgery, Hallym University Sacred Heart  
5  
6 22 Hospital, 22, Gwanpyeong-ro 170beon-gil, Dongan-gu, Anyang-si, Gyeonggi-do, 14068  
7  
8 23 Republic of Korea  
9  
10 24 Tel: 82-31-380-3849  
11  
12 25 Fax: 82-31-386-3860  
13  
14 26 Email: pupen@naver.com  
15  
16  
17  
18

19 28 \*Songyong Sim and Hyo Geun Choi are equally contributed in this study  
20  
21  
22  
23  
24  
25  
26  
27  
28  
29  
30  
31  
32  
33  
34  
35  
36  
37  
38  
39  
40  
41  
42  
43  
44  
45  
46  
47  
48  
49  
50  
51  
52  
53  
54

1  
2  
3  
4 30 **ABSTRACT**

5  
6  
7 31 Objective: This study examined the relationship between sleep duration and quality and food  
8  
9 32 consumption among adolescents.

10  
11 33 Design: Cross-sectional study.

12  
13  
14 34 Setting: Data from the 2014 and 2015 Korea Youth Risk Behavior Web-based Survey were  
15  
16 35 used.

17  
18  
19 36 Participants: Participants of 12-18 years old (n = 118,462 (59,431 males, 59,031 females))  
20  
21 37 were selected.

22  
23  
24 38 Primary and secondary outcome measures: Sleep duration, sleep quality and the frequencies  
25  
26 39 of fruits, soda, soft drinks, fast food, instant noodle, confectionaries, vegetables, and milk  
27  
28 40 consumption.

29  
30  
31 41 Results: Short sleep durations (< 6 h) were associated with higher soft drinks and  
32  
33 42 confectionaries intake than longer sleep durations (adjusted odds ratios (AORs) [95%  
34  
35 43 confidence intervals (CIs)] for  $\geq 5$  times a week for soft drinks, 1.73 [1.57-1.91] and  
36  
37 44 confectionaries, 1.32 [1.20-1.46];  $P < 0.001$ ). Poor sleep quality, with 7-8 h of sleep, was  
38  
39 45 associated with a lower intake of fruits, vegetables and milk (AORs [95% CIs] for  $\geq 5$  times a  
40  
41 46 week for fruits, 0.71 [0.65-0.77]; vegetables, 0.66 [0.58-0.75]; and milk, 0.80 [0.74-0.86];  
42  
43 47 each  $P < 0.001$ ), and higher intake of soda, soft drinks, fast food, instant noodle and  
44  
45 48 confectionaries (AORs [95% CIs] for  $\geq 5$  times a week for soda, 1.55 [1.40-1.70]; soft drinks,  
46  
47 49 1.58 [1.43-1.73]; fast food, 1.97 [1.65-2.35]; instant noodle, 1.55 [1.37-1.76]; and  
48  
49 50 confectionaries, 1.30 [1.18-1.43]; each  $P < 0.001$ ) than was good sleep quality of the same  
50  
51 51 duration.

1  
2  
3  
4 52 Conclusion: Short sleep durations and poor sleep quality might be associated with higher  
5  
6 53 consumption of unhealthier foods, such as sugar-sweetened beverages, fast food, instant  
7  
8 54 noodle and confectionaries, and associated with lower consumption of fruits, vegetables and  
9  
10 55 milk.

11  
12  
13 56 Key words: sleep duration, sleep quality, food consumption, food frequency, sugar-sweetened  
14  
15 57 beverages, fast food, fruits, vegetables, adolescents, Korean  
16  
17

18 58  
19  
20

21 59  
22  
23  
24  
25  
26  
27  
28  
29  
30  
31  
32  
33  
34  
35  
36  
37  
38  
39  
40  
41  
42  
43  
44  
45  
46  
47  
48  
49  
50  
51  
52  
53  
54

1  
2  
3  
4 60 **STRENGTHS AND LIMITATIONS OF THIS STUDY**

- 5  
6  
7 61 ♦ Our study was conducted on a representative population of Korean adolescents.  
8  
9 62 ♦ We considered numerous socio-economic status variables as confounding factors to  
10  
11 63 investigate the independent relationship between sleep status and food consumption.  
12  
13  
14 64 ♦ We considered not only sleep duration but also sleep quality in explaining sleep  
15  
16 65 status.  
17  
18  
19 66 ♦ Our study was based on secondary data and it has some limitations in providing  
20  
21 67 specific information.  
22  
23  
24 68 ♦ Because the data were collected based on a self-reported questionnaire, the precision  
25  
26 69 of the information may be low.  
27  
28

29 70  
30  
31  
32  
33  
34  
35  
36  
37  
38  
39  
40  
41  
42  
43  
44  
45  
46  
47  
48  
49  
50  
51  
52  
53  
54

## 71 INTRODUCTION

72 Sufficient sleep in adolescents is important to maintain good health status and school  
73 performance. According to the National Sleep Foundation <sup>1</sup>, approximately 8 to 10 hours of  
74 sleep a night is best for adolescents. However, sleep durations for adolescents have been  
75 declining. <sup>2</sup> The reasons for decreasing sleep durations and reduced sleep quality among  
76 adolescents have been suggested to be associated with increased use of the internet and social  
77 media, and earlier school start times. <sup>3 4</sup> Inadequate sleep durations or quality could lead to  
78 poor school performance, physical health problems such as atopic conditions, headaches,  
79 mental health problems, and unhealthy behaviors. <sup>4-7</sup>

80 One of the outcomes of sleep deprivation among adolescents is obesity <sup>8</sup>, which has  
81 become a serious public health problem worldwide. <sup>9</sup> The fundamental factor leading to  
82 obesity is an energy imbalance between the calories consumed and the calories expended <sup>10</sup>;  
83 therefore, dietary factors are closely related to the prevalence of obesity <sup>11 12</sup> and are  
84 considered as a potential link between sleep deprivation and obesity in adolescents.  
85 According to previous studies, the intake of fruits, vegetables and milk have a positive  
86 association, and the intake of sweets, snacks and fast food a negative association with sleep  
87 duration. <sup>13-15</sup> In short, adolescents who get less sleep may be more likely to consume more  
88 calories in the form of fast foods, sweets and snacks, and fewer micronutrients than  
89 adolescents who get more sleep. Previous studies demonstrated that one of the possible  
90 reasons for sleep deprivation in association with the consumption of higher energy foods  
91 might be changes in hormones such as decreased leptin and increased ghrelin levels, which  
92 can lead to an increase in appetite. <sup>16 17</sup> In summary, sleep deprivation in adolescents might  
93 affect dietary habits as a factor of health problems including obesity.



1  
2  
3  
4 94 In Korea, the prevalence of childhood obesity in males and females was 15.3% and 11.1%  
5  
6 95 in 2016, respectively and it increased steadily since 2010.<sup>18</sup> Lee, who performed a study  
7  
8 96 using the Korea Youth Risk Behavior Web-based Survey (KYRBWS), reported that < 7 h of  
9  
10 97 sleep per night in high school students was associated with increased cracker consumption.<sup>19</sup>  
11  
12

13 98 Meanwhile, studies of sleep deprivation should consider not only sleep duration but also  
14  
15 99 sleep quality. However, few studies have investigated the relationship between sleep duration,  
16  
17 100 along with sleep quality, and the intake of various foods while also adjusting for the  
18  
19 101 numerous confounding factors among adolescents in population-based datasets. Lee utilized  
20  
21 102 KYRBWS data which is population-based datasets with containing numerous variables, she  
22  
23 103 did not consider the sleep quality.<sup>19</sup> The aim of our study was to identify the associations  
24  
25 104 between sleep duration and quality and food intake among adolescents by using KYRBWS  
26  
27 105 datasets. We utilized the data of the participants' level of recovery from fatigue after sleeping  
28  
29 106 as sleep quality. We obtained reliable results for assessing the associations between sleep  
30  
31 107 duration and quality, and the consumption of each of food type.  
32  
33  
34

35 108

## 38 109 **MATERIALS AND METHODS**

### 41 110 **Data collection**

42  
43 111 The Institutional Review Board (IRB) of the Centers for Disease Control and Prevention of  
44  
45 112 Korea (KCDC) approved this study (2014-06EXP-02-P-A). Written, informed consent was  
46  
47 113 obtained from each participant prior to the survey. Because this web-based survey was  
48  
49 114 performed at schools and included a large number of participants, informed consent from  
50  
51 115 their parents was exempted. This consent procedure was approved by the IRB of KCDC.  
52  
53  
54

1  
2  
3  
4 116 This was a cross-sectional study using data from the KYRBWS, covering only Korea and  
5  
6 117 using statistical methods based on a designed sampling method and adjusted, weighted values.  
7  
8 118 The results from the KYRBWS conducted in 2014 and 2015 were analyzed. The data were  
9  
10 119 collected by the KCDC.  
11  
12  
13  
14  
15

## 16 121 **Public Involvement**

17  
18 122 The survey consists of 125 questions assessing demographic characteristics and health-related  
19  
20 123 behaviors. Korean adolescents from the 7<sup>th</sup> through 12<sup>th</sup> grade completed the self-  
21  
22 124 administered questionnaire voluntarily and anonymously. Using 43 regions (considering  
23  
24 125 administrative districts, geographic accessibility, the number of schools, and population size)  
25  
26 126 and the school participants attended, the mother population was stratified into 129 levels to  
27  
28 127 identify the sample distribution. Groups were then selected using stratified, two-stage  
29  
30 128 (schools and classes) clustered sampling based on data from the Education Ministry.  
31  
32 129 Sampling was weighted by statisticians, who performed a post-stratification step and  
33  
34 130 considered non-response rates and extreme values. Detailed methods are described at the  
35  
36 131 KYRBWS website (<https://yhs.cdc.go.kr/new/pages/main.asp>).  
37  
38  
39  
40

41 132 Of a total of 140,103 participants, we excluded the following participants from analysis in  
42  
43 133 this study; participants who slept less than 3 h or more than 12 h per night or who had no  
44  
45 134 sleep records (18,594 participants); participants who did not give their age (403 participants);  
46  
47 135 and participants without height or weight data (2,644 participants). Finally, 118,462  
48  
49 136 participants (59,431 males; 59,031 females; 12 to 18 years old) were included in this study  
50  
51 137 (Figure 1).  
52  
53  
54

138

**139 Sleep duration and quality**

140 The times at which participants fall asleep and wake up were recorded to within 10 min. The  
141 participants were asked the time they fall asleep and the time they wake up for the 7 most  
142 recent days classified into weekdays and weekends. Sleep duration was calculated by  
143 subtracting the time they fall asleep from the time they wake up. The mean daily sleep  
144 duration was calculated by adding weekday and weekend sleep durations with weights of 5/7  
145 and 2/7, respectively. Sleep duration was divided into five groups: < 6 h (6(-) h), ≥ 6 h and <  
146 7 h (6 h), ≥ 7 h and < 8 h (7 h), ≥ 8 h and < 9 h (8 h), and ≥ 9 h (9+ h). The participants were  
147 asked about their recovery from fatigue after sleeping for the 7 most recent days (quality of  
148 sleep). The answer options were very good, good, moderate, poor, and very poor. We  
149 regrouped answers into three groups of sleep quality to simplify the categories: good (very  
150 good and good), moderate, and poor (poor and very poor). We analyzed the association  
151 between sleep quality and food consumption only in the 7 h and 8 h groups as sleep duration  
152 was closely related to its quality (S1 Table).

153

**154 Food intake frequency**

155 The KCDC collected the participants' certain food intake frequencies in the 7 most recent  
156 days. The foods were fruits (not fruit juice), soda, soft drinks (including sports drinks, coffee-  
157 based beverages, and fruit drinks; excluding soda), fast food (such as pizza, hamburgers, or  
158 chicken), instant noodle, confectionaries, vegetables and milk. The data were divided into 4  
159 groups: ≥ 5 times a week, 3-4 times a week, 1-2 times a week, and 0 time a week.

1  
2  
3  
4 1605  
6  
7 161 **Health examination and socio-economic status**

8  
9 162 The participants were asked their weight (kg) and height (cm). Obesity levels were  
10  
11 163 categorized into 4 groups according to the Centers for Disease Control and Prevention  
12  
13 164 guidelines regarding body mass index (BMI, kg/m<sup>2</sup>) for children and teens <sup>20</sup> as follows:  
14  
15 165 obese,  $\geq 95^{\text{th}}$  percentile; overweight,  $\geq 85^{\text{th}}$  percentile and  $< 95^{\text{th}}$  percentile; healthy weight,  $\geq$   
16  
17 166  $5^{\text{th}}$  percentile and  $< 85^{\text{th}}$  percentile; and underweight,  $< 5^{\text{th}}$  percentile. The region of residence  
18  
19 167 was divided into 3 groups by administrative district: large city, small city, and rural area.  
20  
21 168 Subjective self-assessments of health were divided into 5 groups, from very good to very bad.  
22  
23 169 The stress level of participants was divided into 5 groups: severe, moderate, mild, a little, and  
24  
25 170 no stress. Self-reported economic level was grouped into 5 levels, from the highest to lowest.  
26  
27 171 Parent educational level was divided into 4 groups: graduated college or higher, graduated  
28  
29 172 high school, graduated middle school or below, unknown, and no parents. The participants  
30  
31 173 who did not know the educational level of their parents or who had no parents were not  
32  
33 174 excluded as this could have increased the number missing values for participants of relatively  
34  
35 175 lower economic levels.  
36  
37  
38  
39

40 176

41  
42  
43 177 **Statistical Analysis**

44  
45 178 Differences in the general characteristics according to sleep duration were calculated using  
46  
47 179 linear regression analysis with complex sampling for age. The rate differences in relation to  
48  
49 180 sex, region of residence, economic level, educational level of parents, stress level, food  
50  
51 181 consumption, and quality of sleep were compared using chi-square tests with Rao-Scott  
52  
53  
54

1  
2  
3  
4 182 corrections.

5  
6 183 Adjusted odd ratios (AORs) for sleep duration in relation to food consumption were  
7  
8 184 calculated using multinomial logistic regression analysis with complex sampling for adjusted  
9  
10 185 covariates (age, sex, obesity, region of residence, stress level, economic level, and  
11  
12 186 educational level of parents).

13  
14  
15 187 AORs for sleep quality in relation to food consumption were calculated using  
16  
17 188 multinomial logistic regression analysis with complex sampling for adjusted covariates in the  
18  
19 189 7 h and 8 h groups.

20  
21  
22 190 Two-tailed analyses were conducted. P-values lower than 0.05 were considered to  
23  
24 191 indicate significance, and 95% confidence intervals (CIs) were calculated. The weighted  
25  
26 192 values recommended by the KYRBWS were applied, and all results are presented as  
27  
28 193 weighted values. The results were analyzed using SPSS ver. 21.0 (IBM, Armonk, NY, USA).

29  
30  
31  
32 194

33  
34  
35 195 **RESULTS**

36  
37 196 Analysis of the general characteristics of the study participants shows that an older age, being  
38  
39 197 female, reporting being healthy, living in a large city, feeling severe or moderate stress, being  
40  
41 198 at a lower economic level, and having higher parental educational levels were associated with  
42  
43 199 shorter sleep durations (all P values < 0.001, Table 1).

44  
45  
46  
47 200

48  
49 201 **Table 1. General characteristics of participants according to sleep duration.**

50  
51

| Factors | Total | Sleep duration | P-value |
|---------|-------|----------------|---------|
|         |       |                |         |

52  
53  
54

|                        |               | 6(-) h        | 6 h           | 7 h           | 8 h           | 9+ h          |         |
|------------------------|---------------|---------------|---------------|---------------|---------------|---------------|---------|
| Number                 |               |               |               |               |               |               |         |
| n                      | 118,4<br>62   | 27,409        | 29,773        | 30,254        | 20,743        | 10,283        |         |
| %                      | 100           | 23.1          | 25.1          | 25.5          | 17.5          | 8.7           |         |
| Mean Age (year,<br>SD) | 15.0<br>(1.7) | 16.1<br>(1.5) | 15.5<br>(1.6) | 14.7<br>(1.6) | 13.9<br>(1.5) | 14.0<br>(1.6) | <0.001* |
| Sex (%)                |               |               |               |               |               |               | <0.001† |
| Male                   | 50.2          | 41.8          | 47.7          | 52.3          | 57.1          | 59.5          |         |
| Female                 | 49.8          | 58.2          | 52.3          | 47.7          | 42.9          | 40.5          |         |
| Obesity (%)            |               |               |               |               |               |               | <0.001† |
| Underweight            | 6.1           | 5.9           | 6.2           | 6.0           | 6.2           | 6.9           |         |
| Healthy                | 78.8          | 80.3          | 79.5          | 78.1          | 77.8          | 76.5          |         |
| Overweight             | 11.3          | 10.8          | 10.8          | 11.8          | 11.8          | 11.8          |         |
| Obese                  | 3.8           | 3.0           | 3.5           | 4.1           | 4.2           | 4.8           |         |
| Region (%)             |               |               |               |               |               |               | <0.001† |
| Large City             | 44.7          | 49.4          | 46.6          | 43.3          | 40.6          | 39.0          |         |
| Small City             | 47.3          | 44.5          | 46.4          | 48.1          | 49.8          | 50.1          |         |
| Rural Area             | 8.0           | 6.1           | 7.1           | 8.6           | 9.6           | 10.9          |         |
| Stress (%)             |               |               |               |               |               |               | <0.001† |
| Severe                 | 8.9           | 13.7          | 9.3           | 7.1           | 5.7           | 7.1           |         |
| Moderate               | 27.3          | 34.4          | 29.1          | 25.0          | 21.4          | 21.7          |         |
| Mild                   | 43.8          | 39.9          | 45.1          | 45.8          | 44.8          | 42.8          |         |

|                                  |      |      |      |      |      |      |         |
|----------------------------------|------|------|------|------|------|------|---------|
| A little                         | 16.6 | 10.1 | 14.3 | 18.8 | 23.0 | 21.9 |         |
| No                               | 3.3  | 1.9  | 2.3  | 3.3  | 5.2  | 6.6  |         |
| Economic Level (%)               |      |      |      |      |      |      | <0.001† |
| Highest                          | 8.1  | 7.3  | 6.9  | 7.9  | 9.5  | 11.1 |         |
| Middle High                      | 26.5 | 26.7 | 25.5 | 25.7 | 28.1 | 27.7 |         |
| Middle                           | 48.3 | 46.9 | 48.9 | 49.5 | 48.3 | 46.3 |         |
| Middle Low                       | 14.0 | 15.2 | 15.2 | 13.9 | 11.8 | 11.9 |         |
| Lowest                           | 3.2  | 3.9  | 3.5  | 3.0  | 2.3  | 3.0  |         |
| Educational level,<br>Father (%) |      |      |      |      |      |      | <0.001† |
| Unknown                          | 19.7 | 12.8 | 16.0 | 21.9 | 26.6 | 28.5 |         |
| Middle School                    | 2.7  | 2.6  | 2.8  | 2.8  | 2.4  | 2.6  |         |
| High School                      | 29.2 | 28.8 | 30.5 | 30.3 | 27.5 | 26.9 |         |
| College, or over                 | 48.4 | 55.8 | 50.8 | 45.0 | 43.6 | 42.0 |         |
| Educational level,<br>Mother (%) |      |      |      |      |      |      | <0.001† |
| Unknown                          | 18.9 | 12.0 | 15.2 | 21.0 | 25.8 | 28.1 |         |
| Middle School                    | 2.3  | 2.3  | 2.5  | 2.3  | 2.0  | 2.2  |         |
| High School                      | 37.1 | 39.1 | 39.3 | 37.1 | 33.7 | 31.8 |         |
| College, or over                 | 41.7 | 46.7 | 43.0 | 39.6 | 38.5 | 37.9 |         |

202 \* Linear regression analysis with complex sampling, Significance at  $P < 0.05$

203 † Chi-square test with Rao-Scott correction, Significance at  $P < 0.05$

204

205 Higher frequencies of instant noodle, fruits, vegetables, and milk intake were associated  
 206 with longer sleep durations, while higher frequencies of soda, soft drinks, fast food, and  
 207 confectionaries intake were associated with shorter sleep durations (all P values < 0.001,  
 208 Table 2).

209 **Table 2. Food consumption of participants according to sleep duration.**

| Factors          | Sleep duration |        |      |      |      |      | P-value |
|------------------|----------------|--------|------|------|------|------|---------|
|                  | Total          | 6(-) h | 6 h  | 7 h  | 8 h  | 9+ h |         |
| Fruits (%)       |                |        |      |      |      |      | <0.001* |
| ≥5 times a week  | 33.4           | 33.4   | 31.9 | 32.5 | 35.6 | 35.8 |         |
| 3-4 times a week | 28.9           | 28.2   | 29.0 | 29.2 | 29.4 | 28.0 |         |
| 1-2 times a week | 29.5           | 30.1   | 30.8 | 29.9 | 27.0 | 27.9 |         |
| 0 time a week    | 8.3            | 8.3    | 8.3  | 8.4  | 8.0  | 8.7  |         |
| Soda (%)         |                |        |      |      |      |      | <0.001* |
| ≥5 times a week  | 8.0            | 8.3    | 8.1  | 8.0  | 7.7  | 8.0  |         |
| 3-4 times a week | 18.2           | 17.2   | 18.8 | 18.8 | 18.2 | 17.4 |         |
| 1-2 times a week | 48.9           | 48.0   | 49.0 | 49.8 | 49.0 | 48.0 |         |
| 0 time a week    | 24.9           | 26.5   | 24.2 | 23.4 | 25.1 | 26.6 |         |
| Soft drinks (%)  |                |        |      |      |      |      | <0.001* |
| ≥5 times a week  | 13.9           | 16.3   | 14.5 | 13.1 | 12.0 | 11.6 |         |
| 3-4 times a week | 25.9           | 26.7   | 26.5 | 26.0 | 24.7 | 24.0 |         |
| 1-2 times a week | 44.1           | 42.2   | 43.9 | 44.8 | 45.6 | 44.6 |         |
| 0 time a week    | 16.1           | 14.7   | 15.0 | 16.1 | 17.7 | 19.8 |         |



|                     |      |      |      |      |      |      |         |
|---------------------|------|------|------|------|------|------|---------|
| Fast food (%)       |      |      |      |      |      |      | <0.001* |
| ≥5 times a week     | 2.5  | 2.8  | 2.6  | 2.2  | 2.2  | 2.7  |         |
| 3-4 times a week    | 11.9 | 12.6 | 12.8 | 11.7 | 10.6 | 10.7 |         |
| 1-2 times a week    | 59.8 | 60.0 | 60.7 | 60.5 | 58.8 | 56.2 |         |
| 0 time a week       | 25.8 | 24.6 | 23.8 | 25.5 | 28.3 | 30.3 |         |
| Instant noodle (%)  |      |      |      |      |      |      | <0.001* |
| ≥5 times a week     | 4.6  | 4.4  | 4.3  | 4.8  | 4.8  | 5.4  |         |
| 3-4 times a week    | 17.6 | 15.0 | 16.9 | 18.6 | 19.7 | 18.6 |         |
| 1-2 times a week    | 51.6 | 49.8 | 51.9 | 52.4 | 52.6 | 51.3 |         |
| 0 time a week       | 26.2 | 30.8 | 26.9 | 24.2 | 22.9 | 24.6 |         |
| Confectionaries (%) |      |      |      |      |      |      | <0.001* |
| ≥5 times a week     | 10.7 | 12.2 | 11.1 | 9.9  | 9.7  | 9.7  |         |
| 3-4 times a week    | 26.4 | 27.1 | 26.9 | 26.4 | 25.5 | 24.4 |         |
| 1-2 times a week    | 45.4 | 44.3 | 45.6 | 45.9 | 45.9 | 45.6 |         |
| 0 time a week       | 17.6 | 16.5 | 16.5 | 17.8 | 18.9 | 20.3 |         |
| Vegetables (%)      |      |      |      |      |      |      | <0.001* |
| ≥5 times a week     | 56.6 | 57.3 | 55.4 | 55.4 | 57.8 | 58.7 |         |
| 3-4 times a week    | 24.1 | 23.8 | 24.5 | 25.1 | 23.2 | 22.6 |         |
| 1-2 times a week    | 15.7 | 15.0 | 16.4 | 16.1 | 15.6 | 14.9 |         |
| 0 time a week       | 3.6  | 4.0  | 3.7  | 3.4  | 3.4  | 3.8  |         |
| Milk (%)            |      |      |      |      |      |      | <0.001* |
| ≥5 times a week     | 41.9 | 36.7 | 38.4 | 42.9 | 48.4 | 50.4 |         |
| 3-4 times a week    | 20.0 | 20.3 | 20.4 | 20.2 | 19.6 | 18.2 |         |

|                  |      |      |      |      |      |      |  |
|------------------|------|------|------|------|------|------|--|
| 1-2 times a week | 22.4 | 24.3 | 24.0 | 22.2 | 19.4 | 18.6 |  |
| 0 time a week    | 15.7 | 18.7 | 17.3 | 14.8 | 12.5 | 12.8 |  |

210 \* Chi-square test with Rao-Scott correction, Significance at  $P < 0.05$

211

212 Short sleep durations ( $< 6$  h) were associated with a higher intake of soft drinks (AOR  
 213 [95% CI] for  $\geq 5$  times a week, 1.73 [1.57-1.91];  $P < 0.001$ ) and with a higher intake of  
 214 confectionaries (AOR [95% CI] for  $\geq 5$  times a week, 1.32 [1.20-1.46];  $P < 0.001$ ). Soda and  
 215 fast food intake showed an increasing trend in the group getting  $< 6$  h of sleep. However, it  
 216 was not definite. Fruits, instant noodle, vegetables, and milk intake did not show an evident  
 217 association with getting  $< 6$  h of sleep per night despite the significant association with sleep  
 218 duration overall (Table 3). Unadjusted model was also analyzed (S2 Table).

219

220

221 **Table 3. Adjusted odd ratios of sleep duration for food consumption using multiple logistic regression analysis with complex sampling**  
 222 **(Reference of food frequency = 0 time a week).**

| Factors          | AOR (95% Confidence interval) of sleep duration |                  |                  |                  |      | P-value |
|------------------|-------------------------------------------------|------------------|------------------|------------------|------|---------|
|                  | 6(-) h                                          | 6 h              | 7 h              | 8 h              | 9+ h |         |
| Fruits (%)       |                                                 |                  |                  |                  |      | <0.001* |
| ≥5 times a week  | 1.07 (0.97-1.18)                                | 0.97 (0.89-1.06) | 0.95 (0.87-1.04) | 1.03 (0.94-1.12) | 1    |         |
| 3-4 times a week | 1.04 (0.94-1.15)                                | 1.05 (0.96-1.16) | 1.05 (0.95-1.15) | 1.11 (1.00-1.22) | 1    |         |
| 1-2 times a week | 0.98 (0.89-1.08)                                | 1.02 (0.92-1.12) | 1.03 (0.94-1.13) | 1.02 (0.92-1.12) | 1    |         |
| Soda (%)         |                                                 |                  |                  |                  |      | <0.001* |
| ≥5 times a week  | 1.27 (1.14-1.41)                                | 1.29 (1.17-1.42) | 1.27 (1.16-1.40) | 1.08 (0.97-1.19) | 1    |         |
| 3-4 times a week | 1.08 (1.00-1.17)                                | 1.25 (1.17-1.34) | 1.29 (1.21-1.38) | 1.13 (1.05-1.22) | 1    |         |
| 1-2 times a week | 1.00 (0.94-1.07)                                | 1.12 (1.06-1.18) | 1.20 (1.14-1.27) | 1.09 (1.03-1.16) | 1    |         |
| Soft drinks (%)  |                                                 |                  |                  |                  |      | <0.001* |
| ≥5 times a week  | 1.73 (1.57-1.91)                                | 1.57 (1.44-1.71) | 1.38 (1.26-1.50) | 1.16 (1.06-1.28) | 1    |         |

|                     |                  |                  |                  |                  |   |         |
|---------------------|------------------|------------------|------------------|------------------|---|---------|
| 3-4 times a week    | 1.36 (1.25-1.47) | 1.36 (1.37-1.46) | 1.28 (1.19-1.38) | 1.15 (1.07-1.24) | 1 |         |
| 1-2 times a week    | 1.16 (1.09-1.25) | 1.22 (1.15-1.30) | 1.18 (1.11-1.26) | 1.14 (1.07-1.22) | 1 |         |
| Fast food (%)       |                  |                  |                  |                  |   | <0.001* |
| ≥5 times a week     | 1.12 (0.95-1.32) | 1.15 (0.99-1.34) | 0.95 (0.82-1.11) | 0.86 (0.74-1.00) | 1 |         |
| 3-4 times a week    | 1.18 (1.08-1.29) | 1.31 (1.20-1.28) | 1.22 (1.12-1.32) | 1.07 (0.99-1.17) | 1 |         |
| 1-2 times a week    | 1.12 (1.05-1.19) | 1.22 (1.15-1.28) | 1.22 (1.15-1.28) | 1.13 (1.07-1.19) | 1 |         |
| Instant noodle (%)  |                  |                  |                  |                  |   | <0.001* |
| ≥5 times a week     | 1.09 (0.96-1.24) | 1.03 (0.91-1.17) | 1.07 (0.95-1.20) | 0.98 (0.87-1.11) | 1 |         |
| 3-4 times a week    | 0.93 (0.86-1.01) | 1.06 (0.98-1.14) | 1.15 (1.07-1.23) | 1.17 (1.08-1.26) | 1 |         |
| 1-2 times a week    | 0.92 (0.86-0.98) | 1.04 (0.98-1.10) | 1.09 (1.03-1.16) | 1.11 (1.04-1.18) | 1 |         |
| Confectionaries (%) |                  |                  |                  |                  |   | <0.001* |
| ≥5 times a week     | 1.32 (1.20-1.46) | 1.28 (1.17-1.41) | 1.10 (1.00-1.20) | 1.06 (0.97-1.17) | 1 |         |
| 3-4 times a week    | 1.20 (1.11-1.29) | 1.22 (1.13-1.31) | 1.16 (1.08-1.24) | 1.10 (1.02-1.18) | 1 |         |
| 1-2 times a week    | 1.09 (1.12-1.17) | 1.15 (1.07-1.23) | 1.11 (1.04-1.18) | 1.08 (1.01-1.16) | 1 |         |

1  
2  
3  
4  
5  
6  
7  
8  
9  
10  
11  
12  
13  
14  
15  
16  
17  
18  
19  
20  
21  
22  
23  
24  
25  
26  
27  
28  
29  
30  
31  
32  
33  
34  
35  
36  
37  
38  
39  
40  
41  
42  
43  
44  
45  
46  
47

|                  |                  |                  |                  |                  |   |         |
|------------------|------------------|------------------|------------------|------------------|---|---------|
| Vegetables (%)   |                  |                  |                  |                  |   | <0.001* |
| ≥5 times a week  | 0.96 (0.85-1.10) | 0.95 (0.83-1.07) | 1.04 (0.92-1.17) | 1.07 (0.94-1.22) | 1 |         |
| 3-4 times a week | 0.92 (0.80-1.05) | 0.98 (0.86-1.12) | 1.15 (1.02-1.30) | 1.10 (0.96-1.25) | 1 |         |
| 1-2 times a week | 0.91 (0.79-1.05) | 1.02 (0.90-1.17) | 1.17 (1.03-1.33) | 1.15 (1.01-1.33) | 1 |         |
| Milk (%)         |                  |                  |                  |                  |   | <0.001* |
| ≥5 times a week  | 0.99 (0.91-1.07) | 0.91 (0.85-0.98) | 0.92 (0.85-0.99) | 0.97 (0.89-1.04) | 1 |         |
| 3-4 times a week | 1.06 (0.97-1.15) | 1.04 (0.96-1.13) | 1.09 (1.00-1.18) | 1.09 (1.00-1.19) | 1 |         |
| 1-2 times a week | 1.01 (0.93-1.09) | 1.05 (0.97-1.14) | 1.06 (0.98-1.14) | 1.03 (0.95-1.12) | 1 |         |

\* Significance at P < 0.05

226 Sleep quality was also associated with the frequency of food intake. Poor quality of sleep  
 227 was associated with a lower intake of fruits, vegetables, and milk (AOR [95% CI] for  $\geq 5$   
 228 times a week for fruits, 0.71 [0.65-0.77]; vegetables, 0.66 [0.58-0.75]; and milk, 0.80 [0.74-  
 229 0.86]; each  $P < 0.001$ ). Poor sleep quality was also related with a higher intake of soda, soft  
 230 drinks, fast food, instant noodle, and confectionaries (AOR [95% CI] for  $\geq 5$  times a week for  
 231 soda, 1.55 [1.40-1.70]; soft drinks, 1.58 [1.43-1.73]; fast food, 1.97 [1.65-2.35]; instant  
 232 noodle, 1.55 [1.37-1.76]; and confectionaries, 1.30 [1.18-1.43]; each  $P < 0.001$ , Table 4).

233  
 234 **Table 4. Adjusted odd ratios of quality of sleep for food consumption using multiple**  
 235 **logistic regression analysis with complex sampling (Reference of food frequency = 0 time**  
 236 **a week) in 7 h and 8 h groups.**

| Factors               | Quality of sleep |                  |                  | P-value |
|-----------------------|------------------|------------------|------------------|---------|
|                       | Good             | Moderate         | Poor             |         |
| Fruits (%)            |                  |                  |                  | <0.001* |
| $\geq 5$ times a week | 1                | 0.81 (0.74-0.89) | 0.71 (0.65-0.77) |         |
| 3-4 times a week      | 1                | 0.93 (0.85-1.01) | 0.79 (0.72-0.87) |         |
| 1-2 times a week      | 1                | 1.00 (0.92-1.09) | 0.90 (0.82-0.99) |         |
| Soda (%)              |                  |                  |                  | <0.001* |
| $\geq 5$ times a week | 1                | 1.27 (1.16-1.40) | 1.55 (1.40-1.70) |         |
| 3-4 times a week      | 1                | 1.25 (1.16-1.33) | 1.35 (1.25-1.45) |         |
| 1-2 times a week      | 1                | 1.14 (1.08-1.20) | 1.15 (1.08-1.22) |         |
| Soft drinks (%)       |                  |                  |                  | <0.001* |

|                     |   |                  |                  |         |
|---------------------|---|------------------|------------------|---------|
| ≥5 times a week     | 1 | 1.24 (1.15-1.35) | 1.58 (1.43-1.73) |         |
| 3-4 times a week    | 1 | 1.21 (1.13-1.29) | 1.36 (1.26-1.46) |         |
| 1-2 times a week    | 1 | 1.09 (1.03-1.16) | 1.10 (1.03-1.18) |         |
| Fast food (%)       |   |                  |                  | <0.001* |
| ≥5 times a week     | 1 | 1.26 (1.07-1.49) | 1.97 (1.65-2.35) |         |
| 3-4 times a week    | 1 | 1.28 (1.19-1.38) | 1.49 (1.37-1.62) |         |
| 1-2 times a week    | 1 | 1.11 (1.06-1.17) | 1.18 (1.11-1.25) |         |
| Instant noodle (%)  |   |                  |                  | <0.001* |
| ≥5 times a week     | 1 | 1.29 (1.14-1.45) | 1.55 (1.37-1.76) |         |
| 3-4 times a week    | 1 | 1.27 (1.19-1.36) | 1.31 (1.22-1.42) |         |
| 1-2 times a week    | 1 | 1.14 (1.09-1.20) | 1.11 (1.05-1.18) |         |
| Confectionaries (%) |   |                  |                  | <0.001* |
| ≥5 times a week     | 1 | 1.13 (1.03-1.23) | 1.30 (1.18-1.43) |         |
| 3-4 times a week    | 1 | 1.12 (1.04-1.19) | 1.08 (1.01-1.17) |         |
| 1-2 times a week    | 1 | 1.05 (0.99-1.12) | 1.00 (0.93-1.07) |         |
| Vegetables (%)      |   |                  |                  | <0.001* |
| ≥5 times a week     | 1 | 0.97 (0.86-1.10) | 0.66 (0.58-0.75) |         |
| 3-4 times a week    | 1 | 1.14 (1.00-1.30) | 0.78 (0.68-0.89) |         |
| 1-2 times a week    | 1 | 1.30 (1.14-1.49) | 0.98 (0.85-1.12) |         |
| Milk (%)            |   |                  |                  | <0.001* |
| ≥5 times a week     | 1 | 0.89 (0.83-0.95) | 0.80 (0.74-0.86) |         |
| 3-4 times a week    | 1 | 1.01 (0.94-1.09) | 0.86 (0.79-0.93) |         |
| 1-2 times a week    | 1 | 0.99 (0.92-1.06) | 0.91 (0.84-0.99) |         |

1  
2  
3  
4 237 \* Significance at  $P < 0.05$   
5  
6

7 238  
8

9 239 **DISCUSSION**  
10

11  
12 240 We found that shorter sleep durations were associated with higher frequencies of consuming  
13  
14 241 soft drinks and confectionaries than were longer sleep durations. Additionally, poor sleep  
15  
16 242 quality, with 7 to 8 h of sleep per night, was associated with a lower frequency of fruits,  
17  
18 243 vegetables and milk intake, and a higher frequency of soda, soft drinks, fast food, instant  
19  
20 244 noodle and confectionaries intake. Unlike in previous studies, we found an association  
21  
22 245 between not only sleep duration but also between sleep quality and the intake of various  
23  
24 246 foods.  
25  
26

27  
28 247 According to these outcomes, sleep duration in association with sleep quality might  
29  
30 248 affect one's appetite and even be related to health problems. According to previous studies, a  
31  
32 249 short sleep duration or poor sleep quality is associated with appetite-related hormonal  
33  
34 250 changes such as lower leptin and higher ghrelin levels. These results were also associated  
35  
36 251 with greater energy intake and a higher BMI.<sup>16 17</sup> According to a study by Baron et al.,  
37  
38 252 people who fall asleep later sleep less and consume more calories than people who fall asleep  
39  
40 253 earlier. Moreover, consuming calories after 8 pm was associated with a higher BMI.<sup>21</sup>  
41  
42 254 Rudnicka et al. reported that shorter sleep durations in children were associated with a higher  
43  
44 255 prevalence of risk factors for type 2 diabetes, such as increases in the fat mass index, insulin  
45  
46 256 resistance and fasting glucose level.<sup>22</sup> Meanwhile, Doo et al. reported that participants with  
47  
48 257 shorter sleep durations and a higher consumption of dietary antioxidant vitamins had a lower  
49  
50 258 risk of obesity than those with a lower consumption of dietary antioxidant vitamins.<sup>23</sup> In  
51  
52 259 summary, a short sleep duration in association with poor sleep quality could affect dietary  
53  
54



1  
2  
3  
4 260 habits and appetite, which could result in health problems. Nevertheless, people who sleep for  
5  
6 261 shorter durations can reduce the risks of health problems by consuming foods rich in  
7  
8 262 micronutrients such as vitamins. Although nutrient profiles were not available in our study,  
9  
10 263 sugar-sweetened beverages such as soda and soft drinks, confectionaries, fast food, and  
11  
12 264 instant noodle have higher energy levels but less micronutrients than fruits, vegetables, and  
13  
14 265 milk. Sugar-sweetened beverages contain mainly liquid calories provided by sugars and have  
15  
16 266 very few of other nutrients. A potential biological mechanism for sugar-sweetened beverages  
17  
18 267 leading to obesity is that liquid calories may result in decreased satiety, leading to the  
19  
20 268 consumption of more sugar-sweetened beverages with subsequent weight gain.<sup>24</sup> Fast food,  
21  
22 269 confectionaries, and instant noodle contain high energy densities, with calories derived from  
23  
24 270 carbohydrates and fats and with minimal amounts of other nutrients. Nevertheless, humans  
25  
26 271 have a weak innate ability to recognize energy density, so humans fail to down-regulation the  
27  
28 272 consumption of most of these foods accordingly.<sup>25</sup> Obesity is one of the risk factors of type 2  
29  
30 273 diabetes because it is related to an increase in insulin resistance.<sup>26</sup> In fact, previous studies  
31  
32 274 reported that sugar-sweetened beverage and fast food consumption were associated with not  
33  
34 275 only changes in bodyweight but also increased insulin resistance.<sup>24,27</sup> Hence, consumption of  
35  
36 276 these foods could be a potential mechanistic link between sleep duration in association with  
37  
38 277 quality and health problems, including obesity and type 2 diabetes in adolescents.

42  
43 278 On the other hand, food intake might affect sleep duration in association with quality.  
44  
45 279 Fruits, vegetables, and milk are sources of vitamins and minerals. Grandner et al. reported  
46  
47 280 that sleep symptoms such as difficulty falling asleep, difficulty maintaining sleep, non-  
48  
49 281 restorative sleep, and daytime sleepiness was associated with a lower intake of calcium,  
50  
51 282 potassium, selenium, vitamin C, vitamin D, alpha-carotene, and lycopene.<sup>28</sup> Although

1  
2  
3  
4 283 mechanistic links between vitamin intake and sleep quality are unclear, previous studies have  
5  
6 284 verified the relationship between sleep duration and vitamin intake.<sup>29 30</sup> In addition, Grandner  
7  
8 285 et al. reported that sleep symptoms associated with poor sleep quality were associated with a  
9  
10 286 higher intake of salt<sup>28</sup>, and fast food and instant noodle intake are associated with salt intake.  
11  
12 287 According to the Korean food composition table, the sodium content of cooked hamburger is  
13  
14 288 498 mg/100 g, and that of cheese pizza is 447 mg/100 g. Instant noodle seasoning contains  
15  
16 289 2,225 mg of sodium in one portion (10.5 g).<sup>31</sup> Excessive salt (and therefore sodium) intake  
17  
18 290 leads to elevated blood pressure, whereas calcium and potassium lower blood pressure.<sup>32</sup>  
19  
20 291 According to the intervention study by Fereidoun et al., providing 0.05 g/kg of salt to  
21  
22 292 participants resulted in poor sleep quality.<sup>33</sup> According to a study by Javaheri et al., poor  
23  
24 293 sleep quality in adolescents was associated with prehypertension.<sup>34</sup> The findings of previous  
25  
26 294 studies and those of our study show that consuming foods with high levels of salt and low  
27  
28 295 levels of other micronutrients might result in reduced sleep durations and poor sleep quality.

29 30  
31  
32 296 The limitations of our study are as follows. First, our study was based on data collected  
33  
34 297 by the KYRBWS, and as secondary data, it has some limitations in providing specific  
35  
36 298 information. For example, the dataset did not have information on nutrient contents or the  
37  
38 299 quantity of food consumed to go along with intake frequency data. In addition, data on other  
39  
40 300 confounding factors such as school examination periods or the time of eating before bed were  
41  
42 301 not present. Second, because the data were collected based on a self-reported questionnaire  
43  
44 302 including weight and height, the precision of the information may be low such as BMI have  
45  
46 303 possibility of underestimation.<sup>35</sup> Third, the questionnaire for sleep duration and food intake  
47  
48 304 frequency was limited to asking about the previous 7 days. Hence, the responses on the  
49  
50 305 questionnaire may not represent the usual sleep duration, sleep quality or food intake  
51  
52  
53  
54  
55  
56  
57  
58  
59  
60

1  
2  
3  
4 306 frequency of each participant. To collect usual sleep duration and food intake data, the  
5  
6 307 validity and reliability of the questionnaire should be evaluated in a further study. Finally,  
7  
8 308 because of the cross-sectional design, the causal relationship between sleep duration and  
9  
10 309 quality and food intake frequency is unclear. Longitudinal, randomized, controlled studies  
11  
12 310 should be conducted to determine the causal relationship. Despite of these limitations, our  
13  
14 311 findings provide valuable information for the following reasons. First, our study was  
15  
16 312 conducted on a representative population of Korean adolescents. Second, we considered  
17  
18 313 numerous socio-economic status variables as confounding factors to investigate the  
19  
20 314 independent relationship between sleep status and food consumption. Third, we considered  
21  
22 315 not only sleep duration but also sleep quality in explaining sleep status. Finally, we  
23  
24 316 investigated the intake frequency of various foods to show the relationship between sleep  
25  
26 317 status and food consumption.  
27  
28  
29  
30  
31  
32

### 319 **CONCLUSION**

320 In our study, a short sleep duration was related to a higher frequency of soft drinks and  
321 confectionaries intake. Additionally, poor sleep quality with a normal sleep duration was  
322 related to a lower frequency of fruits, vegetables and milk intake, and a higher frequency of  
323 soda, soft drinks, fast food, instant noodle and confectionaries intake in adolescents. Hence,  
324 we demonstrate that short sleep durations and poor sleep quality might be associated with  
325 unhealthy food consumption, such as consuming more sugar-sweetened beverages, fast food,  
326 instant noodle and confectionaries, and fewer fruits, vegetables and milk. Further studies with  
327 a longitudinal, randomized, controlled design are needed to elucidate the specific causal  
328 relationship between sleep status and food consumption in adolescents.

1  
2  
3  
4 329

5  
6 330 **ACKNOWLEDGMENTS**

7  
8  
9 331 This research was supported by Hallym University Research Fund.  
10  
11  
12  
13  
14  
15  
16  
17  
18  
19  
20  
21  
22  
23  
24  
25  
26  
27  
28  
29  
30  
31  
32  
33  
34  
35  
36  
37  
38  
39  
40  
41  
42  
43  
44  
45  
46  
47  
48  
49  
50  
51  
52  
53  
54

For peer review only

332 **REFERENCES**

- 333 1. National Sleep Foundation. Teens and Sleep. Available from:  
334 <https://sleepfoundation.org/sleep-topics/teens-and-sleep> accessed 8/29 2017.
- 335 2. Keyes KM, Maslowsky J, Hamilton A, et al. The great sleep recession: changes in sleep  
336 duration among US adolescents, 1991-2012. *Pediatrics* 2015;135(3):460-8. doi:  
337 10.1542/peds.2014-2707 [published Online First: 2015/02/18]
- 338 3. Cain N, Gradisar M. Electronic media use and sleep in school-aged children and  
339 adolescents: A review. *Sleep medicine* 2010;11(8):735-42. doi:  
340 10.1016/j.sleep.2010.02.006 [published Online First: 2010/08/03]
- 341 4. Ming X, Koransky R, Kang V, et al. Sleep insufficiency, sleep health problems and  
342 performance in high school students. *Clinical medicine insights Circulatory, respiratory*  
343 *and pulmonary medicine* 2011;5:71-9. doi: 10.4137/ccrpm.s7955 [published Online First:  
344 2011/11/16]
- 345 5. Meldrum RC, Restivo E. The behavioral and health consequences of sleep deprivation  
346 among U.S. high school students: relative deprivation matters. *Preventive medicine*  
347 2014;63:24-8. doi: 10.1016/j.ypmed.2014.03.006 [published Online First: 2014/03/19]
- 348 6. Smaldone A, Honig JC, Byrne MW. Sleepless in America: inadequate sleep and  
349 relationships to health and well-being of our nation's children. *Pediatrics* 2007;119 Suppl  
350 1:S29-37. doi: 10.1542/peds.2006-2089F [published Online First: 2007/02/03]
- 351 7. Wolfson AR, Carskadon MA. Understanding adolescents' sleep patterns and school  
352 performance: a critical appraisal. *Sleep medicine reviews* 2003;7(6):491-506. [published  
353 Online First: 2004/03/17]

- 1  
2  
3  
4 354 8. Fatima Y, Doi SA, Mamun AA. Longitudinal impact of sleep on overweight and obesity in  
5  
6 355 children and adolescents: a systematic review and bias-adjusted meta-analysis. *Obesity*  
7  
8 356 reviews : an official journal of the International Association for the Study of Obesity  
9  
10 357 2015;16(2):137-49. doi: 10.1111/obr.12245 [published Online First: 2015/01/16]  
11  
12  
13 358 9. World Health Organization. Obesity and overweight. Available from:  
14  
15 359 <http://www.who.int/mediacentre/factsheets/fs311/en/> accessed 3/7 2018.  
16  
17  
18 360 10. World Health Organization. What are the causes?: Reasons for children and adolescents to  
19  
20 361 become obese. Available from:  
21  
22 362 [http://www.who.int/dietphysicalactivity/childhood\\_why/en/](http://www.who.int/dietphysicalactivity/childhood_why/en/) accessed 8/31 2017.  
23  
24  
25 363 11. Bucher Della Torre S, Keller A, Laure Depeyre J, et al. Sugar-Sweetened Beverages and  
26  
27 364 Obesity Risk in Children and Adolescents: A Systematic Analysis on How  
28  
29 365 Methodological Quality May Influence Conclusions. *Journal of the Academy of*  
30  
31 366 *Nutrition and Dietetics* 2016;116(4):638-59. doi: 10.1016/j.jand.2015.05.020 [published  
32  
33 367 Online First: 2015/07/22]  
34  
35  
36 368 12. Schwingshackl L, Hobl LP, Hoffmann G. Effects of low glycaemic index/low glycaemic  
37  
38 369 load vs. high glycaemic index/ high glycaemic load diets on overweight/obesity and  
39  
40 370 associated risk factors in children and adolescents: a systematic review and meta-analysis.  
41  
42 371 *Nutrition journal* 2015;14:87. doi: 10.1186/s12937-015-0077-1 [published Online First:  
43  
44 372 2015/10/23]  
45  
46  
47  
48 373 13. Ferranti R, Marventano S, Castellano S, et al. Sleep quality and duration is related with  
49  
50 374 diet and obesity in young adolescent living in Sicily, Southern Italy. *Sleep science (Sao*  
51  
52 375 *Paulo, Brazil)* 2016;9(2):117-22. doi: 10.1016/j.slsci.2016.04.003 [published Online First:  
53  
54

- 1  
2  
3  
4 376 2016/09/23]
- 5  
6  
7 377 14. Gong QH, Li H, Zhang XH, et al. Associations between sleep duration and physical  
8  
9 378 activity and dietary behaviors in Chinese adolescents: results from the Youth Behavioral  
10  
11 379 Risk Factor Surveys of 2015. *Sleep medicine* 2017;37:168-73. doi:  
12  
13 380 10.1016/j.sleep.2017.06.024 [published Online First: 2017/09/14]
- 14  
15  
16 381 15. Kruger AK, Reither EN, Peppard PE, et al. Do sleep-deprived adolescents make less-  
17  
18 382 healthy food choices? *The British journal of nutrition* 2014;111(10):1898-904. doi:  
19  
20 383 10.1017/s0007114514000130 [published Online First: 2014/02/15]
- 21  
22  
23 384 16. Gonnissen HK, Hursel R, Rutters F, et al. Effects of sleep fragmentation on appetite and  
24  
25 385 related hormone concentrations over 24 h in healthy men. *The British journal of nutrition*  
26  
27 386 2013;109(4):748-56. doi: 10.1017/s0007114512001894 [published Online First:  
28  
29 387 2012/06/12]
- 30  
31  
32 388 17. Taheri S, Lin L, Austin D, et al. Short sleep duration is associated with reduced leptin,  
33  
34 389 elevated ghrelin, and increased body mass index. *PLoS medicine* 2004;1(3):e62. doi:  
35  
36 390 10.1371/journal.pmed.0010062 [published Online First: 2004/12/17]
- 37  
38  
39 391 18. Korea National Health and Nutrition Examination Survey. *Korea Health Statistics* 2016:  
40  
41  
42 392 Korea National Health and Nutrition Examination Survey (KNHANES VII-1), 2018.
- 43  
44  
45 393 19. Lee J. Sleep duration's association with diet, physical activity, mental status, and weight  
46  
47 394 among Korean high school students. *Asia Pacific journal of clinical nutrition*  
48  
49 395 2017;26(5):906-13. doi: 10.6133/apjcn.082016.04 [published Online First: 2017/08/15]
- 50  
51  
52 396 20. Centers for Disease Control and Prevention. About BMI for Children and Teens.

- 1  
2  
3  
4 397 Available from:  
5  
6 398 [http://www.cdc.gov/healthyweight/assessing/bmi/childrens\\_bmi/about\\_childrens\\_bmi.ht](http://www.cdc.gov/healthyweight/assessing/bmi/childrens_bmi/about_childrens_bmi.html)  
7  
8 399 [ml](http://www.cdc.gov/healthyweight/assessing/bmi/childrens_bmi/about_childrens_bmi.html) accessed 11/14 2014.  
9  
10  
11 400 21. Baron KG, Reid KJ, Kern AS, et al. Role of sleep timing in caloric intake and BMI.  
12  
13 401 Obesity (Silver Spring, Md) 2011;19(7):1374-81. doi: 10.1038/oby.2011.100 [published  
14  
15 402 Online First: 2011/04/30]  
16  
17  
18 403 22. Rudnicka AR, Nightingale CM, Donin AS, et al. Sleep Duration and Risk of Type 2  
19  
20 404 Diabetes. Pediatrics 2017;140(3) doi: 10.1542/peds.2017-0338 [published Online First:  
21  
22 405 2017/08/16]  
23  
24  
25 406 23. Doo M, Kim Y. The Consumption of Dietary Antioxidant Vitamins Modifies the Risk of  
26  
27 407 Obesity among Korean Men with Short Sleep Duration. Nutrients 2017;9(7) doi:  
28  
29 408 10.3390/nu9070780 [published Online First: 2017/07/21]  
30  
31  
32 409 24. Hu FB, Malik VS. Sugar-sweetened beverages and risk of obesity and type 2 diabetes:  
33  
34 410 epidemiologic evidence. Physiology & behavior 2010;100(1):47-54. doi:  
35  
36 411 10.1016/j.physbeh.2010.01.036 [published Online First: 2010/02/09]  
37  
38  
39 412 25. Prentice AM, Jebb SA. Fast foods, energy density and obesity: a possible mechanistic link.  
40  
41 413 Obesity reviews : an official journal of the International Association for the Study of  
42  
43 414 Obesity 2003;4(4):187-94. [published Online First: 2003/12/03]  
44  
45  
46 415 26. Edelstein SL, Knowler WC, Bain RP, et al. Predictors of progression from impaired  
47  
48 416 glucose tolerance to NIDDM: an analysis of six prospective studies. Diabetes  
49  
50 417 1997;46(4):701-10. [published Online First: 1997/04/01]  
51  
52  
53 418 27. Pereira MA, Kartashov AI, Ebbeling CB, et al. Fast-food habits, weight gain, and insulin



- 1  
2  
3  
4 419 resistance (the CARDIA study): 15-year prospective analysis. *Lancet* (London, England)  
5  
6 420 2005;365(9453):36-42. doi: 10.1016/s0140-6736(04)17663-0 [published Online First:  
7  
8 421 2005/01/11]  
9  
10  
11 422 28. Grandner MA, Jackson N, Gerstner JR, et al. Sleep symptoms associated with intake of  
12  
13 423 specific dietary nutrients. *Journal of sleep research* 2014;23(1):22-34. doi:  
14  
15 424 10.1111/jsr.12084 [published Online First: 2013/09/03]  
16  
17  
18 425 29. Majid MS, Ahmad HS, Bizhan H, et al. The effect of vitamin D supplement on the score  
19  
20 426 and quality of sleep in 20-50 year-old people with sleep disorders compared with control  
21  
22 427 group. *Nutritional neuroscience* 2017:1-9. doi: 10.1080/1028415x.2017.1317395  
23  
24 428 [published Online First: 2017/05/06]  
25  
26  
27 429 30. Peuhkuri K, Sihvola N, Korpela R. Diet promotes sleep duration and quality. *Nutrition*  
28  
29 430 research (New York, NY) 2012;32(5):309-19. doi: 10.1016/j.nutres.2012.03.009  
30  
31 431 [published Online First: 2012/06/02]  
32  
33  
34 432 31. Department of Agrofood Resources, NAAS, RDA, et al. 8th revision Standard Food  
35  
36 433 Composition Table, 2013.  
37  
38  
39 434 32. Karppanen H, Mervaala E. Sodium intake and hypertension. *Progress in cardiovascular*  
40  
41 435 *diseases* 2006;49(2):59-75. doi: 10.1016/j.pcad.2006.07.001 [published Online First:  
42  
43 436 2006/10/19]  
44  
45  
46 437 33. Fereidoun H, Pouria H. Effect of excessive salt consumption on night's sleep. *Pak J*  
47  
48 438 *physiol* 2014;10(3-4):6-9.  
49  
50  
51 439 34. Javaheri S, Storfer-Isser A, Rosen CL, et al. Sleep quality and elevated blood pressure in  
52  
53 440 adolescents. *Circulation* 2008;118(10):1034-40. doi: 10.1161/circulationaha.108.766410

1  
2  
3  
4 441 [published Online First: 2008/08/20]  
5

6 442 35. Bae J, Joung H, Kim JY, et al. Validity of self-reported height, weight, and body mass  
7  
8 443 index of the Korea Youth Risk Behavior Web-based Survey questionnaire. Journal of  
9  
10 444 preventive medicine and public health = Yebang Uihakhoe chi 2010;43(5):396-402. doi:  
11  
12 10.3961/jpmph.2010.43.5.396 [published Online First: 2010/10/21]  
13  
14  
15

16 446  
17  
18

19 447  
20  
21  
22  
23  
24  
25  
26  
27  
28  
29  
30  
31  
32  
33  
34  
35  
36  
37  
38  
39  
40  
41  
42  
43  
44  
45  
46  
47  
48  
49  
50  
51  
52  
53  
54

448 **FIGURE**

449 **Figure 1. A schematic illustration of the participant selection.** From a total of 140,103  
450 participants, those getting < 3 h or > 12 h of sleep per night or with no sleep records (n =  
451 18,594), without a record of their age (403) or without height or weight data (2,644) were  
452 excluded. The data for the 118,462 participants from whom complete records were obtained  
453 were analyzed.

455 **SUPPLEMENTARY FILES**

456 **S1 Table. Quality of sleep rates of participants according to sleep duration.** \* Chi-square  
457 test with Rao-Scott correction, Significance at  $P < 0.05$

458 **S2 Table. Unadjusted odd ratios of sleep duration for food consumption using multiple**  
459 **logistic regression analysis with complex sampling (Reference of food frequency = 0 time**  
460 **a week).** \* Significance at  $P < 0.05$

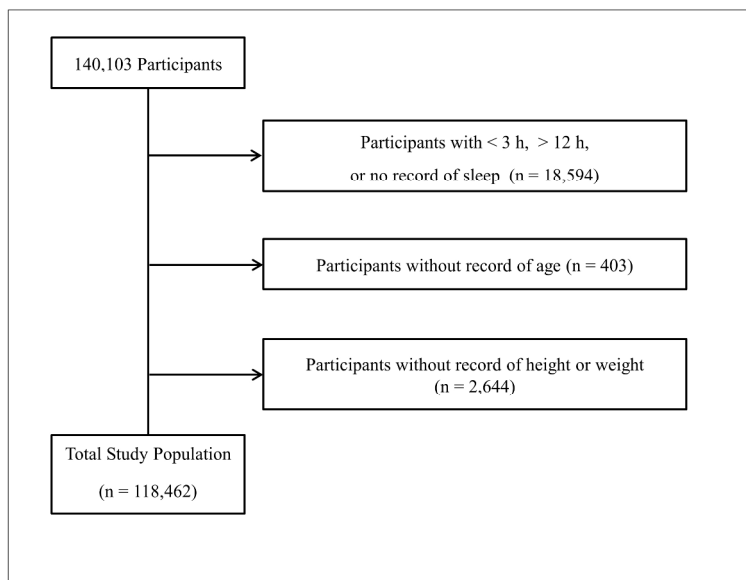

Among a total of 140,103 participants, the participants Participants with < 3 h, > 12 h, or no record of sleep (n = 18,594) or without record of age (403) and height or weight records (2,644) were excluded. The data for the 118,462 participants from whom complete data were obtained were analyzed.

254x190mm (300 x 300 DPI)

**S1 Table. Quality of sleep rates of participants according to sleep duration.**

| Factors              | Total | Sleep time |      |      |      |      | P-value |
|----------------------|-------|------------|------|------|------|------|---------|
|                      |       | 6(-) h     | 6 h  | 7 h  | 8 h  | 9+ h |         |
| Quality of sleep (%) |       |            |      |      |      |      | <0.001* |
| Good                 | 26.6  | 10.1       | 17.9 | 29.8 | 45.4 | 48.3 |         |
| Moderate             | 32.9  | 25.7       | 35.0 | 37.8 | 33.9 | 29.9 |         |
| Poor                 | 40.5  | 64.2       | 47.0 | 32.4 | 20.7 | 21.8 |         |

\* Chi-square test with Rao-Scott correction, Significance at  $P < 0.05$

**S2 Table. Unadjusted odd ratios of sleep duration for food consumption using multiple logistic regression analysis with complex sampling (Reference of food frequency = 0 time a week).**

| Factors          | AOR (95% Confidence interval) of Sleep time |                  |                  |                  |      | P-value |
|------------------|---------------------------------------------|------------------|------------------|------------------|------|---------|
|                  | 6(-) h                                      | 6 h              | 7 h              | 8 h              | 9+ h |         |
| Fruits (%)       |                                             |                  |                  |                  |      | <0.001* |
| ≥5 times a week  | 0.95 (0.87-1.04)                            | 0.89 (0.82-0.97) | 0.92 (0.84-1.00) | 1.06 (0.97-1.16) | 1    |         |
| 3-6 times a week | 1.06 (0.97-1.16)                            | 1.09 (0.99-1.19) | 1.07 (0.98-1.18) | 1.15 (1.04-1.26) | 1    |         |
| 1-2 times a week | 1.13 (1.03-1.24)                            | 1.14 (1.05-1.25) | 1.11 (1.01-1.21) | 1.04 (0.95-1.14) | 1    |         |
| Soda (%)         |                                             |                  |                  |                  |      | <0.001* |
| ≥5 times a week  | 1.07 (0.96-1.20)                            | 1.12 (1.02-1.24) | 1.14 (1.04-1.26) | 1.01 (0.92-1.12) | 1    |         |
| 3-6 times a week | 1.02 (0.94-1.10)                            | 1.20 (1.12-1.29) | 1.25 (1.17-1.33) | 1.10 (1.02-1.18) | 1    |         |
| 1-2 times a week | 1.02 (0.96-1.08)                            | 1.14 (1.08-1.21) | 1.21 (1.14-1.28) | 1.08 (1.02-1.15) | 1    |         |
| Soft drinks (%)  |                                             |                  |                  |                  |      | <0.001* |
| ≥5 times a week  | 1.90 (1.73-2.09)                            | 1.66 (1.52-1.81) | 1.39 (1.28-1.52) | 1.14 (1.04-1.25) | 1    |         |
| 3-6 times a week | 1.52 (1.41-1.64)                            | 1.49 (1.39-1.60) | 1.35 (1.25-1.45) | 1.15 (1.07-1.24) | 1    |         |

|                     |                  |                  |                  |                  |   |         |
|---------------------|------------------|------------------|------------------|------------------|---|---------|
| 1-2 times a week    | 1.28 (1.20-1.36) | 1.32 (1.25-1.41) | 1.24 (1.17-1.32) | 1.15 (1.08-1.23) | 1 |         |
| Fast food (%)       |                  |                  |                  |                  |   | <0.001* |
| ≥5 times a week     | 1.26 (.09-1.46)  | 1.21 (1.05-1.39) | 0.94 (0.81-1.09) | 0.81 (0.70-0.94) | 1 |         |
| 3-6 times a week    | 1.45 (1.33-1.58) | 1.51 (1.39-1.64) | 1.29 (1.19-1.40) | 1.06 (0.98-1.16) | 1 |         |
| 1-2 times a week    | 1.33 (1.26-1.41) | 1.38 (1.31-1.46) | 1.30 (1.23-1.37) | 1.13 (1.07-1.19) | 1 |         |
| Instant noodle (%)  |                  |                  |                  |                  |   | <0.001* |
| ≥5 times a week     | 0.66 (0.59-0.75) | 0.71 (0.63-0.80) | 0.87 (0.78-0.97) | 0.93 (0.83-1.05) | 1 |         |
| 3-6 times a week    | 0.67 (0.62-0.73) | 0.85 (0.79-0.91) | 1.03 (0.95-1.10) | 1.15 (1.07-1.24) | 1 |         |
| 1-2 times a week    | 0.79 (0.75-0.84) | 0.95 (0.89-1.00) | 1.05 (0.99-1.11) | 1.11 (1.05-1.18) | 1 |         |
| Confectionaries (%) |                  |                  |                  |                  |   | <0.001* |
| ≥5 times a week     | 1.53 (1.39-1.67) | 1.40 (1.28-1.53) | 1.14 (1.04-1.24) | 1.07 (0.97-1.17) | 1 |         |
| 3-6 times a week    | 1.39 (1.29-1.49) | 1.36 (1.27-1.46) | 1.24 (1.16-1.32) | 1.13 (1.05-1.21) | 1 |         |
| 1-2 times a week    | 1.23 (1.15-1.31) | 1.26 (1.18-1.35) | 1.17 (1.10-1.25) | 1.10 (1.03-1.18) | 1 |         |
| Vegetables (%)      |                  |                  |                  |                  |   | <0.001* |
| ≥5 times a week     | 0.94 (0.84-1.06) | 0.96 (0.85-1.08) | 1.07 (0.95-1.20) | 1.11 (0.98-1.26) | 1 |         |
| 3-6 times a week    | 1.00 (0.89-1.13) | 1.10 (0.97-1.24) | 1.25 (1.11-1.41) | 1.14 (1.00-1.31) | 1 |         |

|                  |                  |                  |                  |                  |   |         |
|------------------|------------------|------------------|------------------|------------------|---|---------|
| 1-2 times a week | 0.98 (0.87-1.11) | 1.12 (0.99-1.28) | 1.25 (1.10-1.43) | 1.19 (1.04-1.37) | 1 |         |
| Milk (%)         |                  |                  |                  |                  |   | <0.001* |
| ≥5 times a week  | 0.51 (0.47-0.55) | 0.57 (0.53-0.62) | 0.73 (0.68-0.79) | 0.97 (0.90-1.04) | 1 |         |
| 3-6 times a week | 0.79 (0.73-0.86) | 0.86 (0.79-0.93) | 1.00 (0.92-1.08) | 1.11 (1.02-1.21) | 1 |         |
| 1-2 times a week | 0.91 (0.84-0.98) | 0.98 (0.91-1.06) | 1.03 (0.96-1.12) | 1.05 (0.96-1.14) | 1 |         |

\* Significance at  $P < 0.05$



# Reporting checklist for cross sectional study.

Based on the STROBE cross sectional guidelines.

## Instructions to authors

Complete this checklist by entering the page numbers from your manuscript where readers will find each of the items listed below.

Your article may not currently address all the items on the checklist. Please modify your text to include the missing information. If you are certain that an item does not apply, please write "n/a" and provide a short explanation.

Upload your completed checklist as an extra file when you submit to a journal.

In your methods section, say that you used the STROBE cross sectional reporting guidelines, and cite them as:

von Elm E, Altman DG, Egger M, Pocock SJ, Gotsche PC, Vandembroucke JP. The Strengthening the Reporting of Observational Studies in Epidemiology (STROBE) Statement: guidelines for reporting observational studies.

|                        |     | Reporting Item                                                                                                                  | Page Number |
|------------------------|-----|---------------------------------------------------------------------------------------------------------------------------------|-------------|
| Title                  | #1a | Indicate the study's design with a commonly used term in the title or the abstract                                              | 1           |
| Abstract               | #1b | Provide in the abstract an informative and balanced summary of what was done and what was found                                 | 3-4         |
| Background / rationale | #2  | Explain the scientific background and rationale for the investigation being reported                                            | 6-7         |
| Objectives             | #3  | State specific objectives, including any prespecified hypotheses                                                                | 7           |
| Study design           | #4  | Present key elements of study design early in the paper                                                                         | 8           |
| Setting                | #5  | Describe the setting, locations, and relevant dates, including periods of recruitment, exposure, follow-up, and data collection | 8           |
| Eligibility criteria   | #6a | Give the eligibility criteria, and the sources and methods of selection of participants.                                        | 8           |

|    |                  |      |                                                                   |       |
|----|------------------|------|-------------------------------------------------------------------|-------|
| 1  |                  | #7   | Clearly define all outcomes, exposures, predictors, potential     | 8-10  |
| 2  |                  |      | confounders, and effect modifiers. Give diagnostic criteria, if   |       |
| 3  |                  |      | applicable                                                        |       |
| 4  |                  |      |                                                                   |       |
| 5  |                  |      |                                                                   |       |
| 6  | Data sources /   | #8   | For each variable of interest give sources of data and details of | 8-10  |
| 7  | measurement      |      | methods of assessment (measurement). Describe                     |       |
| 8  |                  |      | comparability of assessment methods if there is more than one     |       |
| 9  |                  |      | group. Give information separately for for exposed and            |       |
| 10 |                  |      | unexposed groups if applicable.                                   |       |
| 11 |                  |      |                                                                   |       |
| 12 |                  |      |                                                                   |       |
| 13 |                  |      |                                                                   |       |
| 14 | Bias             | #9   | Describe any efforts to address potential sources of bias         | 9-10  |
| 15 |                  |      |                                                                   |       |
| 16 |                  |      |                                                                   |       |
| 17 | Study size       | #10  | Explain how the study size was arrived at                         | 8     |
| 18 |                  |      |                                                                   |       |
| 19 | Quantitative     | #11  | Explain how quantitative variables were handled in the            | 8     |
| 20 | variables        |      | analyses. If applicable, describe which groupings were chosen,    |       |
| 21 |                  |      | and why                                                           |       |
| 22 |                  |      |                                                                   |       |
| 23 |                  |      |                                                                   |       |
| 24 | Statistical      | #12a | Describe all statistical methods, including those used to control | 10-11 |
| 25 | methods          |      | for confounding                                                   |       |
| 26 |                  |      |                                                                   |       |
| 27 |                  |      |                                                                   |       |
| 28 |                  | #12b | Describe any methods used to examine subgroups and                | 8-10  |
| 29 |                  |      | interactions                                                      |       |
| 30 |                  |      |                                                                   |       |
| 31 |                  |      |                                                                   |       |
| 32 |                  | #12c | Explain how missing data were addressed                           | 8     |
| 33 |                  |      |                                                                   |       |
| 34 |                  |      |                                                                   |       |
| 35 |                  | #12d | If applicable, describe analytical methods taking account of      | 8     |
| 36 |                  |      | sampling strategy                                                 |       |
| 37 |                  |      |                                                                   |       |
| 38 |                  |      |                                                                   |       |
| 39 |                  | #12e | Describe any sensitivity analyses                                 | 10-11 |
| 40 |                  |      |                                                                   |       |
| 41 | Participants     | #13a | Report numbers of individuals at each stage of study—eg           | 11-12 |
| 42 |                  |      | numbers potentially eligible, examined for eligibility, confirmed |       |
| 43 |                  |      | eligible, included in the study, completing follow-up, and        |       |
| 44 |                  |      | analysed. Give information separately for for exposed and         |       |
| 45 |                  |      | unexposed groups if applicable.                                   |       |
| 46 |                  |      |                                                                   |       |
| 47 |                  |      |                                                                   |       |
| 48 |                  |      |                                                                   |       |
| 49 |                  | #13b | Give reasons for non-participation at each stage                  | 8     |
| 50 |                  |      |                                                                   |       |
| 51 |                  |      |                                                                   |       |
| 52 |                  | #13c | Consider use of a flow diagram                                    | 8     |
| 53 |                  |      |                                                                   |       |
| 54 | Descriptive data | #14a | Give characteristics of study participants (eg demographic,       | 11-15 |
| 55 |                  |      | clinical, social) and information on exposures and potential      |       |
| 56 |                  |      | confounders. Give information separately for exposed and          |       |
| 57 |                  |      | unexposed groups if applicable.                                   |       |
| 58 |                  |      |                                                                   |       |
| 59 |                  |      |                                                                   |       |
| 60 |                  |      |                                                                   |       |

|    |                  |      |                                                                      |       |
|----|------------------|------|----------------------------------------------------------------------|-------|
| 1  |                  | #14b | Indicate number of participants with missing data for each           | 11-15 |
| 2  |                  |      | variable of interest                                                 |       |
| 3  |                  |      |                                                                      |       |
| 4  |                  |      |                                                                      |       |
| 5  | Outcome data     | #15  | Report numbers of outcome events or summary measures.                | 11-13 |
| 6  |                  |      | Give information separately for exposed and unexposed                |       |
| 7  |                  |      | groups if applicable.                                                |       |
| 8  |                  |      |                                                                      |       |
| 9  |                  |      |                                                                      |       |
| 10 | Main results     | #16a | Give unadjusted estimates and, if applicable, confounder-            | 20-22 |
| 11 |                  |      | adjusted estimates and their precision (eg, 95% confidence           |       |
| 12 |                  |      | interval). Make clear which confounders were adjusted for and        |       |
| 13 |                  |      | why they were included                                               |       |
| 14 |                  |      |                                                                      |       |
| 15 |                  |      |                                                                      |       |
| 16 |                  |      |                                                                      |       |
| 17 |                  | #16b | Report category boundaries when continuous variables were            | 20-22 |
| 18 |                  |      | categorized                                                          |       |
| 19 |                  |      |                                                                      |       |
| 20 |                  |      |                                                                      |       |
| 21 |                  | #16c | If relevant, consider translating estimates of relative risk into    | 20-22 |
| 22 |                  |      | absolute risk for a meaningful time period                           |       |
| 23 |                  |      |                                                                      |       |
| 24 | Other analyses   | #17  | Report other analyses done—e.g., analyses of subgroups and           | 16-19 |
| 25 |                  |      | interactions, and sensitivity analyses                               |       |
| 26 |                  |      |                                                                      |       |
| 27 |                  |      |                                                                      |       |
| 28 | Key results      | #18  | Summarise key results with reference to study objectives             | 22    |
| 29 |                  |      |                                                                      |       |
| 30 | Limitations      | #19  | Discuss limitations of the study, taking into account sources of     | 24-25 |
| 31 |                  |      | potential bias or imprecision. Discuss both direction and            |       |
| 32 |                  |      | magnitude of any potential bias.                                     |       |
| 33 |                  |      |                                                                      |       |
| 34 |                  |      |                                                                      |       |
| 35 |                  |      |                                                                      |       |
| 36 | Interpretation   | #20  | Give a cautious overall interpretation considering objectives,       | 22-24 |
| 37 |                  |      | limitations, multiplicity of analyses, results from similar studies, |       |
| 38 |                  |      | and other relevant evidence.                                         |       |
| 39 |                  |      |                                                                      |       |
| 40 |                  |      |                                                                      |       |
| 41 | Generalisability | #21  | Discuss the generalisability (external validity) of the study        | 25    |
| 42 |                  |      | results                                                              |       |
| 43 |                  |      |                                                                      |       |
| 44 |                  |      |                                                                      |       |
| 45 | Funding          | #22  | Give the source of funding and the role of the funders for the       | 26    |
| 46 |                  |      | present study and, if applicable, for the original study on which    |       |
| 47 |                  |      | the present article is based                                         |       |
| 48 |                  |      |                                                                      |       |
| 49 |                  |      |                                                                      |       |

The STROBE checklist is distributed under the terms of the Creative Commons Attribution License CC-BY. This checklist was completed on 09. March 2018 using <http://www.goodreports.org/>, a tool made by the [EQUATOR Network](#) in collaboration with [Penelope.ai](#)

# BMJ Open

## The association between sleep duration, quality and food consumption in adolescent: A cross-sectional study using the Korea Youth Risk Behavior Web-based Survey

|                                 |                                                                                                                                                                                                                                                                                                                                                                                                                                                                                                                                                                                                                                                                                                                                                                                                                               |
|---------------------------------|-------------------------------------------------------------------------------------------------------------------------------------------------------------------------------------------------------------------------------------------------------------------------------------------------------------------------------------------------------------------------------------------------------------------------------------------------------------------------------------------------------------------------------------------------------------------------------------------------------------------------------------------------------------------------------------------------------------------------------------------------------------------------------------------------------------------------------|
| Journal:                        | <i>BMJ Open</i>                                                                                                                                                                                                                                                                                                                                                                                                                                                                                                                                                                                                                                                                                                                                                                                                               |
| Manuscript ID                   | bmjopen-2018-022848.R1                                                                                                                                                                                                                                                                                                                                                                                                                                                                                                                                                                                                                                                                                                                                                                                                        |
| Article Type:                   | Research                                                                                                                                                                                                                                                                                                                                                                                                                                                                                                                                                                                                                                                                                                                                                                                                                      |
| Date Submitted by the Author:   | 14-Apr-2018                                                                                                                                                                                                                                                                                                                                                                                                                                                                                                                                                                                                                                                                                                                                                                                                                   |
| Complete List of Authors:       | Min, Chanyang; Hallym Data Science Laboratory, Hallym University College of Medicine; Graduate School of Public Health, Seoul National University<br>Kim, Hyung-Jong; Department of Otorhinolaryngology-Head & Neck Surgery, Hallym University College of Medicine<br>Park, Il-Seok; Department of Otorhinolaryngology-Head & Neck Surgery, Hallym University College of Medicine<br>Park, Bumjung; Department of Otorhinolaryngology-Head & Neck Surgery<br>Kim, Jin-Hwan; Department of Otorhinolaryngology-Head & Neck Surgery, Hallym University College of Medicine<br>Sim, Songyong; Department of statistics, Hallym University<br>Choi, Hyo Geun; Hallym Data Science Laboratory, Hallym University College of Medicine; Department of Otorhinolaryngology-Head & Neck Surgery, Hallym University College of Medicine |
| <b>Primary Subject Heading</b>: | Public health                                                                                                                                                                                                                                                                                                                                                                                                                                                                                                                                                                                                                                                                                                                                                                                                                 |
| Secondary Subject Heading:      | Nutrition and metabolism, Epidemiology                                                                                                                                                                                                                                                                                                                                                                                                                                                                                                                                                                                                                                                                                                                                                                                        |
| Keywords:                       | NUTRITION & DIETETICS, PUBLIC HEALTH, PREVENTIVE MEDICINE                                                                                                                                                                                                                                                                                                                                                                                                                                                                                                                                                                                                                                                                                                                                                                     |
|                                 |                                                                                                                                                                                                                                                                                                                                                                                                                                                                                                                                                                                                                                                                                                                                                                                                                               |

SCHOLARONE™  
Manuscripts

1  
2  
3  
4 1 **The association between sleep duration, quality and food**  
5  
6  
7 2 **consumption in adolescent: A cross-sectional study using**  
8  
9  
10 3 **the Korea Youth Risk Behavior Web-based Survey**  
11  
12  
13  
14 4

15 5 Chanyang Min<sup>1,2</sup>, Hyung-Jong Kim<sup>3</sup>, Il-Seok Park<sup>4</sup>, Bumjung Park<sup>3</sup>, Jin-Hwan Kim<sup>5</sup>,  
16  
17 6 Songyong Sim<sup>6\*</sup>, Hyo Geun Choi<sup>1,3\*</sup>  
18  
19

20 7  
21  
22 8 <sup>1</sup>Hallym Data Science Laboratory, Hallym University College of Medicine, Anyang, Korea  
23  
24

25 9 <sup>2</sup>Graduate School of Public Health, Seoul National University, Seoul, Korea  
26  
27

28 10 <sup>3</sup>Department of Otorhinolaryngology-Head & Neck Surgery, Hallym University College of  
29  
30 11 Medicine, Anyang, Korea  
31

32 12 <sup>4</sup>Department of Otorhinolaryngology-Head & Neck Surgery, Hallym University College of  
33  
34 13 Medicine, Dongtan, Korea  
35  
36

37 14 <sup>5</sup>Department of Otorhinolaryngology-Head & Neck Surgery, Hallym University College of  
38  
39 15 Medicine, Seoul, Korea  
40  
41

42 16 <sup>6</sup>Department of statistics, Hallym University, Chuncheon, Korea.  
43  
44

45 17  
46  
47  
48 18 Word count: 3,144  
49  
50

51 19  
52  
53 20 \* Corresponding author  
54

1  
2  
3  
4 21 Name: Hyo Geun Choi

5  
6 22 Department of Otorhinolaryngology-Head & Neck Surgery, Hallym University Sacred Heart

7  
8 23 Hospital, 22, Gwanpyeong-ro 170beon-gil, Dongan-gu, Anyang-si, Gyeonggi-do, 14068

9  
10 24 Republic of Korea

11  
12 25 Tel: 82-31-380-3849

13  
14 26 Fax: 82-31-386-3860

15  
16 27 Email: pupen@naver.com

17  
18  
19 28

20  
21 29 \*Songyong Sim and Hyo Geun Choi are equally contributed in this study

22  
23  
24 30  
25  
26  
27  
28  
29  
30  
31  
32  
33  
34  
35  
36  
37  
38  
39  
40  
41  
42  
43  
44  
45  
46  
47  
48  
49  
50  
51  
52  
53  
54  
55  
56  
57  
58  
59  
60

1  
2  
3  
4 31 **ABSTRACT**

5  
6 32 Objective: This study examined the relationship between sleep duration and quality and food  
7  
8  
9 33 consumption among adolescents.

10  
11 34 Design: Cross-sectional study.

12  
13  
14 35 Setting: Data from the 2014 and 2015 Korea Youth Risk Behavior Web-based Survey were  
15  
16 36 used.

17  
18  
19 37 Participants: Participants of 12-18 years old (n = 118,462 [59,431 males, 59,031 females])  
20  
21 38 were selected.

22  
23  
24 39 Primary and secondary outcome measures: Sleep duration, sleep quality and the frequencies  
25  
26 40 of fruits, soda, soft drinks, fast food, instant noodle, confectionaries, vegetables, and milk  
27  
28 41 consumption.

29  
30  
31 42 Results: Short sleep durations (< 6 h) were associated with higher soft drinks and  
32  
33 43 confectionaries intake than longer sleep durations (9+ h) (adjusted odds ratios, AORs [95%  
34  
35 44 confidence intervals, CIs] for  $\geq 5$  times a week for soft drinks, 1.73 [1.57-1.91] and  
36  
37 45 confectionaries, 1.32 [1.20-1.46];  $P < 0.001$ ). Poor sleep quality, with 7-8 h of sleep, was  
38  
39 46 associated with a lower intake of fruits, vegetables and milk (AORs [95% CIs] for  $\geq 5$  times a  
40  
41 47 week for fruits, 0.71 [0.65-0.77]; vegetables, 0.66 [0.58-0.75]; and milk, 0.80 [0.74-0.86];  
42  
43 48 each  $P < 0.001$ ), and higher intake of soda, soft drinks, fast food, instant noodle and  
44  
45 49 confectionaries (AORs [95% CIs] for  $\geq 5$  times a week for soda, 1.55 [1.40-1.70]; soft drinks,  
46  
47 50 1.58 [1.43-1.73]; fast food, 1.97 [1.65-2.35]; instant noodle, 1.55 [1.37-1.76]; and  
48  
49 51 confectionaries, 1.30 [1.18-1.43]; each  $P < 0.001$ ) than good sleep quality of the same  
50  
51 52 duration.  
52  
53  
54

1  
2  
3  
4 53 Conclusion: Short sleep durations and poor sleep quality might be associated with higher  
5  
6 54 consumption of unhealthier foods, such as sugar-sweetened beverages, fast food, instant  
7  
8 55 noodle and confectionaries, and associated with lower consumption of fruits, vegetables and  
9  
10 56 milk.

11  
12  
13 57 Key words: sleep duration, sleep quality, food consumption, food frequency, sugar-sweetened  
14  
15 58 beverages, fast food, fruits, vegetables, adolescents, Korean

16  
17  
18 59  
19  
20  
21 60



1  
2  
3  
4 61 **STRENGTHS AND LIMITATIONS OF THIS STUDY**

- 5  
6 62 ♦ Our study was conducted on a representative population of Korean adolescents.  
7  
8  
9 63 ♦ We considered numerous socio-economic status variables as confounding factors to  
10  
11 64 investigate the independent relationship between sleep status and food consumption.  
12  
13  
14 65 ♦ We considered not only sleep duration but also sleep quality in explaining sleep  
15  
16 66 status.  
17  
18  
19 67 ♦ Our study was based on secondary data and it has some limitations in providing  
20  
21 68 specific information.  
22  
23  
24 69 ♦ Because the data were collected based on a self-reported questionnaire, the precision  
25  
26 70 of the information may be low.  
27  
28

29 71  
30  
31  
32  
33  
34  
35  
36  
37  
38  
39  
40  
41  
42  
43  
44  
45  
46  
47  
48  
49  
50  
51  
52  
53  
54  
55  
56  
57  
58  
59  
60

## 72 INTRODUCTION

73 Sufficient sleep in adolescents is important to maintain good health status and school  
74 performance. According to the National Sleep Foundation <sup>1</sup>, approximately 8 to 10 hours of  
75 sleep a night is best for adolescents. However, sleep durations for adolescents have been  
76 declining. <sup>2</sup> The reasons for decreasing sleep durations and reduced sleep quality among  
77 adolescents have been suggested to be associated with increased use of the internet and social  
78 media, and earlier school start times. <sup>3 4</sup> Inadequate sleep durations or quality could lead to  
79 poor school performance, physical health problems such as atopic conditions, headaches,  
80 mental health problems, and unhealthy behaviors. <sup>4-7</sup>

81 One of the outcomes of sleep deprivation among adolescents is obesity <sup>8</sup>, which has  
82 become a serious public health problem worldwide. <sup>9</sup> The fundamental factor leading to  
83 obesity is an energy imbalance between the calories consumed and the calories expended <sup>10</sup>;  
84 therefore, dietary factors are closely related to the prevalence of obesity <sup>11 12</sup> and are  
85 considered as a potential link between sleep deprivation and obesity in adolescents.  
86 According to previous studies, the intake of fruits, vegetables and milk have a positive  
87 association, and the intake of sweets, snacks and fast food a negative association with sleep  
88 duration. <sup>13-15</sup> In short, adolescents who get less sleep may be more likely to consume more  
89 calories in the form of fast foods, sweets and snacks, and fewer micronutrients than  
90 adolescents who get more sleep. Previous studies demonstrated that one of the possible  
91 reasons for sleep deprivation in association with the consumption of higher energy foods  
92 might be changes in hormones such as decreased leptin and increased ghrelin levels, which  
93 can lead to an increase in appetite. <sup>16 17</sup> In summary, sleep deprivation in adolescents might  
94 affect dietary habits as a factor of health problems including obesity.

1  
2  
3  
4 95 In Korea, the prevalence of childhood obesity in males and females was 15.3% and 11.1%  
5  
6 96 in 2016, respectively and it increased steadily since 2010.<sup>18</sup> Lee, who performed a study  
7  
8 97 using the Korea Youth Risk Behavior Web-based Survey (KYRBWS), reported that < 7 h of  
9  
10 98 sleep per night in high school students was associated with increased cracker consumption.<sup>19</sup>  
11  
12

13 99 Meanwhile, studies of sleep deprivation should consider not only sleep duration but also  
14  
15 100 sleep quality. However, few studies have investigated the relationship between sleep duration,  
16  
17 101 along with sleep quality, and the intake of various foods while also adjusting for the  
18  
19 102 numerous confounding factors among adolescents in population-based datasets. Lee utilized  
20  
21 103 KYRBWS data which is population-based datasets with containing numerous variables, she  
22  
23 104 did not consider the sleep quality.<sup>19</sup> The aim of our study was to identify the associations  
24  
25 105 between sleep duration and quality and food intake among adolescents by using KYRBWS  
26  
27 106 datasets. We utilized the data of the participants' level of recovery from fatigue after sleeping  
28  
29 107 as sleep quality. We obtained consistent results for assessing the associations between sleep  
30  
31 108 duration and quality, and the consumption of fruits, soda, soft drinks, fast food, instant noodle,  
32  
33 109 confectionaries, vegetables, and milk with previous studies.<sup>13-15 19</sup>  
34  
35  
36  
37  
38  
39

## 40 111 **MATERIALS AND METHODS**

### 41 112 **Data collection**

42  
43  
44  
45 113 The Institutional Review Board (IRB) of the Centers for Disease Control and Prevention of  
46  
47 114 Korea (KCDC) approved this study (2014-06EXP-02-P-A). Written, informed consent was  
48  
49 115 obtained from each participant prior to the survey. Because this web-based survey was  
50  
51 116 performed at schools and included a large number of participants, informed consent from  
52  
53  
54

1  
2  
3  
4 117 their parents was exempted. This consent procedure was approved by the IRB of KCDC.  
5  
6

7 118 This was a cross-sectional study using data from the KYRBWS, covering only Korea and  
8  
9 119 using statistical methods based on a designed sampling method and adjusted, weighted values.  
10  
11 120 The results from the KYRBWS conducted in 2014 and 2015 were analyzed. The data were  
12  
13 121 collected by the KCDC.  
14  
15

16 122

### 17 18 19 123 **Public Involvement**

20  
21 124 The survey consists of 125 questions assessing demographic characteristics and health-related  
22  
23 125 behaviors. Korean adolescents from the 7<sup>th</sup> through 12<sup>th</sup> grade completed the self-  
24  
25 126 administered questionnaire voluntarily and anonymously. Using 43 regions (considering  
26  
27 127 administrative districts, geographic accessibility, the number of schools, and population size)  
28  
29 128 and the school participants attended, the mother population was stratified into 129 levels to  
30  
31 129 identify the sample distribution. Groups were then selected using stratified, two-stage  
32  
33 130 (schools and classes) clustered sampling based on data from the Education Ministry.  
34  
35 131 Sampling was weighted by statisticians, who performed a post-stratification step and  
36  
37 132 considered non-response rates and extreme values. Detailed methods are described at the  
38  
39 133 KYRBWS website (<https://yhs.cdc.go.kr/new/pages/main.asp>).  
40  
41  
42

43 134 Of a total of 140,103 participants, we excluded the following participants from analysis in  
44  
45 135 this study; participants who slept less than 3 h or more than 12 h per night or who had no  
46  
47 136 sleep records (18,594 participants); participants who did not give their age (403 participants);  
48  
49 137 and participants without height or weight data (2,644 participants). Finally, 118,462  
50  
51 138 participants (84.5% of total participants; 59,431 males; 59,031 females; 12 to 18 years old)  
52  
53  
54

1  
2  
3  
4 139 were included in this study (Figure 1).  
5  
6

7 140  
8

### 9 141 **Sleep duration and quality**

10  
11

12 142 The times at which participants fall asleep and wake up were recorded to within 10 min. The  
13  
14 143 participants were asked the time they fall asleep and the time they wake up for the 7 most  
15  
16 144 recent days classified into weekdays and weekends. Sleep duration was calculated by  
17  
18 145 subtracting the time they fall asleep from the time they wake up. The mean daily sleep  
19  
20 146 duration was calculated by adding weekday and weekend sleep durations with weights of 5/7  
21  
22 147 and 2/7, respectively. Sleep duration was divided into five groups: < 6 h (6(-) h), ≥ 6 h and <  
23  
24 148 7 h (6 h), ≥ 7 h and < 8 h (7 h), ≥ 8 h and < 9 h (8 h), and ≥ 9 h (9+ h). The participants were  
25  
26 149 asked about their recovery from fatigue after sleeping for the 7 most recent days (quality of  
27  
28 150 sleep). The answer options were very good, good, moderate, poor, and very poor. We  
29  
30 151 regrouped answers into three groups of sleep quality to simplify the categories: good (very  
31  
32 152 good and good), moderate, and poor (poor and very poor). We analyzed the association  
33  
34 153 between sleep quality and food consumption only in the 7 h and 8 h groups as sleep duration  
35  
36 154 was closely related to its quality (S1 Table).  
37  
38  
39  
40

41 155  
42

### 43 156 **Food intake frequency**

44  
45

46 157 The KCDC collected the participants' certain food intake frequencies in the 7 most recent  
47  
48 158 days. The foods were fruits (not fruit juice), soda, soft drinks (including sports drinks, coffee-  
49  
50 159 based beverages, and fruit drinks; excluding soda), fast food (such as pizza, hamburgers, or  
51  
52 160 chicken), instant noodle, confectionaries, vegetables and milk. The data were divided into 4  
53  
54

1  
2  
3  
4 161 groups:  $\geq 5$  times a week, 3-4 times a week, 1-2 times a week, and 0 time a week.  
5  
6

7 162  
8

9 163 **Health examination and socio-economic status**  
10

11  
12 164 The participants were asked their weight (kg) and height (cm). Obesity levels were  
13  
14 165 categorized into 4 groups according to the Centers for Disease Control and Prevention  
15  
16 166 guidelines regarding body mass index (BMI,  $\text{kg}/\text{m}^2$ ) for children and teens<sup>20</sup> as follows:  
17  
18 167 obese,  $\geq 95^{\text{th}}$  percentile; overweight,  $\geq 85^{\text{th}}$  percentile and  $< 95^{\text{th}}$  percentile; healthy weight,  $\geq$   
19  
20 168  $5^{\text{th}}$  percentile and  $< 85^{\text{th}}$  percentile; and underweight,  $< 5^{\text{th}}$  percentile. The region of residence  
21  
22 169 was divided into 3 groups by administrative district: large city, small city, and rural area.  
23  
24 170 Subjective self-assessments of health were divided into 5 groups, from very good to very bad.  
25  
26 171 The stress level of participants was divided into 5 groups: severe, moderate, mild, a little, and  
27  
28 172 no stress. Self-reported economic level was grouped into 5 levels, from the highest to lowest.  
29  
30 173 Parent educational level was divided into 4 groups: graduated college or higher, graduated  
31  
32 174 high school, graduated middle school or below, unknown, and no parents. The participants  
33  
34 175 who did not know the educational level of their parents or who had no parents were not  
35  
36 176 excluded as this could have increased the number missing values for participants of relatively  
37  
38 177 lower economic levels.  
39  
40  
41  
42  
43  
44  
45

46 178

47 179 **Statistical Analysis**  
48

49 180 Differences in the general characteristics according to sleep duration were calculated using  
50  
51 181 linear regression analysis with complex sampling for age. The rate differences in relation to  
52  
53 182 sex, region of residence, economic level, educational level of parents, stress level, food  
54

1  
2  
3  
4 183 consumption, and quality of sleep were compared using chi-square tests with Rao-Scott  
5  
6 184 corrections.

7  
8  
9 185 Adjusted odd ratios (AORs) for sleep duration in relation to food consumption were  
10  
11 186 calculated using multinomial logistic regression analysis with complex sampling for adjusted  
12  
13 187 covariates (age, sex, obesity, region of residence, stress level, economic level, and  
14  
15 188 educational level of parents).

16  
17  
18 189 AORs for sleep quality in relation to food consumption were calculated using  
19  
20 190 multinomial logistic regression analysis with complex sampling for adjusted covariates in the  
21  
22 191 7 h and 8 h groups.

23  
24  
25 192 Two-tailed analyses were conducted. P-values lower than 0.05 were considered to  
26  
27 193 indicate significance, and 95% confidence intervals (CIs) were calculated. The weighted  
28  
29 194 values recommended by the KYRBWS were applied, and all results are presented as  
30  
31 195 weighted values. The results were analyzed using SPSS ver. 21.0 (IBM, Armonk, NY, USA).

32  
33  
34 196

## 35 36 37 197 **RESULTS**

38  
39  
40 198 Analysis of the general characteristics of the study participants shows that an older age, being  
41  
42 199 female, reporting being healthy, living in a large city, feeling severe or moderate stress, being  
43  
44 200 at a lower economic level, and having higher parental educational levels were associated with  
45  
46 201 shorter sleep durations (all P values < 0.001, Table 1).

47  
48  
49 202

50  
51 203 **Table 1. General characteristics of participants according to sleep duration.**

| Factors         | Total | Sleep duration |        |        |        |        | P-value |
|-----------------|-------|----------------|--------|--------|--------|--------|---------|
|                 |       | 6(-) h         | 6 h    | 7 h    | 8 h    | 9+ h   |         |
| Number          |       |                |        |        |        |        |         |
| n               | 118,4 | 27,409         | 29,773 | 30,254 | 20,743 | 10,283 |         |
|                 | 62    |                |        |        |        |        |         |
| %               | 100   | 23.1           | 25.1   | 25.5   | 17.5   | 8.7    |         |
| Mean Age (year, | 15.0  | 16.1           | 15.5   | 14.7   | 13.9   | 14.0   | <0.001* |
| SD)             | (1.7) | (1.5)          | (1.6)  | (1.6)  | (1.5)  | (1.6)  |         |
| Sex (%)         |       |                |        |        |        |        | <0.001† |
| Male            | 50.2  | 41.8           | 47.7   | 52.3   | 57.1   | 59.5   |         |
| Female          | 49.8  | 58.2           | 52.3   | 47.7   | 42.9   | 40.5   |         |
| Obesity (%)     |       |                |        |        |        |        | <0.001† |
| Underweight     | 6.1   | 5.9            | 6.2    | 6.0    | 6.2    | 6.9    |         |
| Healthy         | 78.8  | 80.3           | 79.5   | 78.1   | 77.8   | 76.5   |         |
| Overweight      | 11.3  | 10.8           | 10.8   | 11.8   | 11.8   | 11.8   |         |
| Obese           | 3.8   | 3.0            | 3.5    | 4.1    | 4.2    | 4.8    |         |
| Region (%)      |       |                |        |        |        |        | <0.001† |
| Large City      | 44.7  | 49.4           | 46.6   | 43.3   | 40.6   | 39.0   |         |
| Small City      | 47.3  | 44.5           | 46.4   | 48.1   | 49.8   | 50.1   |         |
| Rural Area      | 8.0   | 6.1            | 7.1    | 8.6    | 9.6    | 10.9   |         |
| Stress (%)      |       |                |        |        |        |        | <0.001† |
| Severe          | 8.9   | 13.7           | 9.3    | 7.1    | 5.7    | 7.1    |         |
| Moderate        | 27.3  | 34.4           | 29.1   | 25.0   | 21.4   | 21.7   |         |



|    |                    |      |      |      |      |      |         |
|----|--------------------|------|------|------|------|------|---------|
| 1  |                    |      |      |      |      |      |         |
| 2  |                    |      |      |      |      |      |         |
| 3  |                    |      |      |      |      |      |         |
| 4  | Mild               | 43.8 | 39.9 | 45.1 | 45.8 | 44.8 | 42.8    |
| 5  |                    |      |      |      |      |      |         |
| 6  | A little           | 16.6 | 10.1 | 14.3 | 18.8 | 23.0 | 21.9    |
| 7  |                    |      |      |      |      |      |         |
| 8  | No                 | 3.3  | 1.9  | 2.3  | 3.3  | 5.2  | 6.6     |
| 9  |                    |      |      |      |      |      |         |
| 10 | Economic Level (%) |      |      |      |      |      | <0.001† |
| 11 |                    |      |      |      |      |      |         |
| 12 | Highest            | 8.1  | 7.3  | 6.9  | 7.9  | 9.5  | 11.1    |
| 13 |                    |      |      |      |      |      |         |
| 14 | Middle High        | 26.5 | 26.7 | 25.5 | 25.7 | 28.1 | 27.7    |
| 15 |                    |      |      |      |      |      |         |
| 16 | Middle             | 48.3 | 46.9 | 48.9 | 49.5 | 48.3 | 46.3    |
| 17 |                    |      |      |      |      |      |         |
| 18 | Middle Low         | 14.0 | 15.2 | 15.2 | 13.9 | 11.8 | 11.9    |
| 19 |                    |      |      |      |      |      |         |
| 20 | Lowest             | 3.2  | 3.9  | 3.5  | 3.0  | 2.3  | 3.0     |
| 21 |                    |      |      |      |      |      |         |
| 22 |                    |      |      |      |      |      |         |
| 23 | Educational level, |      |      |      |      |      | <0.001† |
| 24 |                    |      |      |      |      |      |         |
| 25 | Father (%)         |      |      |      |      |      |         |
| 26 |                    |      |      |      |      |      |         |
| 27 | Unknown            | 19.7 | 12.8 | 16.0 | 21.9 | 26.6 | 28.5    |
| 28 |                    |      |      |      |      |      |         |
| 29 | Middle School      | 2.7  | 2.6  | 2.8  | 2.8  | 2.4  | 2.6     |
| 30 |                    |      |      |      |      |      |         |
| 31 | High School        | 29.2 | 28.8 | 30.5 | 30.3 | 27.5 | 26.9    |
| 32 |                    |      |      |      |      |      |         |
| 33 | College, or over   | 48.4 | 55.8 | 50.8 | 45.0 | 43.6 | 42.0    |
| 34 |                    |      |      |      |      |      |         |
| 35 |                    |      |      |      |      |      |         |
| 36 | Educational level, |      |      |      |      |      | <0.001† |
| 37 |                    |      |      |      |      |      |         |
| 38 | Mother (%)         |      |      |      |      |      |         |
| 39 |                    |      |      |      |      |      |         |
| 40 | Unknown            | 18.9 | 12.0 | 15.2 | 21.0 | 25.8 | 28.1    |
| 41 |                    |      |      |      |      |      |         |
| 42 | Middle School      | 2.3  | 2.3  | 2.5  | 2.3  | 2.0  | 2.2     |
| 43 |                    |      |      |      |      |      |         |
| 44 | High School        | 37.1 | 39.1 | 39.3 | 37.1 | 33.7 | 31.8    |
| 45 |                    |      |      |      |      |      |         |
| 46 | College, or over   | 41.7 | 46.7 | 43.0 | 39.6 | 38.5 | 37.9    |
| 47 |                    |      |      |      |      |      |         |
| 48 |                    |      |      |      |      |      |         |

204 \* Linear regression analysis with complex sampling, Significance at  $P < 0.05$

205 † Chi-square test with Rao-Scott correction, Significance at  $P < 0.05$

206

207 Higher frequencies of instant noodle, fruits, vegetables, and milk intake were associated  
 208 with longer sleep durations, while higher frequencies of soda, soft drinks, fast food, and  
 209 confectionaries intake were associated with shorter sleep durations (all P values < 0.001,  
 210 Table 2).

211 **Table 2. Food consumption of participants according to sleep duration.**

| Factors          | Sleep duration |        |      |      |      |      | P-value |
|------------------|----------------|--------|------|------|------|------|---------|
|                  | Total          | 6(-) h | 6 h  | 7 h  | 8 h  | 9+ h |         |
| Fruits (%)       |                |        |      |      |      |      | <0.001* |
| ≥5 times a week  | 33.4           | 33.4   | 31.9 | 32.5 | 35.6 | 35.8 |         |
| 3-4 times a week | 28.9           | 28.2   | 29.0 | 29.2 | 29.4 | 28.0 |         |
| 1-2 times a week | 29.5           | 30.1   | 30.8 | 29.9 | 27.0 | 27.9 |         |
| 0 time a week    | 8.3            | 8.3    | 8.3  | 8.4  | 8.0  | 8.7  |         |
| Soda (%)         |                |        |      |      |      |      | <0.001* |
| ≥5 times a week  | 8.0            | 8.3    | 8.1  | 8.0  | 7.7  | 8.0  |         |
| 3-4 times a week | 18.2           | 17.2   | 18.8 | 18.8 | 18.2 | 17.4 |         |
| 1-2 times a week | 48.9           | 48.0   | 49.0 | 49.8 | 49.0 | 48.0 |         |
| 0 time a week    | 24.9           | 26.5   | 24.2 | 23.4 | 25.1 | 26.6 |         |
| Soft drinks (%)  |                |        |      |      |      |      | <0.001* |
| ≥5 times a week  | 13.9           | 16.3   | 14.5 | 13.1 | 12.0 | 11.6 |         |
| 3-4 times a week | 25.9           | 26.7   | 26.5 | 26.0 | 24.7 | 24.0 |         |
| 1-2 times a week | 44.1           | 42.2   | 43.9 | 44.8 | 45.6 | 44.6 |         |
| 0 time a week    | 16.1           | 14.7   | 15.0 | 16.1 | 17.7 | 19.8 |         |

|    |                     |      |      |      |      |      |      |         |
|----|---------------------|------|------|------|------|------|------|---------|
| 1  |                     |      |      |      |      |      |      |         |
| 2  |                     |      |      |      |      |      |      |         |
| 3  |                     |      |      |      |      |      |      |         |
| 4  | Fast food (%)       |      |      |      |      |      |      | <0.001* |
| 5  |                     |      |      |      |      |      |      |         |
| 6  | ≥5 times a week     | 2.5  | 2.8  | 2.6  | 2.2  | 2.2  | 2.7  |         |
| 7  |                     |      |      |      |      |      |      |         |
| 8  | 3-4 times a week    | 11.9 | 12.6 | 12.8 | 11.7 | 10.6 | 10.7 |         |
| 9  |                     |      |      |      |      |      |      |         |
| 10 | 1-2 times a week    | 59.8 | 60.0 | 60.7 | 60.5 | 58.8 | 56.2 |         |
| 11 |                     |      |      |      |      |      |      |         |
| 12 | 0 time a week       | 25.8 | 24.6 | 23.8 | 25.5 | 28.3 | 30.3 |         |
| 13 |                     |      |      |      |      |      |      |         |
| 14 | Instant noodle (%)  |      |      |      |      |      |      | <0.001* |
| 15 |                     |      |      |      |      |      |      |         |
| 16 | ≥5 times a week     | 4.6  | 4.4  | 4.3  | 4.8  | 4.8  | 5.4  |         |
| 17 |                     |      |      |      |      |      |      |         |
| 18 | 3-4 times a week    | 17.6 | 15.0 | 16.9 | 18.6 | 19.7 | 18.6 |         |
| 19 |                     |      |      |      |      |      |      |         |
| 20 | 1-2 times a week    | 51.6 | 49.8 | 51.9 | 52.4 | 52.6 | 51.3 |         |
| 21 |                     |      |      |      |      |      |      |         |
| 22 | 0 time a week       | 26.2 | 30.8 | 26.9 | 24.2 | 22.9 | 24.6 |         |
| 23 |                     |      |      |      |      |      |      |         |
| 24 |                     |      |      |      |      |      |      |         |
| 25 | Confectionaries (%) |      |      |      |      |      |      | <0.001* |
| 26 |                     |      |      |      |      |      |      |         |
| 27 | ≥5 times a week     | 10.7 | 12.2 | 11.1 | 9.9  | 9.7  | 9.7  |         |
| 28 |                     |      |      |      |      |      |      |         |
| 29 | 3-4 times a week    | 26.4 | 27.1 | 26.9 | 26.4 | 25.5 | 24.4 |         |
| 30 |                     |      |      |      |      |      |      |         |
| 31 | 1-2 times a week    | 45.4 | 44.3 | 45.6 | 45.9 | 45.9 | 45.6 |         |
| 32 |                     |      |      |      |      |      |      |         |
| 33 | 0 time a week       | 17.6 | 16.5 | 16.5 | 17.8 | 18.9 | 20.3 |         |
| 34 |                     |      |      |      |      |      |      |         |
| 35 |                     |      |      |      |      |      |      |         |
| 36 | Vegetables (%)      |      |      |      |      |      |      | <0.001* |
| 37 |                     |      |      |      |      |      |      |         |
| 38 | ≥5 times a week     | 56.6 | 57.3 | 55.4 | 55.4 | 57.8 | 58.7 |         |
| 39 |                     |      |      |      |      |      |      |         |
| 40 | 3-4 times a week    | 24.1 | 23.8 | 24.5 | 25.1 | 23.2 | 22.6 |         |
| 41 |                     |      |      |      |      |      |      |         |
| 42 | 1-2 times a week    | 15.7 | 15.0 | 16.4 | 16.1 | 15.6 | 14.9 |         |
| 43 |                     |      |      |      |      |      |      |         |
| 44 | 0 time a week       | 3.6  | 4.0  | 3.7  | 3.4  | 3.4  | 3.8  |         |
| 45 |                     |      |      |      |      |      |      |         |
| 46 |                     |      |      |      |      |      |      |         |
| 47 | Milk (%)            |      |      |      |      |      |      | <0.001* |
| 48 |                     |      |      |      |      |      |      |         |
| 49 | ≥5 times a week     | 41.9 | 36.7 | 38.4 | 42.9 | 48.4 | 50.4 |         |
| 50 |                     |      |      |      |      |      |      |         |
| 51 | 3-4 times a week    | 20.0 | 20.3 | 20.4 | 20.2 | 19.6 | 18.2 |         |
| 52 |                     |      |      |      |      |      |      |         |
| 53 |                     |      |      |      |      |      |      |         |
| 54 |                     |      |      |      |      |      |      |         |
| 55 |                     |      |      |      |      |      |      |         |
| 56 |                     |      |      |      |      |      |      |         |
| 57 |                     |      |      |      |      |      |      |         |
| 58 |                     |      |      |      |      |      |      |         |
| 59 |                     |      |      |      |      |      |      |         |
| 60 |                     |      |      |      |      |      |      |         |

|                  |      |      |      |      |      |      |
|------------------|------|------|------|------|------|------|
| 1-2 times a week | 22.4 | 24.3 | 24.0 | 22.2 | 19.4 | 18.6 |
| 0 time a week    | 15.7 | 18.7 | 17.3 | 14.8 | 12.5 | 12.8 |

212 \* Chi-square test with Rao-Scott correction, Significance at  $P < 0.05$

213

214 Short sleep durations ( $< 6$  h) were associated with a higher intake of soft drinks (AOR  
 215 [95% CI] for  $\geq 5$  times a week, 1.73 [1.57-1.91];  $P < 0.001$ ) and with a higher intake of  
 216 confectionaries (AOR [95% CI] for  $\geq 5$  times a week, 1.32 [1.20-1.46];  $P < 0.001$ ). Soda and  
 217 fast food intake showed an increasing trend in the group getting  $< 6$  h of sleep. However, it  
 218 was not definite. Fruits, instant noodle, vegetables, and milk intake did not show an evident  
 219 association with getting  $< 6$  h of sleep per night despite the significant association with sleep  
 220 duration overall (Table 3). Unadjusted model was also analyzed (S2 Table).

221

222

223 **Table 3. Adjusted odd ratios of sleep duration for food consumption using multiple logistic regression analysis with complex sampling**  
 224 **(Reference of food frequency = 0 time a week).**

| Factors          | AOR (95% Confidence interval) of sleep duration |                  |                  |                  |      | P-value |
|------------------|-------------------------------------------------|------------------|------------------|------------------|------|---------|
|                  | 6(-) h                                          | 6 h              | 7 h              | 8 h              | 9+ h |         |
| Fruits (%)       |                                                 |                  |                  |                  |      | <0.001* |
| ≥5 times a week  | 1.07 (0.97-1.18)                                | 0.97 (0.89-1.06) | 0.95 (0.87-1.04) | 1.03 (0.94-1.12) | 1    |         |
| 3-4 times a week | 1.04 (0.94-1.15)                                | 1.05 (0.96-1.16) | 1.05 (0.95-1.15) | 1.11 (1.00-1.22) | 1    |         |
| 1-2 times a week | 0.98 (0.89-1.08)                                | 1.02 (0.92-1.12) | 1.03 (0.94-1.13) | 1.02 (0.92-1.12) | 1    |         |
| Soda (%)         |                                                 |                  |                  |                  |      | <0.001* |
| ≥5 times a week  | 1.27 (1.14-1.41)                                | 1.29 (1.17-1.42) | 1.27 (1.16-1.40) | 1.08 (0.97-1.19) | 1    |         |
| 3-4 times a week | 1.08 (1.00-1.17)                                | 1.25 (1.17-1.34) | 1.29 (1.21-1.38) | 1.13 (1.05-1.22) | 1    |         |
| 1-2 times a week | 1.00 (0.94-1.07)                                | 1.12 (1.06-1.18) | 1.20 (1.14-1.27) | 1.09 (1.03-1.16) | 1    |         |
| Soft drinks (%)  |                                                 |                  |                  |                  |      | <0.001* |
| ≥5 times a week  | 1.73 (1.57-1.91)                                | 1.57 (1.44-1.71) | 1.38 (1.26-1.50) | 1.16 (1.06-1.28) | 1    |         |

|    |                     |                  |                  |                  |                  |   |         |
|----|---------------------|------------------|------------------|------------------|------------------|---|---------|
| 1  |                     |                  |                  |                  |                  |   |         |
| 2  |                     |                  |                  |                  |                  |   |         |
| 3  |                     |                  |                  |                  |                  |   |         |
| 4  |                     |                  |                  |                  |                  |   |         |
| 5  | 3-4 times a week    | 1.36 (1.25-1.47) | 1.36 (1.37-1.46) | 1.28 (1.19-1.38) | 1.15 (1.07-1.24) | 1 |         |
| 6  |                     |                  |                  |                  |                  |   |         |
| 7  | 1-2 times a week    | 1.16 (1.09-1.25) | 1.22 (1.15-1.30) | 1.18 (1.11-1.26) | 1.14 (1.07-1.22) | 1 |         |
| 8  |                     |                  |                  |                  |                  |   |         |
| 9  | Fast food (%)       |                  |                  |                  |                  |   | <0.001* |
| 10 |                     |                  |                  |                  |                  |   |         |
| 11 | ≥5 times a week     | 1.12 (0.95-1.32) | 1.15 (0.99-1.34) | 0.95 (0.82-1.11) | 0.86 (0.74-1.00) | 1 |         |
| 12 |                     |                  |                  |                  |                  |   |         |
| 13 | 3-4 times a week    | 1.18 (1.08-1.29) | 1.31 (1.20-1.28) | 1.22 (1.12-1.32) | 1.07 (0.99-1.17) | 1 |         |
| 14 |                     |                  |                  |                  |                  |   |         |
| 15 | 1-2 times a week    | 1.12 (1.05-1.19) | 1.22 (1.15-1.28) | 1.22 (1.15-1.28) | 1.13 (1.07-1.19) | 1 |         |
| 16 |                     |                  |                  |                  |                  |   |         |
| 17 |                     |                  |                  |                  |                  |   |         |
| 18 | Instant noodle (%)  |                  |                  |                  |                  |   | <0.001* |
| 19 |                     |                  |                  |                  |                  |   |         |
| 20 | ≥5 times a week     | 1.09 (0.96-1.24) | 1.03 (0.91-1.17) | 1.07 (0.95-1.20) | 0.98 (0.87-1.11) | 1 |         |
| 21 |                     |                  |                  |                  |                  |   |         |
| 22 | 3-4 times a week    | 0.93 (0.86-1.01) | 1.06 (0.98-1.14) | 1.15 (1.07-1.23) | 1.17 (1.08-1.26) | 1 |         |
| 23 |                     |                  |                  |                  |                  |   |         |
| 24 | 1-2 times a week    | 0.92 (0.86-0.98) | 1.04 (0.98-1.10) | 1.09 (1.03-1.16) | 1.11 (1.04-1.18) | 1 |         |
| 25 |                     |                  |                  |                  |                  |   |         |
| 26 |                     |                  |                  |                  |                  |   |         |
| 27 | Confectionaries (%) |                  |                  |                  |                  |   | <0.001* |
| 28 |                     |                  |                  |                  |                  |   |         |
| 29 | ≥5 times a week     | 1.32 (1.20-1.46) | 1.28 (1.17-1.41) | 1.10 (1.00-1.20) | 1.06 (0.97-1.17) | 1 |         |
| 30 |                     |                  |                  |                  |                  |   |         |
| 31 | 3-4 times a week    | 1.20 (1.11-1.29) | 1.22 (1.13-1.31) | 1.16 (1.08-1.24) | 1.10 (1.02-1.18) | 1 |         |
| 32 |                     |                  |                  |                  |                  |   |         |
| 33 | 1-2 times a week    | 1.09 (1.12-1.17) | 1.15 (1.07-1.23) | 1.11 (1.04-1.18) | 1.08 (1.01-1.16) | 1 |         |
| 34 |                     |                  |                  |                  |                  |   |         |
| 35 | Vegetables (%)      |                  |                  |                  |                  |   | <0.001* |
| 36 |                     |                  |                  |                  |                  |   |         |
| 37 |                     |                  |                  |                  |                  |   |         |

1  
2  
3  
4  
5  
6  
7  
8  
9  
10  
11  
12  
13  
14  
15  
16  
17  
18  
19  
20  
21  
22  
23  
24  
25  
26  
27  
28  
29  
30  
31  
32  
33  
34  
35  
36  
37  
38  
39  
40  
41  
42  
43  
44  
45  
46  
47

|                  |                  |                  |                  |                  |         |
|------------------|------------------|------------------|------------------|------------------|---------|
| ≥5 times a week  | 0.96 (0.85-1.10) | 0.95 (0.83-1.07) | 1.04 (0.92-1.17) | 1.07 (0.94-1.22) | 1       |
| 3-4 times a week | 0.92 (0.80-1.05) | 0.98 (0.86-1.12) | 1.15 (1.02-1.30) | 1.10 (0.96-1.25) | 1       |
| 1-2 times a week | 0.91 (0.79-1.05) | 1.02 (0.90-1.17) | 1.17 (1.03-1.33) | 1.15 (1.01-1.33) | 1       |
| Milk (%)         |                  |                  |                  |                  | <0.001* |
| ≥5 times a week  | 0.99 (0.91-1.07) | 0.91 (0.85-0.98) | 0.92 (0.85-0.99) | 0.97 (0.89-1.04) | 1       |
| 3-4 times a week | 1.06 (0.97-1.15) | 1.04 (0.96-1.13) | 1.09 (1.00-1.18) | 1.09 (1.00-1.19) | 1       |
| 1-2 times a week | 1.01 (0.93-1.09) | 1.05 (0.97-1.14) | 1.06 (0.98-1.14) | 1.03 (0.95-1.12) | 1       |

\* Significance at P < 0.05

228 Sleep quality was also associated with the frequency of food intake. Poor quality of sleep  
 229 was associated with a lower intake of fruits, vegetables, and milk (AOR [95% CI] for  $\geq 5$   
 230 times a week for fruits, 0.71 [0.65-0.77]; vegetables, 0.66 [0.58-0.75]; and milk, 0.80 [0.74-  
 231 0.86]; each  $P < 0.001$ ). Poor sleep quality was also related with a higher intake of soda, soft  
 232 drinks, fast food, instant noodle, and confectionaries (AOR [95% CI] for  $\geq 5$  times a week for  
 233 soda, 1.55 [1.40-1.70]; soft drinks, 1.58 [1.43-1.73]; fast food, 1.97 [1.65-2.35]; instant  
 234 noodle, 1.55 [1.37-1.76]; and confectionaries, 1.30 [1.18-1.43]; each  $P < 0.001$ , Table 4).

235

236 **Table 4. Adjusted odd ratios of quality of sleep for food consumption using multiple**  
 237 **logistic regression analysis with complex sampling (Reference of food frequency = 0 time**  
 238 **a week) in 7 h and 8 h groups.**

| Factors               | Quality of sleep |                  |                  | P-value |
|-----------------------|------------------|------------------|------------------|---------|
|                       | Good             | Moderate         | Poor             |         |
| Fruits (%)            |                  |                  |                  | <0.001* |
| $\geq 5$ times a week | 1                | 0.81 (0.74-0.89) | 0.71 (0.65-0.77) |         |
| 3-4 times a week      | 1                | 0.93 (0.85-1.01) | 0.79 (0.72-0.87) |         |
| 1-2 times a week      | 1                | 1.00 (0.92-1.09) | 0.90 (0.82-0.99) |         |
| Soda (%)              |                  |                  |                  | <0.001* |
| $\geq 5$ times a week | 1                | 1.27 (1.16-1.40) | 1.55 (1.40-1.70) |         |
| 3-4 times a week      | 1                | 1.25 (1.16-1.33) | 1.35 (1.25-1.45) |         |
| 1-2 times a week      | 1                | 1.14 (1.08-1.20) | 1.15 (1.08-1.22) |         |
| Soft drinks (%)       |                  |                  |                  | <0.001* |



|    |                     |   |                  |                  |                            |
|----|---------------------|---|------------------|------------------|----------------------------|
| 1  |                     |   |                  |                  |                            |
| 2  |                     |   |                  |                  |                            |
| 3  |                     |   |                  |                  |                            |
| 4  | ≥5 times a week     | 1 | 1.24 (1.15-1.35) | 1.58 (1.43-1.73) |                            |
| 5  |                     |   |                  |                  |                            |
| 6  | 3-4 times a week    | 1 | 1.21 (1.13-1.29) | 1.36 (1.26-1.46) |                            |
| 7  |                     |   |                  |                  |                            |
| 8  | 1-2 times a week    | 1 | 1.09 (1.03-1.16) | 1.10 (1.03-1.18) |                            |
| 9  |                     |   |                  |                  |                            |
| 10 | Fast food (%)       |   |                  |                  | <0.001*                    |
| 11 |                     |   |                  |                  |                            |
| 12 | ≥5 times a week     | 1 | 1.26 (1.07-1.49) | 1.97 (1.65-2.35) |                            |
| 13 |                     |   |                  |                  |                            |
| 14 | 3-4 times a week    | 1 | 1.28 (1.19-1.38) | 1.49 (1.37-1.62) |                            |
| 15 |                     |   |                  |                  |                            |
| 16 | 1-2 times a week    | 1 | 1.11 (1.06-1.17) | 1.18 (1.11-1.25) |                            |
| 17 |                     |   |                  |                  |                            |
| 18 | Instant noodle (%)  |   |                  |                  | <0.001*                    |
| 19 |                     |   |                  |                  |                            |
| 20 | ≥5 times a week     | 1 | 1.29 (1.14-1.45) | 1.55 (1.37-1.76) |                            |
| 21 |                     |   |                  |                  |                            |
| 22 | 3-4 times a week    | 1 | 1.27 (1.19-1.36) | 1.31 (1.22-1.42) |                            |
| 23 |                     |   |                  |                  |                            |
| 24 | 1-2 times a week    | 1 | 1.14 (1.09-1.20) | 1.11 (1.05-1.18) |                            |
| 25 |                     |   |                  |                  |                            |
| 26 | Confectionaries (%) |   |                  |                  | <0.001*                    |
| 27 |                     |   |                  |                  |                            |
| 28 | ≥5 times a week     | 1 | 1.13 (1.03-1.23) | 1.30 (1.18-1.43) |                            |
| 29 |                     |   |                  |                  |                            |
| 30 | 3-4 times a week    | 1 | 1.12 (1.04-1.19) | 1.08 (1.01-1.17) |                            |
| 31 |                     |   |                  |                  |                            |
| 32 | 1-2 times a week    | 1 | 1.05 (0.99-1.12) | 1.00 (0.93-1.07) |                            |
| 33 |                     |   |                  |                  |                            |
| 34 | Vegetables (%)      |   |                  |                  | <0.001*                    |
| 35 |                     |   |                  |                  |                            |
| 36 | ≥5 times a week     | 1 | 0.97 (0.86-1.10) | 0.66 (0.58-0.75) |                            |
| 37 |                     |   |                  |                  |                            |
| 38 | 3-4 times a week    | 1 | 1.14 (1.00-1.30) | 0.78 (0.68-0.89) |                            |
| 39 |                     |   |                  |                  |                            |
| 40 | 1-2 times a week    | 1 | 1.30 (1.14-1.49) | 0.98 (0.85-1.12) |                            |
| 41 |                     |   |                  |                  |                            |
| 42 | Milk (%)            |   |                  |                  | <0.001*                    |
| 43 |                     |   |                  |                  |                            |
| 44 | ≥5 times a week     | 1 | 0.89 (0.83-0.95) | 0.80 (0.74-0.86) |                            |
| 45 |                     |   |                  |                  |                            |
| 46 | 3-4 times a week    | 1 | 1.01 (0.94-1.09) | 0.86 (0.79-0.93) |                            |
| 47 |                     |   |                  |                  |                            |
| 48 | 1-2 times a week    | 1 | 0.99 (0.92-1.06) | 0.91 (0.84-0.99) |                            |
| 49 |                     |   |                  |                  |                            |
| 50 |                     |   |                  |                  |                            |
| 51 |                     |   |                  |                  |                            |
| 52 |                     |   |                  |                  |                            |
| 53 |                     |   |                  |                  |                            |
| 54 | 239                 |   |                  |                  | * Significance at P < 0.05 |
| 55 |                     |   |                  |                  |                            |
| 56 |                     |   |                  |                  |                            |
| 57 |                     |   |                  |                  |                            |
| 58 |                     |   |                  |                  |                            |
| 59 |                     |   |                  |                  |                            |
| 60 |                     |   |                  |                  |                            |

240

241 **DISCUSSION**

242 We found that shorter sleep durations were associated with higher frequencies of consuming  
243 soft drinks and confectionaries than longer sleep durations. Additionally, poor sleep quality,  
244 with 7 to 8 h of sleep per night, was associated with a lower frequency of fruits, vegetables  
245 and milk intake, and a higher frequency of soda, soft drinks, fast food, instant noodle and  
246 confectionaries intake. Unlike in previous studies<sup>13-15 19</sup>, we found an association between  
247 not only sleep duration but also between sleep quality and the intake of various foods.

248 Along with these outcomes, sleep duration in association with sleep quality might affect  
249 one's appetite and even be related to health problems such as obesity<sup>21</sup> and diabetes.<sup>22</sup> A  
250 short sleep duration or poor sleep quality is associated with appetite-related hormonal  
251 changes such as lower leptin and higher ghrelin levels in previous studies. These results were  
252 also associated with greater energy intake and a higher BMI.<sup>16 17</sup> Baron et al. reported that  
253 people who fall asleep later sleep less and consume more calories than people who fall asleep  
254 earlier. Moreover, consuming calories after 8 pm was associated with a higher BMI.<sup>21</sup>  
255 Rudnicka et al. reported that shorter sleep durations in children were associated with a higher  
256 prevalence of risk factors for type 2 diabetes, such as increases in the fat mass index, insulin  
257 resistance and fasting glucose level.<sup>22</sup> Meanwhile, Doo et al. reported that participants with  
258 shorter sleep durations and a higher consumption of dietary antioxidant vitamins had a lower  
259 risk of obesity than those with a lower consumption of dietary antioxidant vitamins.<sup>23</sup> In  
260 summary, a short sleep duration in association with poor sleep quality could affect dietary  
261 habits and appetite, which could result in health problems. Nevertheless, people who sleep for  
262 shorter durations can reduce the risks of health problems by consuming foods rich in

1  
2  
3  
4 263 micronutrients such as vitamins.  
5

6 264 Although nutrient profiles were not available in our study, sugar-sweetened beverages  
7  
8 265 such as soda and soft drinks, confectionaries, fast food, and instant noodle have higher energy  
9  
10 266 levels but less micronutrients than fruits, vegetables, and milk. Sugar-sweetened beverages  
11  
12 267 contain mainly liquid calories provided by sugars and have very few of other nutrients. A  
13  
14 268 potential biological mechanism for sugar-sweetened beverages leading to obesity is that  
15  
16 269 liquid calories may result in decreased satiety, leading to the consumption of more sugar-  
17  
18 270 sweetened beverages with subsequent weight gain.<sup>24</sup>  
19  
20  
21

22 271 Fast food, confectionaries, and instant noodle contain high energy densities, with calories  
23  
24 272 derived from carbohydrates and fats and with minimal amounts of other nutrients.  
25  
26 273 Nevertheless, humans have a weak innate ability to recognize energy density, so humans fail  
27  
28 274 to down-regulation the consumption of most of these foods accordingly.<sup>25</sup> Obesity is one of  
29  
30 275 the risk factors of type 2 diabetes because it is related to an increase in insulin resistance.<sup>26</sup>  
31  
32 276 In fact, previous studies reported that sugar-sweetened beverage and fast food consumption  
33  
34 277 were associated with not only changes in bodyweight but also increased insulin resistance.<sup>24</sup>  
35  
36 278 <sup>27</sup>Hence, consumption of these foods could be a potential mechanistic link between sleep  
37  
38 279 duration in association with quality and health problems, including obesity and type 2  
39  
40 280 diabetes in adolescents.  
41  
42  
43

44 281 On the other hand, food intake might affect sleep duration and sleep quality. Fruits,  
45  
46 282 vegetables, and milk are sources of vitamins and minerals. Grandner et al. reported that sleep  
47  
48 283 symptoms such as difficulty falling asleep, difficulty maintaining sleep, non-restorative sleep,  
49  
50 284 and daytime sleepiness were associated with a lower intake of calcium, potassium, selenium,  
51  
52 285 vitamin C, vitamin D, alpha-carotene, and lycopene.<sup>28</sup> Although mechanistic links between  
53  
54

1  
2  
3  
4 286 vitamin intake and sleep quality are unclear, previous studies have verified the relationship  
5  
6 287 between sleep duration and vitamin intake.<sup>29,30</sup> In addition, Grandner et al. reported that  
7  
8 288 sleep symptoms associated with poor sleep quality were associated with a higher intake of  
9  
10 289 salt<sup>28</sup>, and fast food and instant noodle intake are associated with salt intake. In accordance  
11  
12 290 with the Korean food composition table, the sodium content of cooked hamburger is 498  
13  
14 291 mg/100 g, and that of cheese pizza is 447 mg/100 g. Instant noodle seasoning contains 2,225  
15  
16 292 mg of sodium in one portion (10.5 g).<sup>31</sup> Excessive salt (and therefore sodium) intake leads to  
17  
18 293 elevated blood pressure, whereas calcium and potassium lower blood pressure.<sup>32</sup> Fereidoun  
19  
20 294 et al. reported that providing 0.05 g/kg of salt to participants resulted in poor sleep quality.<sup>33</sup>  
21  
22 295 According to a study by Javaheri et al., poor sleep quality in adolescents was associated with  
23  
24 296 prehypertension.<sup>34</sup> The findings of previous studies and those of our study show that  
25  
26 297 consuming foods with high levels of salt and low levels of other micronutrients might result  
27  
28 298 in reduced sleep durations and poor sleep quality.  
29  
30  
31

32  
33 299 The limitations of our study are as follows. First, our study was based on data collected  
34  
35 300 by the KYRBWS, and as secondary data, it has some limitations in providing specific  
36  
37 301 information. For example, the dataset did not have information on nutrient contents or the  
38  
39 302 quantity of food consumed to go along with intake frequency data. In addition, data on other  
40  
41 303 confounding factors such as school examination periods or the timing of food intake across  
42  
43 304 the 24 h were not present. Second, because the data were collected based on a self-reported  
44  
45 305 questionnaire including weight and height, the precision of the information may be low such  
46  
47 306 as BMI have possibility of underestimation.<sup>35</sup> Third, the validity of questionnaires of sleep  
48  
49 307 duration, sleep quality and food intake frequencies is unclear. Hence, the responses on the  
50  
51 308 questionnaire may not represent the usual sleep duration, sleep quality or food intake  
52  
53  
54

1  
2  
3  
4 309 frequency of each participant. To collect usual sleep duration, sleep quality and food intake  
5  
6 310 data, the validity and reliability of the questionnaire should be evaluated in a further study.  
7  
8 311 Finally, because of the cross-sectional design, the causal relationship between sleep duration  
9  
10 312 and quality and food intake frequency is unclear. Longitudinal, randomized, controlled  
11  
12 313 studies should be conducted to determine the causal relationship.  
13  
14

15 314 Nevertheless, our findings provide valuable information for the following reasons. First,  
16  
17 315 our study was conducted on a representative population of Korean adolescents. Second, we  
18  
19 316 considered numerous socio-economic status variables as confounding factors to investigate  
20  
21 317 the independent relationship between sleep status and food consumption. Third, we  
22  
23 318 considered not only sleep duration but also sleep quality in explaining sleep status. Finally,  
24  
25 319 we investigated the intake frequency of various foods to show the relationship between sleep  
26  
27 320 status and food consumption.  
28  
29  
30

31 321

## 32 323

### 33 322 **CONCLUSION**

34  
35  
36 323 A short sleep duration was related to a higher frequency of soft drinks and confectionaries  
37  
38 324 intake. Additionally, poor sleep quality with a normal sleep duration was related to a lower  
39  
40 325 frequency of fruits, vegetables and milk intake, and a higher frequency of soda, soft drinks,  
41  
42 326 fast food, instant noodle and confectionaries intake in adolescents. Hence, we demonstrate  
43  
44 327 that short sleep durations and poor sleep quality might be associated with unhealthy food  
45  
46 328 consumption, such as consuming more sugar-sweetened beverages, fast food, instant noodle  
47  
48 329 and confectionaries, and fewer fruits, vegetables and milk. Further studies with a longitudinal,  
49  
50 330 randomized, controlled design are needed to elucidate the specific causal relationship  
51  
52 331 between sleep status and food consumption in adolescents.  
53  
54

1  
2  
3  
4 332

5  
6 333 **ACKNOWLEDGMENTS**

7  
8  
9 334 We thanks to the survey participants and examiners of the Division of Chronic Disease  
10  
11 335 Surveillance in the Korea Centers for Disease Control & Prevention for participating in this  
12  
13 336 survey and providing the data.  
14  
15

16 337

17  
18  
19 338 **DATA SHARING STATEMENT**

20  
21  
22 339 No additional data are available.  
23  
24

25 340

26  
27 341 **FUNDING STATEMENT**

28  
29  
30 342 This research was supported by Hallym University Research Fund.  
31  
32

33 343

34  
35 344 **COMPETING INTERESTS STATEMENT**

36  
37  
38 345 There are no competing interests for any author.  
39  
40

41 346

42  
43  
44 347 **CONTRIBUTORS**

45  
46  
47 348 CM wrote the manuscript. HJK designed the study. ISP performed the data processing. BP  
48  
49 349 performed the data interpretation. JHK analyzed the data. SS gave statistical techniques and  
50  
51 350 reviewed the manuscript. HGC conceptualized the study and wrote and reviewed the  
52  
53 351 manuscript.  
54

352 **REFERENCES**

- 353 1. National Sleep Foundation. Teens and Sleep. Available from:  
354 <https://sleepfoundation.org/sleep-topics/teens-and-sleep> accessed 8/29 2017.
- 355 2. Keyes KM, Maslowsky J, Hamilton A, et al. The great sleep recession: changes in sleep  
356 duration among US adolescents, 1991-2012. *Pediatrics* 2015;135(3):460-8. doi:  
357 10.1542/peds.2014-2707 [published Online First: 2015/02/18]
- 358 3. Cain N, Gradisar M. Electronic media use and sleep in school-aged children and  
359 adolescents: A review. *Sleep medicine* 2010;11(8):735-42. doi:  
360 10.1016/j.sleep.2010.02.006 [published Online First: 2010/08/03]
- 361 4. Ming X, Koransky R, Kang V, et al. Sleep insufficiency, sleep health problems and  
362 performance in high school students. *Clinical medicine insights Circulatory, respiratory  
363 and pulmonary medicine* 2011;5:71-9. doi: 10.4137/ccrpm.s7955 [published Online First:  
364 2011/11/16]
- 365 5. Meldrum RC, Restivo E. The behavioral and health consequences of sleep deprivation  
366 among U.S. high school students: relative deprivation matters. *Preventive medicine*  
367 2014;63:24-8. doi: 10.1016/j.ypmed.2014.03.006 [published Online First: 2014/03/19]
- 368 6. Smaldone A, Honig JC, Byrne MW. Sleepless in America: inadequate sleep and  
369 relationships to health and well-being of our nation's children. *Pediatrics* 2007;119 Suppl  
370 1:S29-37. doi: 10.1542/peds.2006-2089F [published Online First: 2007/02/03]
- 371 7. Wolfson AR, Carskadon MA. Understanding adolescents' sleep patterns and school  
372 performance: a critical appraisal. *Sleep medicine reviews* 2003;7(6):491-506. [published  
373 Online First: 2004/03/17]

- 1  
2  
3  
4 374 8. Fatima Y, Doi SA, Mamun AA. Longitudinal impact of sleep on overweight and obesity in  
5  
6 375 children and adolescents: a systematic review and bias-adjusted meta-analysis. *Obesity*  
7  
8 376 reviews : an official journal of the International Association for the Study of Obesity  
9  
10 377 2015;16(2):137-49. doi: 10.1111/obr.12245 [published Online First: 2015/01/16]  
11  
12  
13 378 9. World Health Organization. Obesity and overweight. Available from:  
14  
15 379 <http://www.who.int/mediacentre/factsheets/fs311/en/> accessed 3/7 2018.  
16  
17  
18 380 10. World Health Organization. What are the causes?: Reasons for children and adolescents to  
19  
20 381 become obese. Available from:  
21  
22 382 [http://www.who.int/dietphysicalactivity/childhood\\_why/en/](http://www.who.int/dietphysicalactivity/childhood_why/en/) accessed 8/31 2017.  
23  
24  
25 383 11. Bucher Della Torre S, Keller A, Laure Depeyre J, et al. Sugar-Sweetened Beverages and  
26  
27 384 Obesity Risk in Children and Adolescents: A Systematic Analysis on How  
28  
29 385 Methodological Quality May Influence Conclusions. *Journal of the Academy of*  
30  
31 386 *Nutrition and Dietetics* 2016;116(4):638-59. doi: 10.1016/j.jand.2015.05.020 [published  
32  
33 387 Online First: 2015/07/22]  
34  
35  
36 388 12. Schwingshackl L, Hobl LP, Hoffmann G. Effects of low glycaemic index/low glycaemic  
37  
38 389 load vs. high glycaemic index/ high glycaemic load diets on overweight/obesity and  
39  
40 390 associated risk factors in children and adolescents: a systematic review and meta-analysis.  
41  
42 391 *Nutrition journal* 2015;14:87. doi: 10.1186/s12937-015-0077-1 [published Online First:  
43  
44 392 2015/10/23]  
45  
46  
47  
48 393 13. Ferranti R, Marventano S, Castellano S, et al. Sleep quality and duration is related with  
49  
50 394 diet and obesity in young adolescent living in Sicily, Southern Italy. *Sleep science (Sao*  
51  
52 395 *Paulo, Brazil)* 2016;9(2):117-22. doi: 10.1016/j.slsci.2016.04.003 [published Online First:  
53  
54



- 1  
2  
3  
4 396 2016/09/23]
- 5  
6  
7 397 14. Gong QH, Li H, Zhang XH, et al. Associations between sleep duration and physical  
8  
9 398 activity and dietary behaviors in Chinese adolescents: results from the Youth Behavioral  
10  
11 399 Risk Factor Surveys of 2015. *Sleep medicine* 2017;37:168-73. doi:  
12  
13 400 10.1016/j.sleep.2017.06.024 [published Online First: 2017/09/14]
- 14  
15  
16 401 15. Kruger AK, Reither EN, Peppard PE, et al. Do sleep-deprived adolescents make less-  
17  
18 402 healthy food choices? *The British journal of nutrition* 2014;111(10):1898-904. doi:  
19  
20 403 10.1017/s0007114514000130 [published Online First: 2014/02/15]
- 21  
22  
23 404 16. Gonnissen HK, Hursel R, Rutters F, et al. Effects of sleep fragmentation on appetite and  
24  
25 405 related hormone concentrations over 24 h in healthy men. *The British journal of nutrition*  
26  
27 406 2013;109(4):748-56. doi: 10.1017/s0007114512001894 [published Online First:  
28  
29 407 2012/06/12]
- 30  
31  
32 408 17. Taheri S, Lin L, Austin D, et al. Short sleep duration is associated with reduced leptin,  
33  
34 409 elevated ghrelin, and increased body mass index. *PLoS medicine* 2004;1(3):e62. doi:  
35  
36 410 10.1371/journal.pmed.0010062 [published Online First: 2004/12/17]
- 37  
38  
39 411 18. Korea National Health and Nutrition Examination Survey. *Korea Health Statistics* 2016:  
40  
41 412 Korea National Health and Nutrition Examination Survey (KNHANES VII-1), 2018.
- 42  
43  
44  
45 413 19. Lee J. Sleep duration's association with diet, physical activity, mental status, and weight  
46  
47 414 among Korean high school students. *Asia Pacific journal of clinical nutrition*  
48  
49 415 2017;26(5):906-13. doi: 10.6133/apjcn.082016.04 [published Online First: 2017/08/15]
- 50  
51  
52 416 20. Centers for Disease Control and Prevention. About BMI for Children and Teens.
- 53  
54

- 1  
2  
3  
4 417 Available from:  
5  
6 418 [http://www.cdc.gov/healthyweight/assessing/bmi/childrens\\_bmi/about\\_childrens\\_bmi.ht](http://www.cdc.gov/healthyweight/assessing/bmi/childrens_bmi/about_childrens_bmi.html)  
7  
8 419 [ml](http://www.cdc.gov/healthyweight/assessing/bmi/childrens_bmi/about_childrens_bmi.html) accessed 11/14 2014.  
9  
10  
11 420 21. Baron KG, Reid KJ, Kern AS, et al. Role of sleep timing in caloric intake and BMI.  
12  
13 421 Obesity (Silver Spring, Md) 2011;19(7):1374-81. doi: 10.1038/oby.2011.100 [published  
14  
15 422 Online First: 2011/04/30]  
16  
17  
18 423 22. Rudnicka AR, Nightingale CM, Donin AS, et al. Sleep Duration and Risk of Type 2  
19  
20 424 Diabetes. Pediatrics 2017;140(3) doi: 10.1542/peds.2017-0338 [published Online First:  
21  
22 425 2017/08/16]  
23  
24  
25 426 23. Doo M, Kim Y. The Consumption of Dietary Antioxidant Vitamins Modifies the Risk of  
26  
27 427 Obesity among Korean Men with Short Sleep Duration. Nutrients 2017;9(7) doi:  
28  
29 428 10.3390/nu9070780 [published Online First: 2017/07/21]  
30  
31  
32 429 24. Hu FB, Malik VS. Sugar-sweetened beverages and risk of obesity and type 2 diabetes:  
33  
34 430 epidemiologic evidence. Physiology & behavior 2010;100(1):47-54. doi:  
35  
36 431 10.1016/j.physbeh.2010.01.036 [published Online First: 2010/02/09]  
37  
38  
39 432 25. Prentice AM, Jebb SA. Fast foods, energy density and obesity: a possible mechanistic link.  
40  
41 433 Obesity reviews : an official journal of the International Association for the Study of  
42  
43 434 Obesity 2003;4(4):187-94. [published Online First: 2003/12/03]  
44  
45  
46 435 26. Edelstein SL, Knowler WC, Bain RP, et al. Predictors of progression from impaired  
47  
48 436 glucose tolerance to NIDDM: an analysis of six prospective studies. Diabetes  
49  
50 437 1997;46(4):701-10. [published Online First: 1997/04/01]  
51  
52  
53 438 27. Pereira MA, Kartashov AI, Ebbeling CB, et al. Fast-food habits, weight gain, and insulin

- 1  
2  
3  
4 439 resistance (the CARDIA study): 15-year prospective analysis. *Lancet* (London, England)  
5  
6 440 2005;365(9453):36-42. doi: 10.1016/s0140-6736(04)17663-0 [published Online First:  
7  
8 441 2005/01/11]  
9  
10  
11 442 28. Grandner MA, Jackson N, Gerstner JR, et al. Sleep symptoms associated with intake of  
12  
13 443 specific dietary nutrients. *Journal of sleep research* 2014;23(1):22-34. doi:  
14  
15 444 10.1111/jsr.12084 [published Online First: 2013/09/03]  
16  
17  
18 445 29. Majid MS, Ahmad HS, Bizhan H, et al. The effect of vitamin D supplement on the score  
19  
20 446 and quality of sleep in 20-50 year-old people with sleep disorders compared with control  
21  
22 447 group. *Nutritional neuroscience* 2017:1-9. doi: 10.1080/1028415x.2017.1317395  
23  
24 448 [published Online First: 2017/05/06]  
25  
26  
27 449 30. Peuhkuri K, Sihvola N, Korpela R. Diet promotes sleep duration and quality. *Nutrition*  
28  
29 450 research (New York, NY) 2012;32(5):309-19. doi: 10.1016/j.nutres.2012.03.009  
30  
31 451 [published Online First: 2012/06/02]  
32  
33  
34 452 31. Department of Agrofood Resources, NAAS, RDA, et al. 8th revision Standard Food  
35  
36 453 Composition Table, 2013.  
37  
38  
39 454 32. Karppanen H, Mervaala E. Sodium intake and hypertension. *Progress in cardiovascular*  
40  
41 455 *diseases* 2006;49(2):59-75. doi: 10.1016/j.pcad.2006.07.001 [published Online First:  
42  
43 456 2006/10/19]  
44  
45  
46 457 33. Fereidoun H, Pouria H. Effect of excessive salt consumption on night's sleep. *Pak J*  
47  
48 458 *physiol* 2014;10(3-4):6-9.  
49  
50  
51 459 34. Javaheri S, Storfer-Isser A, Rosen CL, et al. Sleep quality and elevated blood pressure in  
52  
53 460 adolescents. *Circulation* 2008;118(10):1034-40. doi: 10.1161/circulationaha.108.766410

1  
2  
3  
4 461 [published Online First: 2008/08/20]  
5

6 462 35. Bae J, Joung H, Kim JY, et al. Validity of self-reported height, weight, and body mass  
7  
8 463 index of the Korea Youth Risk Behavior Web-based Survey questionnaire. Journal of  
9  
10 464 preventive medicine and public health = Yebang Uihakhoe chi 2010;43(5):396-402. doi:  
11  
12 10.3961/jpmph.2010.43.5.396 [published Online First: 2010/10/21]  
13  
14  
15  
16  
17  
18  
19  
20  
21  
22  
23  
24  
25  
26  
27  
28  
29  
30  
31  
32  
33  
34  
35  
36  
37  
38  
39  
40  
41  
42  
43  
44  
45  
46  
47  
48  
49  
50  
51  
52  
53  
54

1  
2  
3  
4 466 **FIGURE**

5  
6 467 **Figure 1. A schematic illustration of the participant selection.** From a total of 140,103  
7  
8 468 participants, those getting < 3 h or > 12 h of sleep per night or with no sleep records (n =  
9  
10 469 18,594), without a record of their age (403) or without height or weight data (2,644) were  
11  
12 470 excluded. The data for the 118,462 participants from whom complete records were obtained  
13  
14 471 were analyzed.  
15  
16  
17  
18 472

19  
20  
21 473 **SUPPLEMENTARY FILES**

22  
23 474 **S1 Table. Quality of sleep rates of participants according to sleep duration.** \* Chi-square  
24  
25 475 test with Rao-Scott correction, Significance at  $P < 0.05$   
26  
27

28 476 **S2 Table. Unadjusted odd ratios of sleep duration for food consumption using multiple**  
29  
30 477 **logistic regression analysis with complex sampling (Reference of food frequency = 0 time**  
31  
32 478 **a week).** \* Significance at  $P < 0.05$   
33  
34

35  
36 479  
37

38 480  
39

40 481  
41

42 482  
43

44 483  
45  
46  
47  
48  
49  
50  
51  
52  
53  
54

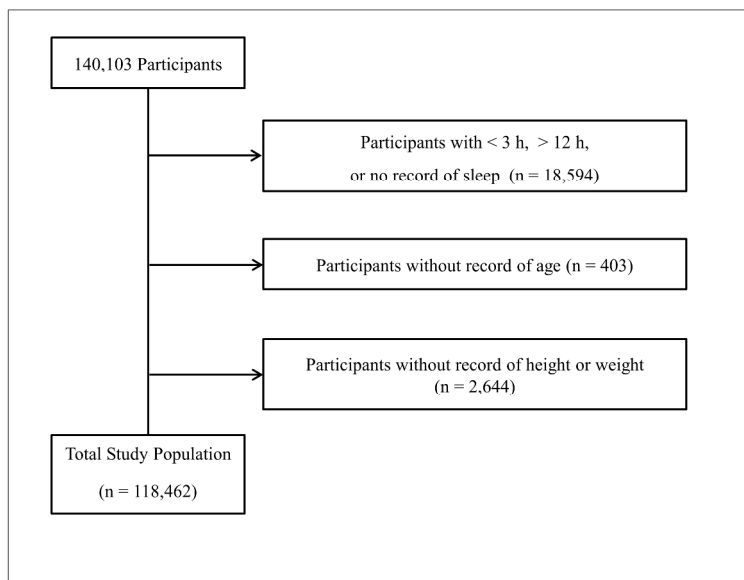

**Figure 1. A schematic illustration of the participant selection.**

Among a total of 140,103 participants, the participants Participants with < 3 h, > 12 h, or no record of sleep (n = 18,594) or without record of age (403) and height or weight records (2,644) were excluded. The data for the 118,462 participants from whom complete data were obtained were analyzed.

254x190mm (300 x 300 DPI)

**S1 Table. Quality of sleep rates of participants according to sleep duration.**

| Factors              | Total | Sleep time |      |      |      |      | P-value |
|----------------------|-------|------------|------|------|------|------|---------|
|                      |       | 6(-) h     | 6 h  | 7 h  | 8 h  | 9+ h |         |
| Quality of sleep (%) |       |            |      |      |      |      | <0.001* |
| Good                 | 26.6  | 10.1       | 17.9 | 29.8 | 45.4 | 48.3 |         |
| Moderate             | 32.9  | 25.7       | 35.0 | 37.8 | 33.9 | 29.9 |         |
| Poor                 | 40.5  | 64.2       | 47.0 | 32.4 | 20.7 | 21.8 |         |

\* Chi-square test with Rao-Scott correction, Significance at  $P < 0.05$

**S2 Table. Unadjusted odd ratios of sleep duration for food consumption using multiple logistic regression analysis with complex sampling (Reference of food frequency = 0 time a week).**

| Factors          | AOR (95% Confidence interval) of Sleep time |                  |                  |                  |      | P-value |
|------------------|---------------------------------------------|------------------|------------------|------------------|------|---------|
|                  | 6(-) h                                      | 6 h              | 7 h              | 8 h              | 9+ h |         |
| Fruits (%)       |                                             |                  |                  |                  |      | <0.001* |
| ≥5 times a week  | 0.95 (0.87-1.04)                            | 0.89 (0.82-0.97) | 0.92 (0.84-1.00) | 1.06 (0.97-1.16) | 1    |         |
| 3-6 times a week | 1.06 (0.97-1.16)                            | 1.09 (0.99-1.19) | 1.07 (0.98-1.18) | 1.15 (1.04-1.26) | 1    |         |
| 1-2 times a week | 1.13 (1.03-1.24)                            | 1.14 (1.05-1.25) | 1.11 (1.01-1.21) | 1.04 (0.95-1.14) | 1    |         |
| Soda (%)         |                                             |                  |                  |                  |      | <0.001* |
| ≥5 times a week  | 1.07 (0.96-1.20)                            | 1.12 (1.02-1.24) | 1.14 (1.04-1.26) | 1.01 (0.92-1.12) | 1    |         |
| 3-6 times a week | 1.02 (0.94-1.10)                            | 1.20 (1.12-1.29) | 1.25 (1.17-1.33) | 1.10 (1.02-1.18) | 1    |         |
| 1-2 times a week | 1.02 (0.96-1.08)                            | 1.14 (1.08-1.21) | 1.21 (1.14-1.28) | 1.08 (1.02-1.15) | 1    |         |
| Soft drinks (%)  |                                             |                  |                  |                  |      | <0.001* |
| ≥5 times a week  | 1.90 (1.73-2.09)                            | 1.66 (1.52-1.81) | 1.39 (1.28-1.52) | 1.14 (1.04-1.25) | 1    |         |
| 3-6 times a week | 1.52 (1.41-1.64)                            | 1.49 (1.39-1.60) | 1.35 (1.25-1.45) | 1.15 (1.07-1.24) | 1    |         |



|                     |                  |                  |                  |                  |   |         |
|---------------------|------------------|------------------|------------------|------------------|---|---------|
| 1-2 times a week    | 1.28 (1.20-1.36) | 1.32 (1.25-1.41) | 1.24 (1.17-1.32) | 1.15 (1.08-1.23) | 1 |         |
| Fast food (%)       |                  |                  |                  |                  |   | <0.001* |
| ≥5 times a week     | 1.26 (.09-1.46)  | 1.21 (1.05-1.39) | 0.94 (0.81-1.09) | 0.81 (0.70-0.94) | 1 |         |
| 3-6 times a week    | 1.45 (1.33-1.58) | 1.51 (1.39-1.64) | 1.29 (1.19-1.40) | 1.06 (0.98-1.16) | 1 |         |
| 1-2 times a week    | 1.33 (1.26-1.41) | 1.38 (1.31-1.46) | 1.30 (1.23-1.37) | 1.13 (1.07-1.19) | 1 |         |
| Instant noodle (%)  |                  |                  |                  |                  |   | <0.001* |
| ≥5 times a week     | 0.66 (0.59-0.75) | 0.71 (0.63-0.80) | 0.87 (0.78-0.97) | 0.93 (0.83-1.05) | 1 |         |
| 3-6 times a week    | 0.67 (0.62-0.73) | 0.85 (0.79-0.91) | 1.03 (0.95-1.10) | 1.15 (1.07-1.24) | 1 |         |
| 1-2 times a week    | 0.79 (0.75-0.84) | 0.95 (0.89-1.00) | 1.05 (0.99-1.11) | 1.11 (1.05-1.18) | 1 |         |
| Confectionaries (%) |                  |                  |                  |                  |   | <0.001* |
| ≥5 times a week     | 1.53 (1.39-1.67) | 1.40 (1.28-1.53) | 1.14 (1.04-1.24) | 1.07 (0.97-1.17) | 1 |         |
| 3-6 times a week    | 1.39 (1.29-1.49) | 1.36 (1.27-1.46) | 1.24 (1.16-1.32) | 1.13 (1.05-1.21) | 1 |         |
| 1-2 times a week    | 1.23 (1.15-1.31) | 1.26 (1.18-1.35) | 1.17 (1.10-1.25) | 1.10 (1.03-1.18) | 1 |         |
| Vegetables (%)      |                  |                  |                  |                  |   | <0.001* |
| ≥5 times a week     | 0.94 (0.84-1.06) | 0.96 (0.85-1.08) | 1.07 (0.95-1.20) | 1.11 (0.98-1.26) | 1 |         |
| 3-6 times a week    | 1.00 (0.89-1.13) | 1.10 (0.97-1.24) | 1.25 (1.11-1.41) | 1.14 (1.00-1.31) | 1 |         |

|                  |                  |                  |                  |                  |         |
|------------------|------------------|------------------|------------------|------------------|---------|
| 1-2 times a week | 0.98 (0.87-1.11) | 1.12 (0.99-1.28) | 1.25 (1.10-1.43) | 1.19 (1.04-1.37) | 1       |
| Milk (%)         |                  |                  |                  |                  | <0.001* |
| ≥5 times a week  | 0.51 (0.47-0.55) | 0.57 (0.53-0.62) | 0.73 (0.68-0.79) | 0.97 (0.90-1.04) | 1       |
| 3-6 times a week | 0.79 (0.73-0.86) | 0.86 (0.79-0.93) | 1.00 (0.92-1.08) | 1.11 (1.02-1.21) | 1       |
| 1-2 times a week | 0.91 (0.84-0.98) | 0.98 (0.91-1.06) | 1.03 (0.96-1.12) | 1.05 (0.96-1.14) | 1       |

\* Significance at P < 0.05

# Reporting checklist for cross sectional study.

Based on the STROBE cross sectional guidelines.

## Instructions to authors

Complete this checklist by entering the page numbers from your manuscript where readers will find each of the items listed below.

Your article may not currently address all the items on the checklist. Please modify your text to include the missing information. If you are certain that an item does not apply, please write "n/a" and provide a short explanation.

Upload your completed checklist as an extra file when you submit to a journal.

In your methods section, say that you used the STROBE cross sectional reporting guidelines, and cite them as:

von Elm E, Altman DG, Egger M, Pocock SJ, Gotsche PC, Vandembroucke JP. The Strengthening the Reporting of Observational Studies in Epidemiology (STROBE) Statement: guidelines for reporting observational studies.

|                        |     | Reporting Item                                                                                                                  | Page Number |
|------------------------|-----|---------------------------------------------------------------------------------------------------------------------------------|-------------|
| Title                  | #1a | Indicate the study's design with a commonly used term in the title or the abstract                                              | 1           |
| Abstract               | #1b | Provide in the abstract an informative and balanced summary of what was done and what was found                                 | 3-4         |
| Background / rationale | #2  | Explain the scientific background and rationale for the investigation being reported                                            | 6-7         |
| Objectives             | #3  | State specific objectives, including any prespecified hypotheses                                                                | 7           |
| Study design           | #4  | Present key elements of study design early in the paper                                                                         | 8           |
| Setting                | #5  | Describe the setting, locations, and relevant dates, including periods of recruitment, exposure, follow-up, and data collection | 8           |
| Eligibility criteria   | #6a | Give the eligibility criteria, and the sources and methods of selection of participants.                                        | 8           |

|    |                  |      |                                                                   |       |
|----|------------------|------|-------------------------------------------------------------------|-------|
| 1  |                  | #7   | Clearly define all outcomes, exposures, predictors, potential     | 8-10  |
| 2  |                  |      | confounders, and effect modifiers. Give diagnostic criteria, if   |       |
| 3  |                  |      | applicable                                                        |       |
| 4  |                  |      |                                                                   |       |
| 5  |                  |      |                                                                   |       |
| 6  | Data sources /   | #8   | For each variable of interest give sources of data and details of | 8-10  |
| 7  | measurement      |      | methods of assessment (measurement). Describe                     |       |
| 8  |                  |      | comparability of assessment methods if there is more than one     |       |
| 9  |                  |      | group. Give information separately for for exposed and            |       |
| 10 |                  |      | unexposed groups if applicable.                                   |       |
| 11 |                  |      |                                                                   |       |
| 12 |                  |      |                                                                   |       |
| 13 |                  |      |                                                                   |       |
| 14 | Bias             | #9   | Describe any efforts to address potential sources of bias         | 9-10  |
| 15 |                  |      |                                                                   |       |
| 16 |                  |      |                                                                   |       |
| 17 | Study size       | #10  | Explain how the study size was arrived at                         | 8     |
| 18 |                  |      |                                                                   |       |
| 19 | Quantitative     | #11  | Explain how quantitative variables were handled in the            | 8     |
| 20 | variables        |      | analyses. If applicable, describe which groupings were chosen,    |       |
| 21 |                  |      | and why                                                           |       |
| 22 |                  |      |                                                                   |       |
| 23 |                  |      |                                                                   |       |
| 24 | Statistical      | #12a | Describe all statistical methods, including those used to control | 10-11 |
| 25 | methods          |      | for confounding                                                   |       |
| 26 |                  |      |                                                                   |       |
| 27 |                  |      |                                                                   |       |
| 28 |                  | #12b | Describe any methods used to examine subgroups and                | 8-10  |
| 29 |                  |      | interactions                                                      |       |
| 30 |                  |      |                                                                   |       |
| 31 |                  |      |                                                                   |       |
| 32 |                  | #12c | Explain how missing data were addressed                           | 8     |
| 33 |                  |      |                                                                   |       |
| 34 |                  |      |                                                                   |       |
| 35 |                  | #12d | If applicable, describe analytical methods taking account of      | 8     |
| 36 |                  |      | sampling strategy                                                 |       |
| 37 |                  |      |                                                                   |       |
| 38 |                  |      |                                                                   |       |
| 39 |                  | #12e | Describe any sensitivity analyses                                 | 10-11 |
| 40 |                  |      |                                                                   |       |
| 41 | Participants     | #13a | Report numbers of individuals at each stage of study—eg           | 11-12 |
| 42 |                  |      | numbers potentially eligible, examined for eligibility, confirmed |       |
| 43 |                  |      | eligible, included in the study, completing follow-up, and        |       |
| 44 |                  |      | analysed. Give information separately for for exposed and         |       |
| 45 |                  |      | unexposed groups if applicable.                                   |       |
| 46 |                  |      |                                                                   |       |
| 47 |                  |      |                                                                   |       |
| 48 |                  |      |                                                                   |       |
| 49 |                  | #13b | Give reasons for non-participation at each stage                  | 8     |
| 50 |                  |      |                                                                   |       |
| 51 |                  |      |                                                                   |       |
| 52 |                  | #13c | Consider use of a flow diagram                                    | 8     |
| 53 |                  |      |                                                                   |       |
| 54 | Descriptive data | #14a | Give characteristics of study participants (eg demographic,       | 11-15 |
| 55 |                  |      | clinical, social) and information on exposures and potential      |       |
| 56 |                  |      | confounders. Give information separately for exposed and          |       |
| 57 |                  |      | unexposed groups if applicable.                                   |       |
| 58 |                  |      |                                                                   |       |
| 59 |                  |      |                                                                   |       |
| 60 |                  |      |                                                                   |       |

|    |                  |      |                                                                      |       |
|----|------------------|------|----------------------------------------------------------------------|-------|
| 1  |                  | #14b | Indicate number of participants with missing data for each           | 11-15 |
| 2  |                  |      | variable of interest                                                 |       |
| 3  |                  |      |                                                                      |       |
| 4  |                  |      |                                                                      |       |
| 5  | Outcome data     | #15  | Report numbers of outcome events or summary measures.                | 11-13 |
| 6  |                  |      | Give information separately for exposed and unexposed                |       |
| 7  |                  |      | groups if applicable.                                                |       |
| 8  |                  |      |                                                                      |       |
| 9  |                  |      |                                                                      |       |
| 10 | Main results     | #16a | Give unadjusted estimates and, if applicable, confounder-            | 20-22 |
| 11 |                  |      | adjusted estimates and their precision (eg, 95% confidence           |       |
| 12 |                  |      | interval). Make clear which confounders were adjusted for and        |       |
| 13 |                  |      | why they were included                                               |       |
| 14 |                  |      |                                                                      |       |
| 15 |                  |      |                                                                      |       |
| 16 |                  |      |                                                                      |       |
| 17 |                  | #16b | Report category boundaries when continuous variables were            | 20-22 |
| 18 |                  |      | categorized                                                          |       |
| 19 |                  |      |                                                                      |       |
| 20 |                  |      |                                                                      |       |
| 21 |                  | #16c | If relevant, consider translating estimates of relative risk into    | 20-22 |
| 22 |                  |      | absolute risk for a meaningful time period                           |       |
| 23 |                  |      |                                                                      |       |
| 24 | Other analyses   | #17  | Report other analyses done—e.g., analyses of subgroups and           | 16-19 |
| 25 |                  |      | interactions, and sensitivity analyses                               |       |
| 26 |                  |      |                                                                      |       |
| 27 |                  |      |                                                                      |       |
| 28 | Key results      | #18  | Summarise key results with reference to study objectives             | 22    |
| 29 |                  |      |                                                                      |       |
| 30 |                  |      |                                                                      |       |
| 31 | Limitations      | #19  | Discuss limitations of the study, taking into account sources of     | 24-25 |
| 32 |                  |      | potential bias or imprecision. Discuss both direction and            |       |
| 33 |                  |      | magnitude of any potential bias.                                     |       |
| 34 |                  |      |                                                                      |       |
| 35 |                  |      |                                                                      |       |
| 36 | Interpretation   | #20  | Give a cautious overall interpretation considering objectives,       | 22-24 |
| 37 |                  |      | limitations, multiplicity of analyses, results from similar studies, |       |
| 38 |                  |      | and other relevant evidence.                                         |       |
| 39 |                  |      |                                                                      |       |
| 40 |                  |      |                                                                      |       |
| 41 | Generalisability | #21  | Discuss the generalisability (external validity) of the study        | 25    |
| 42 |                  |      | results                                                              |       |
| 43 |                  |      |                                                                      |       |
| 44 |                  |      |                                                                      |       |
| 45 | Funding          | #22  | Give the source of funding and the role of the funders for the       | 26    |
| 46 |                  |      | present study and, if applicable, for the original study on which    |       |
| 47 |                  |      | the present article is based                                         |       |
| 48 |                  |      |                                                                      |       |
| 49 |                  |      |                                                                      |       |

The STROBE checklist is distributed under the terms of the Creative Commons Attribution License CC-BY. This checklist was completed on 09. March 2018 using <http://www.goodreports.org/>, a tool made by the [EQUATOR Network](#) in collaboration with [Penelope.ai](#)

# BMJ Open

## The association between sleep duration, quality and food consumption in adolescent: A cross-sectional study using the Korea Youth Risk Behavior Web-based Survey

|                                 |                                                                                                                                                                                                                                                                                                                                                                                                                                                                                                                                                                                                                                                                                                                                                                                                                               |
|---------------------------------|-------------------------------------------------------------------------------------------------------------------------------------------------------------------------------------------------------------------------------------------------------------------------------------------------------------------------------------------------------------------------------------------------------------------------------------------------------------------------------------------------------------------------------------------------------------------------------------------------------------------------------------------------------------------------------------------------------------------------------------------------------------------------------------------------------------------------------|
| Journal:                        | <i>BMJ Open</i>                                                                                                                                                                                                                                                                                                                                                                                                                                                                                                                                                                                                                                                                                                                                                                                                               |
| Manuscript ID                   | bmjopen-2018-022848.R2                                                                                                                                                                                                                                                                                                                                                                                                                                                                                                                                                                                                                                                                                                                                                                                                        |
| Article Type:                   | Research                                                                                                                                                                                                                                                                                                                                                                                                                                                                                                                                                                                                                                                                                                                                                                                                                      |
| Date Submitted by the Author:   | 08-Jun-2018                                                                                                                                                                                                                                                                                                                                                                                                                                                                                                                                                                                                                                                                                                                                                                                                                   |
| Complete List of Authors:       | Min, Chanyang; Hallym Data Science Laboratory, Hallym University College of Medicine; Graduate School of Public Health, Seoul National University<br>Kim, Hyung-Jong; Department of Otorhinolaryngology-Head & Neck Surgery, Hallym University College of Medicine<br>Park, Il-Seok; Department of Otorhinolaryngology-Head & Neck Surgery, Hallym University College of Medicine<br>Park, Bumjung; Department of Otorhinolaryngology-Head & Neck Surgery<br>Kim, Jin-Hwan; Department of Otorhinolaryngology-Head & Neck Surgery, Hallym University College of Medicine<br>Sim, Songyong; Department of statistics, Hallym University<br>Choi, Hyo Geun; Hallym Data Science Laboratory, Hallym University College of Medicine; Department of Otorhinolaryngology-Head & Neck Surgery, Hallym University College of Medicine |
| <b>Primary Subject Heading</b>: | Public health                                                                                                                                                                                                                                                                                                                                                                                                                                                                                                                                                                                                                                                                                                                                                                                                                 |
| Secondary Subject Heading:      | Nutrition and metabolism, Epidemiology                                                                                                                                                                                                                                                                                                                                                                                                                                                                                                                                                                                                                                                                                                                                                                                        |
| Keywords:                       | NUTRITION & DIETETICS, PUBLIC HEALTH, PREVENTIVE MEDICINE                                                                                                                                                                                                                                                                                                                                                                                                                                                                                                                                                                                                                                                                                                                                                                     |
|                                 |                                                                                                                                                                                                                                                                                                                                                                                                                                                                                                                                                                                                                                                                                                                                                                                                                               |

SCHOLARONE™  
Manuscripts

1  
2  
3  
4 1 **The association between sleep duration, quality and food**  
5  
6  
7 2 **consumption in adolescent: A cross-sectional study using**  
8  
9  
10 3 **the Korea Youth Risk Behavior Web-based Survey**  
11  
12  
13  
14 4

15 5 Chanyang Min<sup>1,2</sup>, Hyung-Jong Kim<sup>3</sup>, Il-Seok Park<sup>4</sup>, Bumjung Park<sup>3</sup>, Jin-Hwan Kim<sup>5</sup>,  
16  
17 6 Songyong Sim<sup>6\*</sup>, Hyo Geun Choi<sup>1,3\*</sup>  
18  
19

20 7  
21  
22 8 <sup>1</sup>Hallym Data Science Laboratory, Hallym University College of Medicine, Anyang, Korea  
23  
24

25 9 <sup>2</sup>Graduate School of Public Health, Seoul National University, Seoul, Korea  
26  
27

28 10 <sup>3</sup>Department of Otorhinolaryngology-Head & Neck Surgery, Hallym University College of  
29  
30 11 Medicine, Anyang, Korea  
31

32 12 <sup>4</sup>Department of Otorhinolaryngology-Head & Neck Surgery, Hallym University College of  
33  
34 13 Medicine, Dongtan, Korea  
35  
36

37 14 <sup>5</sup>Department of Otorhinolaryngology-Head & Neck Surgery, Hallym University College of  
38  
39 15 Medicine, Seoul, Korea  
40  
41

42 16 <sup>6</sup>Department of statistics, Hallym University, Chuncheon, Korea.  
43  
44

45 17  
46  
47  
48 18 Word count: 3,129  
49  
50

51 19  
52  
53 20 \* Corresponding author  
54

1  
2  
3  
4 21 Name: Hyo Geun Choi

5  
6 22 Department of Otorhinolaryngology-Head & Neck Surgery, Hallym University Sacred Heart

7  
8 23 Hospital, 22, Gwanpyeong-ro 170beon-gil, Dongan-gu, Anyang-si, Gyeonggi-do, 14068

9  
10 24 Republic of Korea

11  
12 25 Tel: 82-31-380-3849

13  
14 26 Fax: 82-31-386-3860

15  
16 27 Email: pupen@naver.com

17  
18  
19 28

20  
21 29 \*Songyong Sim and Hyo Geun Choi are equally contributed in this study

22  
23  
24 30  
25  
26  
27  
28  
29  
30  
31  
32  
33  
34  
35  
36  
37  
38  
39  
40  
41  
42  
43  
44  
45  
46  
47  
48  
49  
50  
51  
52  
53  
54  
55  
56  
57  
58  
59  
60



1  
2  
3  
4 31 **ABSTRACT**

5  
6 32 Objective: This study examined the relationship between sleep duration and quality and food  
7  
8 33 consumption among adolescents.

9  
10  
11 34 Design: Cross-sectional study.

12  
13  
14 35 Setting: Data from the 2014 and 2015 Korea Youth Risk Behavior Web-based Survey were  
15  
16 36 used.

17  
18  
19 37 Participants: Participants of 12-18 years old (n = 118,462 [59,431 males, 59,031 females])  
20  
21 38 were selected.

22  
23  
24 39 Primary and secondary outcome measures: Sleep duration, sleep quality and the frequencies  
25  
26 40 of fruits, soda, soft drinks, fast food, instant noodle, confectionaries, vegetables, and milk  
27  
28 41 consumption.

29  
30  
31 42 Results: Short sleep durations (< 6 h) were associated with higher soft drinks and  
32  
33 43 confectionaries intake than longer sleep durations (9+ h) (adjusted odds ratios, AORs [95%  
34  
35 44 confidence intervals, CIs] for  $\geq 5$  times a week for soft drinks, 1.73 [1.57-1.91] and  
36  
37 45 confectionaries, 1.32 [1.20-1.46];  $P < 0.001$ ). Poor sleep quality, with 7-8 h of sleep, was  
38  
39 46 associated with a lower intake of fruits, vegetables and milk (AORs [95% CIs] for  $\geq 5$  times a  
40  
41 47 week for fruits, 0.71 [0.65-0.77]; vegetables, 0.66 [0.58-0.75]; and milk, 0.80 [0.74-0.86];  
42  
43 48 each  $P < 0.001$ ), and higher intake of soda, soft drinks, fast food, instant noodle and  
44  
45 49 confectionaries (AORs [95% CIs] for  $\geq 5$  times a week for soda, 1.55 [1.40-1.70]; soft drinks,  
46  
47 50 1.58 [1.43-1.73]; fast food, 1.97 [1.65-2.35]; instant noodle, 1.55 [1.37-1.76]; and  
48  
49 51 confectionaries, 1.30 [1.18-1.43]; each  $P < 0.001$ ) than good sleep quality of the same  
50  
51 52 duration.  
52  
53  
54

1  
2  
3  
4 53 Conclusion: Short sleep durations and poor sleep quality might be associated with higher  
5  
6 54 consumption of unhealthier foods, such as sugar-sweetened beverages, fast food, instant  
7  
8 55 noodle and confectionaries, and associated with lower consumption of fruits, vegetables and  
9  
10 56 milk.

11  
12  
13 57 Key words: sleep duration, sleep quality, food consumption, food frequency, sugar-sweetened  
14  
15 58 beverages, fast food, fruits, vegetables, adolescents, Korean

16  
17  
18 59  
19  
20  
21 60

1  
2  
3  
4 61 **STRENGTHS AND LIMITATIONS OF THIS STUDY**

- 5  
6 62 ♦ Our study was conducted on a representative population of Korean adolescents.  
7  
8  
9 63 ♦ We considered numerous socio-economic status variables as confounding factors to  
10  
11 64 investigate the independent relationship between sleep status and food consumption.  
12  
13  
14 65 ♦ We considered not only sleep duration but also sleep quality in explaining sleep  
15  
16 66 status.  
17  
18  
19 67 ♦ Our study was based on secondary data and it has some limitations in providing  
20  
21 68 specific information.  
22  
23  
24 69 ♦ Because the data were collected based on a self-reported questionnaire, the precision  
25  
26 70 of the information may be low.  
27  
28

29 71  
30  
31  
32  
33  
34  
35  
36  
37  
38  
39  
40  
41  
42  
43  
44  
45  
46  
47  
48  
49  
50  
51  
52  
53  
54  
55  
56  
57  
58  
59  
60

## 72 INTRODUCTION

73 Sufficient sleep in adolescents is important to maintain good health status and school  
74 performance. According to the National Sleep Foundation <sup>1</sup>, approximately 8 to 10 hours of  
75 sleep a night is best for adolescents. However, sleep durations for adolescents have been  
76 declining. <sup>2</sup> The reasons for decreasing sleep durations and reduced sleep quality among  
77 adolescents have been suggested to be associated with increased use of the internet and social  
78 media, and earlier school start times. <sup>3 4</sup> Inadequate sleep durations or quality could lead to  
79 poor school performance, physical health problems such as atopic conditions, headaches,  
80 mental health problems, and unhealthy behaviors. <sup>4-7</sup>

81 One of the outcomes of sleep deprivation among adolescents is obesity <sup>8</sup>, which has  
82 become a serious public health problem worldwide. <sup>9</sup> The fundamental factor leading to  
83 obesity is an energy imbalance between the calories consumed and the calories expended <sup>10</sup>;  
84 therefore, dietary factors are closely related to the prevalence of obesity <sup>11 12</sup> and are  
85 considered as a potential link between sleep deprivation and obesity in adolescents.  
86 According to previous studies, the intake of fruits, vegetables and milk have a positive  
87 association, and the intake of sweets, snacks and fast food a negative association with sleep  
88 duration. <sup>13-15</sup> In short, adolescents who get less sleep may be more likely to consume more  
89 calories in the form of fast foods, sweets and snacks, and fewer micronutrients than  
90 adolescents who get more sleep. Previous studies demonstrated that one of the possible  
91 reasons for sleep deprivation in association with the consumption of higher energy foods  
92 might be changes in hormones such as decreased leptin and increased ghrelin levels, which  
93 can lead to an increase in appetite. <sup>16 17</sup> In summary, sleep deprivation in adolescents might  
94 affect dietary habits as a factor of health problems including obesity.

1  
2  
3  
4 95 In Korea, the prevalence of childhood obesity in males and females was 15.3% and 11.1%  
5  
6 96 in 2016, respectively and it increased steadily since 2010.<sup>18</sup> Lee, who performed a study  
7  
8 97 using the Korea Youth Risk Behavior Web-based Survey (KYRBWS), reported that < 7 h of  
9  
10 98 sleep per night in high school students was associated with increased cracker consumption.<sup>19</sup>  
11  
12

13 99 Meanwhile, studies of sleep deprivation should consider not only sleep duration but also  
14  
15 100 sleep quality. However, few studies have investigated the relationship between sleep duration,  
16  
17 101 along with sleep quality, and the intake of various foods while also adjusting for the  
18  
19 102 numerous confounding factors among adolescents in population-based datasets. Lee utilized  
20  
21 103 KYRBWS data which is population-based datasets with containing numerous variables, but  
22  
23 104 she did not consider the sleep quality.<sup>19</sup> The aim of our study was to identify the associations  
24  
25 105 between sleep duration and quality and food intake among adolescents by using KYRBWS  
26  
27 106 datasets. We utilized the data of the participants' level of recovery from fatigue after sleeping  
28  
29 107 as sleep quality.  
30  
31  
32

33 108

## 36 109 **MATERIALS AND METHODS**

### 39 110 **Data collection**

41 111 The Institutional Review Board (IRB) of the Centers for Disease Control and Prevention of  
42  
43 112 Korea (KCDC) approved this study (2014-06EXP-02-P-A). Written, informed consent was  
44  
45 113 obtained from each participant prior to the survey. Because this web-based survey was  
46  
47 114 performed at schools and included a large number of participants, informed consent from  
48  
49 115 their parents was exempted. This consent procedure was approved by the IRB of KCDC.  
50  
51  
52

53 116 This was a cross-sectional study using data from the KYRBWS, covering only Korea and  
54

1  
2  
3  
4 117 using statistical methods based on a designed sampling method and adjusted, weighted values.

5  
6 118 The results from the KYRBWS conducted in 2014 and 2015 were analyzed. The data were

7  
8 119 collected by the KCDC.

9  
10  
11 120

## 12 121 **Patient and Public Involvement**

13  
14  
15  
16 122 The survey consists of 125 questions assessing demographic characteristics and health-related

17  
18 123 behaviors. Korean adolescents from the 7<sup>th</sup> through 12<sup>th</sup> grade completed the self-

19  
20 124 administered questionnaire voluntarily and anonymously. Using 43 regions (considering

21  
22 125 administrative districts, geographic accessibility, the number of schools, and population size)

23  
24 126 and the school participants attended, the mother population was stratified into 129 levels to

25  
26 127 identify the sample distribution. Groups were then selected using stratified, two-stage

27  
28 128 (schools and classes) clustered sampling based on data from the Education Ministry.

29  
30 129 Sampling was weighted by statisticians, who performed a post-stratification step and

31  
32 130 considered non-response rates and extreme values. Detailed methods are described at the

33  
34 131 KYRBWS website (<https://yhs.cdc.go.kr/new/pages/main.asp>).

35  
36  
37  
38 132 Of a total of 140,103 participants, we excluded the following participants from analysis in

39  
40 133 this study; participants who slept less than 3 h or more than 12 h per night or who had no

41  
42 134 sleep records (18,594 participants); participants who did not give their age (403 participants);

43  
44 135 and participants without height or weight data (2,644 participants). Finally, 118,462

45  
46 136 participants (84.5% of total participants; 59,431 males; 59,031 females; 12 to 18 years old)

47  
48 137 were included in this study (Figure 1).

49  
50  
51  
52 138

1  
2  
3  
4 139 **Sleep duration and quality**

5  
6 140 The times at which participants fall asleep and wake up were recorded to within 10 min. The  
7  
8 141 participants were asked the time they fall asleep and the time they wake up for the 7 most  
9  
10 142 recent days classified into weekdays and weekends. Sleep duration was calculated by  
11  
12 143 subtracting the time they fall asleep from the time they wake up. The mean daily sleep  
13  
14 144 duration was calculated by adding weekday and weekend sleep durations with weights of 5/7  
15  
16 145 and 2/7, respectively. Sleep duration was divided into five groups: < 6 h (6(-) h),  $\geq 6$  h and <  
17  
18 146 7 h (6 h),  $\geq 7$  h and < 8 h (7 h),  $\geq 8$  h and < 9 h (8 h), and  $\geq 9$  h (9+ h). The participants were  
19  
20 147 asked about their recovery from fatigue after sleeping for the 7 most recent days (quality of  
21  
22 148 sleep). The answer options were very good, good, moderate, poor, and very poor. We  
23  
24 149 regrouped answers into three groups of sleep quality to simplify the categories: good (very  
25  
26 150 good and good), moderate, and poor (poor and very poor). We analyzed the association  
27  
28 151 between sleep quality and food consumption only in the 7 h and 8 h groups as sleep duration  
29  
30 152 was closely related to its quality (S1 Table).  
31  
32  
33  
34  
35  
36  
37

38 154 **Food intake frequency**

39  
40  
41 155 The KCDC collected the participants' certain food intake frequencies in the 7 most recent  
42  
43 156 days. The foods were fruits (not fruit juice), soda, soft drinks (including sports drinks, coffee-  
44  
45 157 based beverages, and fruit drinks; excluding soda), fast food (such as pizza, hamburgers, or  
46  
47 158 chicken), instant noodle, confectionaries, vegetables and milk. The data were divided into 4  
48  
49 159 groups:  $\geq 5$  times a week, 3-4 times a week, 1-2 times a week, and 0 time a week.  
50  
51

52 160  
53  
54  
55  
56  
57  
58  
59  
60

1  
2  
3  
4 161 **Health examination and socio-economic status**  
5

6 162 The participants were asked their weight (kg) and height (cm). Obesity levels were  
7  
8 163 categorized into 4 groups according to the Centers for Disease Control and Prevention  
9  
10 164 guidelines regarding body mass index (BMI, kg/m<sup>2</sup>) for children and teens<sup>20</sup> as follows:  
11  
12 165 obese,  $\geq 95^{\text{th}}$  percentile; overweight,  $\geq 85^{\text{th}}$  percentile and  $< 95^{\text{th}}$  percentile; healthy weight,  $\geq$   
13  
14 166  $5^{\text{th}}$  percentile and  $< 85^{\text{th}}$  percentile; and underweight,  $< 5^{\text{th}}$  percentile. The region of residence  
15  
16 167 was divided into 3 groups by administrative district: large city, small city, and rural area.  
17  
18 168 Subjective self-assessments of health were divided into 5 groups, from very good to very bad.  
19  
20 169 The stress level of participants was divided into 5 groups: severe, moderate, mild, a little, and  
21  
22 170 no stress. Self-reported economic level was grouped into 5 levels, from the highest to lowest.  
23  
24 171 Parent educational level was divided into 4 groups: graduated college or higher, graduated  
25  
26 172 high school, graduated middle school or below, unknown, and no parents. The participants  
27  
28 173 who did not know the educational level of their parents or who had no parents were not  
29  
30 174 excluded as this could have increased the number missing values for participants of relatively  
31  
32 175 lower economic levels.  
33  
34  
35  
36  
37  
38  
39

40 177 **Statistical Analysis**  
41  
42

43 178 Differences in the general characteristics according to sleep duration were calculated using  
44  
45 179 linear regression analysis with complex sampling for age. The rate differences in relation to  
46  
47 180 sex, region of residence, economic level, educational level of parents, stress level, food  
48  
49 181 consumption, and quality of sleep were compared using chi-square tests with Rao-Scott  
50  
51 182 corrections.  
52  
53  
54  
55  
56  
57  
58  
59  
60



1  
2  
3  
4 183 Adjusted odd ratios (AORs) for sleep duration in relation to food consumption were  
5  
6 184 calculated using multinomial logistic regression analysis with complex sampling for adjusted  
7  
8 185 covariates (age, sex, obesity, region of residence, stress level, economic level, and  
9  
10 186 educational level of parents).

11  
12  
13 187 AORs for sleep quality in relation to food consumption were calculated using  
14  
15 188 multinomial logistic regression analysis with complex sampling for adjusted covariates in the  
16  
17 189 7 h and 8 h groups.

18  
19  
20 190 Two-tailed analyses were conducted. P-values lower than 0.05 were considered to  
21  
22 191 indicate significance, and 95% confidence intervals (CIs) were calculated. The weighted  
23  
24 192 values recommended by the KYRBWS were applied, and all results are presented as  
25  
26 193 weighted values. The results were analyzed using SPSS ver. 21.0 (IBM, Armonk, NY, USA).

27  
28  
29  
30 194

31  
32 195 **RESULTS**

33  
34  
35 196 Analysis of the general characteristics of the study participants shows that an older age, being  
36  
37 197 female, reporting being healthy, living in a large city, feeling severe or moderate stress, being  
38  
39 198 at a lower economic level, and having higher parental educational levels were associated with  
40  
41 199 shorter sleep durations (all P values < 0.001, Table 1).

42  
43  
44 200

45  
46 201 **Table 1. General characteristics of participants according to sleep duration.**

| Factors | Total | Sleep duration |     |     |     |      | P-value |
|---------|-------|----------------|-----|-----|-----|------|---------|
|         |       | 6(-) h         | 6 h | 7 h | 8 h | 9+ h |         |
|         |       |                |     |     |     |      |         |

| Number              |            |            |            |            |            |            |         |
|---------------------|------------|------------|------------|------------|------------|------------|---------|
| n                   | 118,4      | 27,409     | 29,773     | 30,254     | 20,743     | 10,283     |         |
|                     | 62         |            |            |            |            |            |         |
| %                   | 100        | 23.1       | 25.1       | 25.5       | 17.5       | 8.7        |         |
| Mean Age (year, SD) | 15.0 (1.7) | 16.1 (1.5) | 15.5 (1.6) | 14.7 (1.6) | 13.9 (1.5) | 14.0 (1.6) | <0.001* |
| Sex (%)             |            |            |            |            |            |            | <0.001† |
| Male                | 50.2       | 41.8       | 47.7       | 52.3       | 57.1       | 59.5       |         |
| Female              | 49.8       | 58.2       | 52.3       | 47.7       | 42.9       | 40.5       |         |
| Obesity (%)         |            |            |            |            |            |            | <0.001† |
| Underweight         | 6.1        | 5.9        | 6.2        | 6.0        | 6.2        | 6.9        |         |
| Healthy             | 78.8       | 80.3       | 79.5       | 78.1       | 77.8       | 76.5       |         |
| Overweight          | 11.3       | 10.8       | 10.8       | 11.8       | 11.8       | 11.8       |         |
| Obese               | 3.8        | 3.0        | 3.5        | 4.1        | 4.2        | 4.8        |         |
| Region (%)          |            |            |            |            |            |            | <0.001† |
| Large City          | 44.7       | 49.4       | 46.6       | 43.3       | 40.6       | 39.0       |         |
| Small City          | 47.3       | 44.5       | 46.4       | 48.1       | 49.8       | 50.1       |         |
| Rural Area          | 8.0        | 6.1        | 7.1        | 8.6        | 9.6        | 10.9       |         |
| Stress (%)          |            |            |            |            |            |            | <0.001† |
| Severe              | 8.9        | 13.7       | 9.3        | 7.1        | 5.7        | 7.1        |         |
| Moderate            | 27.3       | 34.4       | 29.1       | 25.0       | 21.4       | 21.7       |         |
| Mild                | 43.8       | 39.9       | 45.1       | 45.8       | 44.8       | 42.8       |         |
| A little            | 16.6       | 10.1       | 14.3       | 18.8       | 23.0       | 21.9       |         |

|    |                    |      |      |      |      |      |         |
|----|--------------------|------|------|------|------|------|---------|
| 1  |                    |      |      |      |      |      |         |
| 2  |                    |      |      |      |      |      |         |
| 3  |                    |      |      |      |      |      |         |
| 4  | No                 | 3.3  | 1.9  | 2.3  | 3.3  | 5.2  | 6.6     |
| 5  |                    |      |      |      |      |      |         |
| 6  | Economic Level (%) |      |      |      |      |      | <0.001† |
| 7  |                    |      |      |      |      |      |         |
| 8  | Highest            | 8.1  | 7.3  | 6.9  | 7.9  | 9.5  | 11.1    |
| 9  |                    |      |      |      |      |      |         |
| 10 | Middle High        | 26.5 | 26.7 | 25.5 | 25.7 | 28.1 | 27.7    |
| 11 |                    |      |      |      |      |      |         |
| 12 | Middle             | 48.3 | 46.9 | 48.9 | 49.5 | 48.3 | 46.3    |
| 13 |                    |      |      |      |      |      |         |
| 14 | Middle Low         | 14.0 | 15.2 | 15.2 | 13.9 | 11.8 | 11.9    |
| 15 |                    |      |      |      |      |      |         |
| 16 | Lowest             | 3.2  | 3.9  | 3.5  | 3.0  | 2.3  | 3.0     |
| 17 |                    |      |      |      |      |      |         |
| 18 |                    |      |      |      |      |      |         |
| 19 | Educational level, |      |      |      |      |      | <0.001† |
| 20 |                    |      |      |      |      |      |         |
| 21 | Father (%)         |      |      |      |      |      |         |
| 22 |                    |      |      |      |      |      |         |
| 23 | Unknown            | 19.7 | 12.8 | 16.0 | 21.9 | 26.6 | 28.5    |
| 24 |                    |      |      |      |      |      |         |
| 25 | Middle School      | 2.7  | 2.6  | 2.8  | 2.8  | 2.4  | 2.6     |
| 26 |                    |      |      |      |      |      |         |
| 27 | High School        | 29.2 | 28.8 | 30.5 | 30.3 | 27.5 | 26.9    |
| 28 |                    |      |      |      |      |      |         |
| 29 | College, or over   | 48.4 | 55.8 | 50.8 | 45.0 | 43.6 | 42.0    |
| 30 |                    |      |      |      |      |      |         |
| 31 |                    |      |      |      |      |      |         |
| 32 | Educational level, |      |      |      |      |      | <0.001† |
| 33 |                    |      |      |      |      |      |         |
| 34 | Mother (%)         |      |      |      |      |      |         |
| 35 |                    |      |      |      |      |      |         |
| 36 | Unknown            | 18.9 | 12.0 | 15.2 | 21.0 | 25.8 | 28.1    |
| 37 |                    |      |      |      |      |      |         |
| 38 | Middle School      | 2.3  | 2.3  | 2.5  | 2.3  | 2.0  | 2.2     |
| 39 |                    |      |      |      |      |      |         |
| 40 | High School        | 37.1 | 39.1 | 39.3 | 37.1 | 33.7 | 31.8    |
| 41 |                    |      |      |      |      |      |         |
| 42 | College, or over   | 41.7 | 46.7 | 43.0 | 39.6 | 38.5 | 37.9    |
| 43 |                    |      |      |      |      |      |         |
| 44 |                    |      |      |      |      |      |         |

202 \* Linear regression analysis with complex sampling, Significance at  $P < 0.05$

203 † Chi-square test with Rao-Scott correction, Significance at  $P < 0.05$

204

205 Higher frequencies of instant noodle, fruits, vegetables, and milk intake were associated

206 with longer sleep durations, while higher frequencies of soda, soft drinks, fast food, and  
 207 confectionaries intake were associated with shorter sleep durations (all P values < 0.001,  
 208 Table 2).

209 **Table 2. Food consumption of participants according to sleep duration.**

| Factors          | Sleep duration |        |      |      |      |      | P-value |
|------------------|----------------|--------|------|------|------|------|---------|
|                  | Total          | 6(-) h | 6 h  | 7 h  | 8 h  | 9+ h |         |
| Fruits (%)       |                |        |      |      |      |      | <0.001* |
| ≥5 times a week  | 33.4           | 33.4   | 31.9 | 32.5 | 35.6 | 35.8 |         |
| 3-4 times a week | 28.9           | 28.2   | 29.0 | 29.2 | 29.4 | 28.0 |         |
| 1-2 times a week | 29.5           | 30.1   | 30.8 | 29.9 | 27.0 | 27.9 |         |
| 0 time a week    | 8.3            | 8.3    | 8.3  | 8.4  | 8.0  | 8.7  |         |
| Soda (%)         |                |        |      |      |      |      | <0.001* |
| ≥5 times a week  | 8.0            | 8.3    | 8.1  | 8.0  | 7.7  | 8.0  |         |
| 3-4 times a week | 18.2           | 17.2   | 18.8 | 18.8 | 18.2 | 17.4 |         |
| 1-2 times a week | 48.9           | 48.0   | 49.0 | 49.8 | 49.0 | 48.0 |         |
| 0 time a week    | 24.9           | 26.5   | 24.2 | 23.4 | 25.1 | 26.6 |         |
| Soft drinks (%)  |                |        |      |      |      |      | <0.001* |
| ≥5 times a week  | 13.9           | 16.3   | 14.5 | 13.1 | 12.0 | 11.6 |         |
| 3-4 times a week | 25.9           | 26.7   | 26.5 | 26.0 | 24.7 | 24.0 |         |
| 1-2 times a week | 44.1           | 42.2   | 43.9 | 44.8 | 45.6 | 44.6 |         |
| 0 time a week    | 16.1           | 14.7   | 15.0 | 16.1 | 17.7 | 19.8 |         |
| Fast food (%)    |                |        |      |      |      |      | <0.001* |
| ≥5 times a week  | 2.5            | 2.8    | 2.6  | 2.2  | 2.2  | 2.7  |         |

|                     |      |      |      |      |      |      |         |
|---------------------|------|------|------|------|------|------|---------|
| 3-4 times a week    | 11.9 | 12.6 | 12.8 | 11.7 | 10.6 | 10.7 |         |
| 1-2 times a week    | 59.8 | 60.0 | 60.7 | 60.5 | 58.8 | 56.2 |         |
| 0 time a week       | 25.8 | 24.6 | 23.8 | 25.5 | 28.3 | 30.3 |         |
| Instant noodle (%)  |      |      |      |      |      |      | <0.001* |
| ≥5 times a week     | 4.6  | 4.4  | 4.3  | 4.8  | 4.8  | 5.4  |         |
| 3-4 times a week    | 17.6 | 15.0 | 16.9 | 18.6 | 19.7 | 18.6 |         |
| 1-2 times a week    | 51.6 | 49.8 | 51.9 | 52.4 | 52.6 | 51.3 |         |
| 0 time a week       | 26.2 | 30.8 | 26.9 | 24.2 | 22.9 | 24.6 |         |
| Confectionaries (%) |      |      |      |      |      |      | <0.001* |
| ≥5 times a week     | 10.7 | 12.2 | 11.1 | 9.9  | 9.7  | 9.7  |         |
| 3-4 times a week    | 26.4 | 27.1 | 26.9 | 26.4 | 25.5 | 24.4 |         |
| 1-2 times a week    | 45.4 | 44.3 | 45.6 | 45.9 | 45.9 | 45.6 |         |
| 0 time a week       | 17.6 | 16.5 | 16.5 | 17.8 | 18.9 | 20.3 |         |
| Vegetables (%)      |      |      |      |      |      |      | <0.001* |
| ≥5 times a week     | 56.6 | 57.3 | 55.4 | 55.4 | 57.8 | 58.7 |         |
| 3-4 times a week    | 24.1 | 23.8 | 24.5 | 25.1 | 23.2 | 22.6 |         |
| 1-2 times a week    | 15.7 | 15.0 | 16.4 | 16.1 | 15.6 | 14.9 |         |
| 0 time a week       | 3.6  | 4.0  | 3.7  | 3.4  | 3.4  | 3.8  |         |
| Milk (%)            |      |      |      |      |      |      | <0.001* |
| ≥5 times a week     | 41.9 | 36.7 | 38.4 | 42.9 | 48.4 | 50.4 |         |
| 3-4 times a week    | 20.0 | 20.3 | 20.4 | 20.2 | 19.6 | 18.2 |         |
| 1-2 times a week    | 22.4 | 24.3 | 24.0 | 22.2 | 19.4 | 18.6 |         |
| 0 time a week       | 15.7 | 18.7 | 17.3 | 14.8 | 12.5 | 12.8 |         |

210 \* Chi-square test with Rao-Scott correction, Significance at P < 0.05

1  
2  
3  
4 211

5 212 Short sleep durations (< 6 h) were associated with a higher intake of soft drinks (AOR  
6 [95% CI] for  $\geq 5$  times a week, 1.73 [1.57-1.91];  $P < 0.001$ ) and with a higher intake of  
7 213 confectionaries (AOR [95% CI] for  $\geq 5$  times a week, 1.32 [1.20-1.46];  $P < 0.001$ ). Soda and  
8 214 fast food intake showed an increasing trend in the group getting < 6 h of sleep. However, it  
9 215 was not definite. Fruits, instant noodle, vegetables, and milk intake did not show an evident  
10 216 association with getting < 6 h of sleep per night despite the significant association with sleep  
11 217 duration overall (Table 3). Unadjusted model was also analyzed (S2 Table).  
12 218  
13  
14  
15  
16  
17  
18  
19  
20

21 219

22  
23  
24 220  
25  
26  
27  
28  
29  
30  
31  
32  
33  
34  
35  
36  
37  
38  
39  
40  
41  
42  
43  
44  
45  
46  
47  
48  
49  
50  
51  
52  
53  
54  
55  
56  
57  
58  
59  
60

221 **Table 3. Adjusted odd ratios of sleep duration for food consumption using multiple logistic regression analysis with complex sampling**  
 222 **(Reference of food frequency = 0 time a week).**

| Factors          | AOR (95% Confidence interval) of sleep duration |                  |                  |                  |      | P-value |
|------------------|-------------------------------------------------|------------------|------------------|------------------|------|---------|
|                  | 6(-) h                                          | 6 h              | 7 h              | 8 h              | 9+ h |         |
| Fruits (%)       |                                                 |                  |                  |                  |      | <0.001* |
| ≥5 times a week  | 1.07 (0.97-1.18)                                | 0.97 (0.89-1.06) | 0.95 (0.87-1.04) | 1.03 (0.94-1.12) | 1    |         |
| 3-4 times a week | 1.04 (0.94-1.15)                                | 1.05 (0.96-1.16) | 1.05 (0.95-1.15) | 1.11 (1.00-1.22) | 1    |         |
| 1-2 times a week | 0.98 (0.89-1.08)                                | 1.02 (0.92-1.12) | 1.03 (0.94-1.13) | 1.02 (0.92-1.12) | 1    |         |
| Soda (%)         |                                                 |                  |                  |                  |      | <0.001* |
| ≥5 times a week  | 1.27 (1.14-1.41)                                | 1.29 (1.17-1.42) | 1.27 (1.16-1.40) | 1.08 (0.97-1.19) | 1    |         |
| 3-4 times a week | 1.08 (1.00-1.17)                                | 1.25 (1.17-1.34) | 1.29 (1.21-1.38) | 1.13 (1.05-1.22) | 1    |         |
| 1-2 times a week | 1.00 (0.94-1.07)                                | 1.12 (1.06-1.18) | 1.20 (1.14-1.27) | 1.09 (1.03-1.16) | 1    |         |
| Soft drinks (%)  |                                                 |                  |                  |                  |      | <0.001* |
| ≥5 times a week  | 1.73 (1.57-1.91)                                | 1.57 (1.44-1.71) | 1.38 (1.26-1.50) | 1.16 (1.06-1.28) | 1    |         |

|                     |                  |                  |                  |                  |   |         |
|---------------------|------------------|------------------|------------------|------------------|---|---------|
| 3-4 times a week    | 1.36 (1.25-1.47) | 1.36 (1.37-1.46) | 1.28 (1.19-1.38) | 1.15 (1.07-1.24) | 1 |         |
| 1-2 times a week    | 1.16 (1.09-1.25) | 1.22 (1.15-1.30) | 1.18 (1.11-1.26) | 1.14 (1.07-1.22) | 1 |         |
| Fast food (%)       |                  |                  |                  |                  |   | <0.001* |
| ≥5 times a week     | 1.12 (0.95-1.32) | 1.15 (0.99-1.34) | 0.95 (0.82-1.11) | 0.86 (0.74-1.00) | 1 |         |
| 3-4 times a week    | 1.18 (1.08-1.29) | 1.31 (1.20-1.28) | 1.22 (1.12-1.32) | 1.07 (0.99-1.17) | 1 |         |
| 1-2 times a week    | 1.12 (1.05-1.19) | 1.22 (1.15-1.28) | 1.22 (1.15-1.28) | 1.13 (1.07-1.19) | 1 |         |
| Instant noodle (%)  |                  |                  |                  |                  |   | <0.001* |
| ≥5 times a week     | 1.09 (0.96-1.24) | 1.03 (0.91-1.17) | 1.07 (0.95-1.20) | 0.98 (0.87-1.11) | 1 |         |
| 3-4 times a week    | 0.93 (0.86-1.01) | 1.06 (0.98-1.14) | 1.15 (1.07-1.23) | 1.17 (1.08-1.26) | 1 |         |
| 1-2 times a week    | 0.92 (0.86-0.98) | 1.04 (0.98-1.10) | 1.09 (1.03-1.16) | 1.11 (1.04-1.18) | 1 |         |
| Confectionaries (%) |                  |                  |                  |                  |   | <0.001* |
| ≥5 times a week     | 1.32 (1.20-1.46) | 1.28 (1.17-1.41) | 1.10 (1.00-1.20) | 1.06 (0.97-1.17) | 1 |         |
| 3-4 times a week    | 1.20 (1.11-1.29) | 1.22 (1.13-1.31) | 1.16 (1.08-1.24) | 1.10 (1.02-1.18) | 1 |         |
| 1-2 times a week    | 1.09 (1.12-1.17) | 1.15 (1.07-1.23) | 1.11 (1.04-1.18) | 1.08 (1.01-1.16) | 1 |         |
| Vegetables (%)      |                  |                  |                  |                  |   | <0.001* |



1  
2  
3  
4  
5  
6  
7  
8  
9  
10  
11  
12  
13  
14  
15  
16  
17  
18  
19  
20  
21  
22  
23  
24  
25  
26  
27  
28  
29  
30  
31  
32  
33  
34  
35  
36  
37  
38  
39  
40  
41  
42  
43  
44  
45  
46  
47

|                  |                  |                  |                  |                  |         |
|------------------|------------------|------------------|------------------|------------------|---------|
| ≥5 times a week  | 0.96 (0.85-1.10) | 0.95 (0.83-1.07) | 1.04 (0.92-1.17) | 1.07 (0.94-1.22) | 1       |
| 3-4 times a week | 0.92 (0.80-1.05) | 0.98 (0.86-1.12) | 1.15 (1.02-1.30) | 1.10 (0.96-1.25) | 1       |
| 1-2 times a week | 0.91 (0.79-1.05) | 1.02 (0.90-1.17) | 1.17 (1.03-1.33) | 1.15 (1.01-1.33) | 1       |
| Milk (%)         |                  |                  |                  |                  | <0.001* |
| ≥5 times a week  | 0.99 (0.91-1.07) | 0.91 (0.85-0.98) | 0.92 (0.85-0.99) | 0.97 (0.89-1.04) | 1       |
| 3-4 times a week | 1.06 (0.97-1.15) | 1.04 (0.96-1.13) | 1.09 (1.00-1.18) | 1.09 (1.00-1.19) | 1       |
| 1-2 times a week | 1.01 (0.93-1.09) | 1.05 (0.97-1.14) | 1.06 (0.98-1.14) | 1.03 (0.95-1.12) | 1       |

\* Significance at P < 0.05

226 Sleep quality was also associated with the frequency of food intake. Poor quality of sleep  
 227 was associated with a lower intake of fruits, vegetables, and milk (AOR [95% CI] for  $\geq 5$   
 228 times a week for fruits, 0.71 [0.65-0.77]; vegetables, 0.66 [0.58-0.75]; and milk, 0.80 [0.74-  
 229 0.86]; each  $P < 0.001$ ). Poor sleep quality was also related with a higher intake of soda, soft  
 230 drinks, fast food, instant noodle, and confectionaries (AOR [95% CI] for  $\geq 5$  times a week for  
 231 soda, 1.55 [1.40-1.70]; soft drinks, 1.58 [1.43-1.73]; fast food, 1.97 [1.65-2.35]; instant  
 232 noodle, 1.55 [1.37-1.76]; and confectionaries, 1.30 [1.18-1.43]; each  $P < 0.001$ , Table 4).

233

234 **Table 4. Adjusted odd ratios of quality of sleep for food consumption using multiple**  
 235 **logistic regression analysis with complex sampling (Reference of food frequency = 0 time**  
 236 **a week) in 7 h and 8 h groups.**

| Factors               | Quality of sleep |                  |                  | P-value |
|-----------------------|------------------|------------------|------------------|---------|
|                       | Good             | Moderate         | Poor             |         |
| Fruits (%)            |                  |                  |                  | <0.001* |
| $\geq 5$ times a week | 1                | 0.81 (0.74-0.89) | 0.71 (0.65-0.77) |         |
| 3-4 times a week      | 1                | 0.93 (0.85-1.01) | 0.79 (0.72-0.87) |         |
| 1-2 times a week      | 1                | 1.00 (0.92-1.09) | 0.90 (0.82-0.99) |         |
| Soda (%)              |                  |                  |                  | <0.001* |
| $\geq 5$ times a week | 1                | 1.27 (1.16-1.40) | 1.55 (1.40-1.70) |         |
| 3-4 times a week      | 1                | 1.25 (1.16-1.33) | 1.35 (1.25-1.45) |         |
| 1-2 times a week      | 1                | 1.14 (1.08-1.20) | 1.15 (1.08-1.22) |         |
| Soft drinks (%)       |                  |                  |                  | <0.001* |

|    |                     |   |                  |                  |         |
|----|---------------------|---|------------------|------------------|---------|
| 1  |                     |   |                  |                  |         |
| 2  |                     |   |                  |                  |         |
| 3  |                     |   |                  |                  |         |
| 4  | ≥5 times a week     | 1 | 1.24 (1.15-1.35) | 1.58 (1.43-1.73) |         |
| 5  |                     |   |                  |                  |         |
| 6  | 3-4 times a week    | 1 | 1.21 (1.13-1.29) | 1.36 (1.26-1.46) |         |
| 7  |                     |   |                  |                  |         |
| 8  | 1-2 times a week    | 1 | 1.09 (1.03-1.16) | 1.10 (1.03-1.18) |         |
| 9  |                     |   |                  |                  |         |
| 10 | Fast food (%)       |   |                  |                  | <0.001* |
| 11 |                     |   |                  |                  |         |
| 12 | ≥5 times a week     | 1 | 1.26 (1.07-1.49) | 1.97 (1.65-2.35) |         |
| 13 |                     |   |                  |                  |         |
| 14 | 3-4 times a week    | 1 | 1.28 (1.19-1.38) | 1.49 (1.37-1.62) |         |
| 15 |                     |   |                  |                  |         |
| 16 | 1-2 times a week    | 1 | 1.11 (1.06-1.17) | 1.18 (1.11-1.25) |         |
| 17 |                     |   |                  |                  |         |
| 18 | Instant noodle (%)  |   |                  |                  | <0.001* |
| 19 |                     |   |                  |                  |         |
| 20 |                     |   |                  |                  |         |
| 21 | ≥5 times a week     | 1 | 1.29 (1.14-1.45) | 1.55 (1.37-1.76) |         |
| 22 |                     |   |                  |                  |         |
| 23 | 3-4 times a week    | 1 | 1.27 (1.19-1.36) | 1.31 (1.22-1.42) |         |
| 24 |                     |   |                  |                  |         |
| 25 | 1-2 times a week    | 1 | 1.14 (1.09-1.20) | 1.11 (1.05-1.18) |         |
| 26 |                     |   |                  |                  |         |
| 27 | Confectionaries (%) |   |                  |                  | <0.001* |
| 28 |                     |   |                  |                  |         |
| 29 |                     |   |                  |                  |         |
| 30 | ≥5 times a week     | 1 | 1.13 (1.03-1.23) | 1.30 (1.18-1.43) |         |
| 31 |                     |   |                  |                  |         |
| 32 | 3-4 times a week    | 1 | 1.12 (1.04-1.19) | 1.08 (1.01-1.17) |         |
| 33 |                     |   |                  |                  |         |
| 34 | 1-2 times a week    | 1 | 1.05 (0.99-1.12) | 1.00 (0.93-1.07) |         |
| 35 |                     |   |                  |                  |         |
| 36 | Vegetables (%)      |   |                  |                  | <0.001* |
| 37 |                     |   |                  |                  |         |
| 38 |                     |   |                  |                  |         |
| 39 | ≥5 times a week     | 1 | 0.97 (0.86-1.10) | 0.66 (0.58-0.75) |         |
| 40 |                     |   |                  |                  |         |
| 41 | 3-4 times a week    | 1 | 1.14 (1.00-1.30) | 0.78 (0.68-0.89) |         |
| 42 |                     |   |                  |                  |         |
| 43 | 1-2 times a week    | 1 | 1.30 (1.14-1.49) | 0.98 (0.85-1.12) |         |
| 44 |                     |   |                  |                  |         |
| 45 | Milk (%)            |   |                  |                  | <0.001* |
| 46 |                     |   |                  |                  |         |
| 47 |                     |   |                  |                  |         |
| 48 | ≥5 times a week     | 1 | 0.89 (0.83-0.95) | 0.80 (0.74-0.86) |         |
| 49 |                     |   |                  |                  |         |
| 50 | 3-4 times a week    | 1 | 1.01 (0.94-1.09) | 0.86 (0.79-0.93) |         |
| 51 |                     |   |                  |                  |         |
| 52 | 1-2 times a week    | 1 | 0.99 (0.92-1.06) | 0.91 (0.84-0.99) |         |

237 \* Significance at P < 0.05

238

239 **DISCUSSION**

240 We found that shorter sleep durations were associated with higher frequencies of consuming  
241 soft drinks and confectionaries than longer sleep durations. Additionally, poor sleep quality,  
242 with 7 to 8 h of sleep per night, was associated with a lower frequency of fruits, vegetables  
243 and milk intake, and a higher frequency of soda, soft drinks, fast food, instant noodle and  
244 confectionaries intake. These results are consistent with the results from previous studies in  
245 regard to the association between sleep duration and food consumption.<sup>13-15 19</sup> Furthermore,  
246 we found an association between not only sleep duration but also between sleep quality and  
247 the intake of various foods.

248 Along with these outcomes, sleep duration in association with sleep quality might affect  
249 one's appetite and even be related to health problems such as obesity<sup>21</sup> and diabetes.<sup>22</sup> A  
250 short sleep duration or poor sleep quality is associated with appetite-related hormonal  
251 changes such as lower leptin and higher ghrelin levels in previous studies. These results were  
252 also associated with greater energy intake and a higher BMI.<sup>16 17</sup> Baron et al. reported that  
253 people who fall asleep later sleep less and consume more calories than people who fall asleep  
254 earlier. Moreover, consuming calories after 8 pm was associated with a higher BMI.<sup>21</sup>  
255 Rudnicka et al. reported that shorter sleep durations in children were associated with a higher  
256 prevalence of risk factors for type 2 diabetes, such as increases in the fat mass index, insulin  
257 resistance and fasting glucose level.<sup>22</sup> Meanwhile, Doo et al. reported that participants with  
258 shorter sleep durations and a higher consumption of dietary antioxidant vitamins had a lower  
259 risk of obesity than those with a lower consumption of dietary antioxidant vitamins.<sup>23</sup> In  
260 summary, a short sleep duration in association with poor sleep quality could affect dietary

1  
2  
3  
4 261 habits and appetite, which could result in health problems. Nevertheless, people who sleep for  
5  
6 262 shorter durations can reduce the risks of health problems by consuming foods rich in  
7  
8 263 micronutrients such as vitamins.  
9

10  
11 264 Although nutrient profiles were not available in our study, sugar-sweetened beverages  
12  
13 265 such as soda and soft drinks, confectionaries, fast food, and instant noodle have higher energy  
14  
15 266 levels but less micronutrients than fruits, vegetables, and milk. Sugar-sweetened beverages  
16  
17 267 contain mainly liquid calories provided by sugars and have very few of other nutrients. A  
18  
19 268 potential biological mechanism for sugar-sweetened beverages leading to obesity is that  
20  
21 269 liquid calories may result in decreased satiety, leading to the consumption of more sugar-  
22  
23 270 sweetened beverages with subsequent weight gain.<sup>24</sup>  
24  
25

26  
27 271 Fast food, confectionaries, and instant noodle contain high energy densities, with calories  
28  
29 272 derived from carbohydrates and fats and with minimal amounts of other nutrients.  
30  
31 273 Nevertheless, humans have a weak innate ability to recognize energy density, so humans fail  
32  
33 274 to down-regulation the consumption of most of these foods accordingly.<sup>25</sup> Obesity is one of  
34  
35 275 the risk factors of type 2 diabetes because it is related to an increase in insulin resistance.<sup>26</sup>  
36  
37 276 In fact, previous studies reported that sugar-sweetened beverage and fast food consumption  
38  
39 277 were associated with not only changes in bodyweight but also increased insulin resistance.<sup>24</sup>  
40  
41 278 <sup>27</sup>Hence, consumption of these foods could be a potential mechanistic link between sleep  
42  
43 279 duration in association with quality and health problems, including obesity and type 2  
44  
45 280 diabetes in adolescents.  
46  
47

48  
49 281 On the other hand, food intake might affect sleep duration and sleep quality. Fruits,  
50  
51 282 vegetables, and milk are sources of vitamins and minerals. Grandner et al. reported that sleep  
52  
53 283 symptoms such as difficulty falling asleep, difficulty maintaining sleep, non-restorative sleep,  
54

1  
2  
3  
4 284 and daytime sleepiness were associated with a lower intake of calcium, potassium, selenium,  
5  
6 285 vitamin C, vitamin D, alpha-carotene, and lycopene.<sup>28</sup> Although mechanistic links between  
7  
8 286 vitamin intake and sleep quality are unclear, previous studies have verified the relationship  
9  
10 287 between sleep duration and vitamin intake.<sup>29 30</sup> In addition, Grandner et al. reported that  
11  
12 288 sleep symptoms associated with poor sleep quality were associated with a higher intake of  
13  
14 289 salt<sup>28</sup>, and fast food and instant noodle intake are associated with salt intake. In accordance  
15  
16 290 with the Korean food composition table, the sodium content of cooked hamburger is 498  
17  
18 291 mg/100 g, and that of cheese pizza is 447 mg/100 g. Instant noodle seasoning contains 2,225  
19  
20 292 mg of sodium in one portion (10.5 g).<sup>31</sup> Excessive salt (and therefore sodium) intake leads to  
21  
22 293 elevated blood pressure, whereas calcium and potassium lower blood pressure.<sup>32</sup> Fereidoun  
23  
24 294 et al. reported that providing 0.05 g/kg of salt to participants resulted in poor sleep quality.<sup>33</sup>  
25  
26 295 According to a study by Javaheri et al., poor sleep quality in adolescents was associated with  
27  
28 296 prehypertension.<sup>34</sup> The findings of previous studies and those of our study show that  
29  
30 297 consuming foods with high levels of salt and low levels of other micronutrients might result  
31  
32 298 in reduced sleep durations and poor sleep quality.  
33  
34  
35

36  
37 299 The limitations of our study are as follows. First, our study was based on data collected  
38  
39 300 by the KYRBWS, and as secondary data, it has some limitations in providing specific  
40  
41 301 information. For example, the dataset did not have information on nutrient contents or the  
42  
43 302 quantity of food consumed to go along with intake frequency data. In addition, data on other  
44  
45 303 confounding factors such as school examination periods or the timing of food intake across  
46  
47 304 the 24 h were not present. Second, because the data were collected based on a self-reported  
48  
49 305 questionnaire including weight and height, the precision of the information may be low such  
50  
51 306 as BMI have possibility of underestimation.<sup>35</sup> Third, the validity of questionnaires of sleep  
52  
53  
54

1  
2  
3  
4 307 duration, sleep quality and food intake frequencies is unclear. Hence, the responses on the  
5  
6 308 questionnaire may not represent the usual sleep duration, sleep quality or food intake  
7  
8 309 frequency of each participant. To collect usual sleep duration, sleep quality and food intake  
9  
10 310 data, the validity and reliability of the questionnaire should be evaluated in a further study.  
11  
12 311 Finally, because of the cross-sectional design, the causal relationship between sleep duration  
13  
14 312 and quality and food intake frequency is unclear. Longitudinal, randomized, controlled  
15  
16 313 studies should be conducted to determine the causal relationship.  
17  
18

19 314 Nevertheless, our findings provide valuable information for the following reasons. First,  
20  
21 315 our study was conducted on a representative population of Korean adolescents. Second, we  
22  
23 316 considered numerous socio-economic status variables as confounding factors to investigate  
24  
25 317 the independent relationship between sleep status and food consumption. Third, we  
26  
27 318 considered not only sleep duration but also sleep quality in explaining sleep status. Finally,  
28  
29 319 we investigated the intake frequency of various foods to show the relationship between sleep  
30  
31 320 status and food consumption.  
32  
33  
34

35 321

## 38 322 **CONCLUSION**

39  
40  
41 323 A short sleep duration was related to a higher frequency of soft drinks and confectionaries  
42  
43 324 intake. Additionally, poor sleep quality with a normal sleep duration was related to a lower  
44  
45 325 frequency of fruits, vegetables and milk intake, and a higher frequency of soda, soft drinks,  
46  
47 326 fast food, instant noodle and confectionaries intake in adolescents. Hence, we demonstrate  
48  
49 327 that short sleep durations and poor sleep quality might be associated with unhealthy food  
50  
51 328 consumption, such as consuming more sugar-sweetened beverages, fast food, instant noodle  
52  
53 329 and confectionaries, and fewer fruits, vegetables and milk. Further studies with a longitudinal,  
54

1  
2  
3  
4 330 randomized, controlled design are needed to elucidate the specific causal relationship  
5  
6 331 between sleep status and food consumption in adolescents.  
7  
8

9 332

10  
11 333 **ACKNOWLEDGMENTS**  
12

13  
14 334 We thanks to the survey participants and examiners of the Division of Chronic Disease  
15  
16 335 Surveillance in the Korea Centers for Disease Control & Prevention for participating in this  
17  
18 336 survey and providing the data.  
19

20  
21 337

22  
23  
24 338 **DATA SHARING STATEMENT**  
25

26  
27 339 No additional data are available.  
28

29  
30 340

31  
32 341 **FUNDING STATEMENT**  
33

34  
35 342 This research was supported by Hallym University Research Fund.  
36  
37

38 343

39  
40  
41 344 **COMPETING INTERESTS STATEMENT**  
42

43  
44 345 There are no competing interests for any author.  
45

46 346

47  
48  
49 347 **CONTRIBUTORS**  
50

51  
52 348 CM wrote the manuscript. HJK designed the study. ISP performed the data processing. BP  
53  
54



1  
2  
3  
4  
5  
6  
7  
8  
9  
10  
11  
12  
13  
14  
15  
16  
17  
18  
19  
20  
21  
22  
23  
24  
25  
26  
27  
28  
29  
30  
31  
32  
33  
34  
35  
36  
37  
38  
39  
40  
41  
42  
43  
44  
45  
46  
47  
48  
49  
50  
51  
52  
53  
54  
55  
56  
57  
58  
59  
60

349 performed the data interpretation. JHK analyzed the data. SS gave statistical techniques and  
350 reviewed the manuscript. HGC conceptualized the study and wrote and reviewed the  
351 manuscript.

For peer review only

352 **REFERENCES**

- 353 1. National Sleep Foundation. Teens and Sleep. Available from:  
354 <https://sleepfoundation.org/sleep-topics/teens-and-sleep> accessed 8/29 2017.
- 355 2. Keyes KM, Maslowsky J, Hamilton A, et al. The great sleep recession: changes in sleep  
356 duration among US adolescents, 1991-2012. *Pediatrics* 2015;135(3):460-8. doi:  
357 10.1542/peds.2014-2707 [published Online First: 2015/02/18]
- 358 3. Cain N, Gradisar M. Electronic media use and sleep in school-aged children and  
359 adolescents: A review. *Sleep medicine* 2010;11(8):735-42. doi:  
360 10.1016/j.sleep.2010.02.006 [published Online First: 2010/08/03]
- 361 4. Ming X, Koransky R, Kang V, et al. Sleep insufficiency, sleep health problems and  
362 performance in high school students. *Clinical medicine insights Circulatory, respiratory  
363 and pulmonary medicine* 2011;5:71-9. doi: 10.4137/ccrpm.s7955 [published Online First:  
364 2011/11/16]
- 365 5. Meldrum RC, Restivo E. The behavioral and health consequences of sleep deprivation  
366 among U.S. high school students: relative deprivation matters. *Preventive medicine*  
367 2014;63:24-8. doi: 10.1016/j.ypmed.2014.03.006 [published Online First: 2014/03/19]
- 368 6. Smaldone A, Honig JC, Byrne MW. Sleepless in America: inadequate sleep and  
369 relationships to health and well-being of our nation's children. *Pediatrics* 2007;119 Suppl  
370 1:S29-37. doi: 10.1542/peds.2006-2089F [published Online First: 2007/02/03]
- 371 7. Wolfson AR, Carskadon MA. Understanding adolescents' sleep patterns and school  
372 performance: a critical appraisal. *Sleep medicine reviews* 2003;7(6):491-506. [published  
373 Online First: 2004/03/17]

- 1  
2  
3  
4 374 8. Fatima Y, Doi SA, Mamun AA. Longitudinal impact of sleep on overweight and obesity in  
5  
6 375 children and adolescents: a systematic review and bias-adjusted meta-analysis. *Obesity*  
7  
8 376 reviews : an official journal of the International Association for the Study of Obesity  
9  
10 377 2015;16(2):137-49. doi: 10.1111/obr.12245 [published Online First: 2015/01/16]  
11  
12  
13 378 9. World Health Organization. Obesity and overweight. Available from:  
14  
15 379 <http://www.who.int/mediacentre/factsheets/fs311/en/> accessed 3/7 2018.  
16  
17  
18 380 10. World Health Organization. What are the causes?: Reasons for children and adolescents to  
19  
20 381 become obese. Available from:  
21  
22 382 [http://www.who.int/dietphysicalactivity/childhood\\_why/en/](http://www.who.int/dietphysicalactivity/childhood_why/en/) accessed 8/31 2017.  
23  
24  
25 383 11. Bucher Della Torre S, Keller A, Laure Depeyre J, et al. Sugar-Sweetened Beverages and  
26  
27 384 Obesity Risk in Children and Adolescents: A Systematic Analysis on How  
28  
29 385 Methodological Quality May Influence Conclusions. *Journal of the Academy of*  
30  
31 386 *Nutrition and Dietetics* 2016;116(4):638-59. doi: 10.1016/j.jand.2015.05.020 [published  
32  
33 387 Online First: 2015/07/22]  
34  
35  
36 388 12. Schwingshackl L, Hobl LP, Hoffmann G. Effects of low glycaemic index/low glycaemic  
37  
38 389 load vs. high glycaemic index/ high glycaemic load diets on overweight/obesity and  
39  
40 390 associated risk factors in children and adolescents: a systematic review and meta-analysis.  
41  
42 391 *Nutrition journal* 2015;14:87. doi: 10.1186/s12937-015-0077-1 [published Online First:  
43  
44 392 2015/10/23]  
45  
46  
47  
48 393 13. Ferranti R, Marventano S, Castellano S, et al. Sleep quality and duration is related with  
49  
50 394 diet and obesity in young adolescent living in Sicily, Southern Italy. *Sleep science (Sao*  
51  
52 395 *Paulo, Brazil)* 2016;9(2):117-22. doi: 10.1016/j.slsci.2016.04.003 [published Online First:  
53  
54

- 1  
2  
3  
4 396 2016/09/23]
- 5  
6  
7 397 14. Gong QH, Li H, Zhang XH, et al. Associations between sleep duration and physical  
8  
9 398 activity and dietary behaviors in Chinese adolescents: results from the Youth Behavioral  
10  
11 399 Risk Factor Surveys of 2015. *Sleep medicine* 2017;37:168-73. doi:  
12  
13 400 10.1016/j.sleep.2017.06.024 [published Online First: 2017/09/14]
- 14  
15  
16 401 15. Kruger AK, Reither EN, Peppard PE, et al. Do sleep-deprived adolescents make less-  
17  
18 402 healthy food choices? *The British journal of nutrition* 2014;111(10):1898-904. doi:  
19  
20 403 10.1017/s0007114514000130 [published Online First: 2014/02/15]
- 21  
22  
23 404 16. Gonnissen HK, Hursel R, Rutters F, et al. Effects of sleep fragmentation on appetite and  
24  
25 405 related hormone concentrations over 24 h in healthy men. *The British journal of nutrition*  
26  
27 406 2013;109(4):748-56. doi: 10.1017/s0007114512001894 [published Online First:  
28  
29 407 2012/06/12]
- 30  
31  
32 408 17. Taheri S, Lin L, Austin D, et al. Short sleep duration is associated with reduced leptin,  
33  
34 409 elevated ghrelin, and increased body mass index. *PLoS medicine* 2004;1(3):e62. doi:  
35  
36 410 10.1371/journal.pmed.0010062 [published Online First: 2004/12/17]
- 37  
38  
39 411 18. Korea National Health and Nutrition Examination Survey. *Korea Health Statistics* 2016:  
40  
41 412 Korea National Health and Nutrition Examination Survey (KNHANES VII-1), 2018.
- 42  
43  
44  
45 413 19. Lee J. Sleep duration's association with diet, physical activity, mental status, and weight  
46  
47 414 among Korean high school students. *Asia Pacific journal of clinical nutrition*  
48  
49 415 2017;26(5):906-13. doi: 10.6133/apjcn.082016.04 [published Online First: 2017/08/15]
- 50  
51  
52 416 20. Centers for Disease Control and Prevention. About BMI for Children and Teens.
- 53  
54

- 1  
2  
3  
4 417 Available from:  
5  
6 418 [http://www.cdc.gov/healthyweight/assessing/bmi/childrens\\_bmi/about\\_childrens\\_bmi.ht](http://www.cdc.gov/healthyweight/assessing/bmi/childrens_bmi/about_childrens_bmi.html)  
7  
8 419 ml accessed 11/14 2014.  
9  
10  
11 420 21. Baron KG, Reid KJ, Kern AS, et al. Role of sleep timing in caloric intake and BMI.  
12  
13 421 Obesity (Silver Spring, Md) 2011;19(7):1374-81. doi: 10.1038/oby.2011.100 [published  
14  
15 422 Online First: 2011/04/30]  
16  
17  
18 423 22. Rudnicka AR, Nightingale CM, Donin AS, et al. Sleep Duration and Risk of Type 2  
19  
20 424 Diabetes. Pediatrics 2017;140(3) doi: 10.1542/peds.2017-0338 [published Online First:  
21  
22 425 2017/08/16]  
23  
24  
25 426 23. Doo M, Kim Y. The Consumption of Dietary Antioxidant Vitamins Modifies the Risk of  
26  
27 427 Obesity among Korean Men with Short Sleep Duration. Nutrients 2017;9(7) doi:  
28  
29 428 10.3390/nu9070780 [published Online First: 2017/07/21]  
30  
31  
32 429 24. Hu FB, Malik VS. Sugar-sweetened beverages and risk of obesity and type 2 diabetes:  
33  
34 430 epidemiologic evidence. Physiology & behavior 2010;100(1):47-54. doi:  
35  
36 431 10.1016/j.physbeh.2010.01.036 [published Online First: 2010/02/09]  
37  
38  
39 432 25. Prentice AM, Jebb SA. Fast foods, energy density and obesity: a possible mechanistic link.  
40  
41 433 Obesity reviews : an official journal of the International Association for the Study of  
42  
43 434 Obesity 2003;4(4):187-94. [published Online First: 2003/12/03]  
44  
45  
46 435 26. Edelstein SL, Knowler WC, Bain RP, et al. Predictors of progression from impaired  
47  
48 436 glucose tolerance to NIDDM: an analysis of six prospective studies. Diabetes  
49  
50 437 1997;46(4):701-10. [published Online First: 1997/04/01]  
51  
52  
53 438 27. Pereira MA, Kartashov AI, Ebbeling CB, et al. Fast-food habits, weight gain, and insulin

- 1  
2  
3  
4 439 resistance (the CARDIA study): 15-year prospective analysis. *Lancet* (London, England)  
5 440 2005;365(9453):36-42. doi: 10.1016/s0140-6736(04)17663-0 [published Online First:  
6 441 2005/01/11]
- 7  
8  
9  
10  
11 442 28. Grandner MA, Jackson N, Gerstner JR, et al. Sleep symptoms associated with intake of  
12 443 specific dietary nutrients. *Journal of sleep research* 2014;23(1):22-34. doi:  
13 444 10.1111/jsr.12084 [published Online First: 2013/09/03]
- 14  
15  
16  
17  
18 445 29. Majid MS, Ahmad HS, Bizhan H, et al. The effect of vitamin D supplement on the score  
19 446 and quality of sleep in 20-50 year-old people with sleep disorders compared with control  
20 447 group. *Nutritional neuroscience* 2017:1-9. doi: 10.1080/1028415x.2017.1317395  
21 448 [published Online First: 2017/05/06]
- 22  
23  
24  
25  
26  
27 449 30. Peuhkuri K, Sihvola N, Korpela R. Diet promotes sleep duration and quality. *Nutrition*  
28 450 *research* (New York, NY) 2012;32(5):309-19. doi: 10.1016/j.nutres.2012.03.009  
29 451 [published Online First: 2012/06/02]
- 30  
31  
32  
33  
34 452 31. Department of Agrofood Resources, NAAS, RDA, et al. 8th revision Standard Food  
35 453 Composition Table, 2013.
- 36  
37  
38  
39 454 32. Karppanen H, Mervaala E. Sodium intake and hypertension. *Progress in cardiovascular*  
40 455 *diseases* 2006;49(2):59-75. doi: 10.1016/j.pcad.2006.07.001 [published Online First:  
41 456 2006/10/19]
- 42  
43  
44  
45  
46 457 33. Fereidoun H, Pouria H. Effect of excessive salt consumption on night's sleep. *Pak J*  
47 458 *physiol* 2014;10(3-4):6-9.
- 48  
49  
50  
51 459 34. Javaheri S, Storfer-Isser A, Rosen CL, et al. Sleep quality and elevated blood pressure in  
52 460 adolescents. *Circulation* 2008;118(10):1034-40. doi: 10.1161/circulationaha.108.766410

1  
2  
3  
4 461 [published Online First: 2008/08/20]  
5

6 462 35. Bae J, Joung H, Kim JY, et al. Validity of self-reported height, weight, and body mass  
7

8 463 index of the Korea Youth Risk Behavior Web-based Survey questionnaire. Journal of  
9

10 464 preventive medicine and public health = Yebang Uihakhoe chi 2010;43(5):396-402. doi:  
11

12 465 10.3961/jpmph.2010.43.5.396 [published Online First: 2010/10/21]  
13  
14  
15  
16  
17  
18  
19  
20  
21  
22  
23  
24  
25  
26  
27  
28  
29  
30  
31  
32  
33  
34  
35  
36  
37  
38  
39  
40  
41  
42  
43  
44  
45  
46  
47  
48  
49  
50  
51  
52  
53  
54

1  
2  
3  
4 466 **FIGURE**

5  
6 467 **Figure 1. A schematic illustration of the participant selection.** From a total of 140,103  
7  
8 468 participants, those getting < 3 h or > 12 h of sleep per night or with no sleep records (n =  
9  
10 469 18,594), without a record of their age (403) or without height or weight data (2,644) were  
11  
12 470 excluded. The data for the 118,462 participants from whom complete records were obtained  
13  
14 471 were analyzed.  
15  
16  
17  
18 472

19  
20  
21 473 **SUPPLEMENTARY FILES**

22  
23 474 **S1 Table. Quality of sleep rates of participants according to sleep duration.** \* Chi-square  
24  
25 475 test with Rao-Scott correction, Significance at  $P < 0.05$   
26  
27

28 476 **S2 Table. Unadjusted odd ratios of sleep duration for food consumption using multiple**  
29  
30 477 **logistic regression analysis with complex sampling (Reference of food frequency = 0 time**  
31  
32 478 **a week).** \* Significance at  $P < 0.05$   
33  
34

35  
36 479  
37

38  
39 480  
40

41 481  
42

43 482  
44

45 483  
46  
47  
48  
49  
50  
51  
52  
53  
54





**Figure 1. A schematic illustration of the participant selection.**

Among a total of 140,103 participants, the participants Participants with < 3 h, > 12 h, or no record of sleep (n = 18,594) or without record of age (403) and height or weight records (2,644) were excluded. The data for the 118,462 participants from whom complete data were obtained were analyzed.

254x190mm (300 x 300 DPI)

**S1 Table. Quality of sleep rates of participants according to sleep duration.**

| Factors              | Total | Sleep time |      |      |      |      | P-value |
|----------------------|-------|------------|------|------|------|------|---------|
|                      |       | 6(-) h     | 6 h  | 7 h  | 8 h  | 9+ h |         |
| Quality of sleep (%) |       |            |      |      |      |      | <0.001* |
| Good                 | 26.6  | 10.1       | 17.9 | 29.8 | 45.4 | 48.3 |         |
| Moderate             | 32.9  | 25.7       | 35.0 | 37.8 | 33.9 | 29.9 |         |
| Poor                 | 40.5  | 64.2       | 47.0 | 32.4 | 20.7 | 21.8 |         |

\* Chi-square test with Rao-Scott correction, Significance at  $P < 0.05$

**S2 Table. Unadjusted odd ratios of sleep duration for food consumption using multiple logistic regression analysis with complex sampling (Reference of food frequency = 0 time a week).**

| Factors          | AOR (95% Confidence interval) of Sleep time |                  |                  |                  |      | P-value |
|------------------|---------------------------------------------|------------------|------------------|------------------|------|---------|
|                  | 6(-) h                                      | 6 h              | 7 h              | 8 h              | 9+ h |         |
| Fruits (%)       |                                             |                  |                  |                  |      | <0.001* |
| ≥5 times a week  | 0.95 (0.87-1.04)                            | 0.89 (0.82-0.97) | 0.92 (0.84-1.00) | 1.06 (0.97-1.16) | 1    |         |
| 3-6 times a week | 1.06 (0.97-1.16)                            | 1.09 (0.99-1.19) | 1.07 (0.98-1.18) | 1.15 (1.04-1.26) | 1    |         |
| 1-2 times a week | 1.13 (1.03-1.24)                            | 1.14 (1.05-1.25) | 1.11 (1.01-1.21) | 1.04 (0.95-1.14) | 1    |         |
| Soda (%)         |                                             |                  |                  |                  |      | <0.001* |
| ≥5 times a week  | 1.07 (0.96-1.20)                            | 1.12 (1.02-1.24) | 1.14 (1.04-1.26) | 1.01 (0.92-1.12) | 1    |         |
| 3-6 times a week | 1.02 (0.94-1.10)                            | 1.20 (1.12-1.29) | 1.25 (1.17-1.33) | 1.10 (1.02-1.18) | 1    |         |
| 1-2 times a week | 1.02 (0.96-1.08)                            | 1.14 (1.08-1.21) | 1.21 (1.14-1.28) | 1.08 (1.02-1.15) | 1    |         |
| Soft drinks (%)  |                                             |                  |                  |                  |      | <0.001* |
| ≥5 times a week  | 1.90 (1.73-2.09)                            | 1.66 (1.52-1.81) | 1.39 (1.28-1.52) | 1.14 (1.04-1.25) | 1    |         |
| 3-6 times a week | 1.52 (1.41-1.64)                            | 1.49 (1.39-1.60) | 1.35 (1.25-1.45) | 1.15 (1.07-1.24) | 1    |         |

|                     |                  |                  |                  |                  |   |         |
|---------------------|------------------|------------------|------------------|------------------|---|---------|
| 1-2 times a week    | 1.28 (1.20-1.36) | 1.32 (1.25-1.41) | 1.24 (1.17-1.32) | 1.15 (1.08-1.23) | 1 |         |
| Fast food (%)       |                  |                  |                  |                  |   | <0.001* |
| ≥5 times a week     | 1.26 (.09-1.46)  | 1.21 (1.05-1.39) | 0.94 (0.81-1.09) | 0.81 (0.70-0.94) | 1 |         |
| 3-6 times a week    | 1.45 (1.33-1.58) | 1.51 (1.39-1.64) | 1.29 (1.19-1.40) | 1.06 (0.98-1.16) | 1 |         |
| 1-2 times a week    | 1.33 (1.26-1.41) | 1.38 (1.31-1.46) | 1.30 (1.23-1.37) | 1.13 (1.07-1.19) | 1 |         |
| Instant noodle (%)  |                  |                  |                  |                  |   | <0.001* |
| ≥5 times a week     | 0.66 (0.59-0.75) | 0.71 (0.63-0.80) | 0.87 (0.78-0.97) | 0.93 (0.83-1.05) | 1 |         |
| 3-6 times a week    | 0.67 (0.62-0.73) | 0.85 (0.79-0.91) | 1.03 (0.95-1.10) | 1.15 (1.07-1.24) | 1 |         |
| 1-2 times a week    | 0.79 (0.75-0.84) | 0.95 (0.89-1.00) | 1.05 (0.99-1.11) | 1.11 (1.05-1.18) | 1 |         |
| Confectionaries (%) |                  |                  |                  |                  |   | <0.001* |
| ≥5 times a week     | 1.53 (1.39-1.67) | 1.40 (1.28-1.53) | 1.14 (1.04-1.24) | 1.07 (0.97-1.17) | 1 |         |
| 3-6 times a week    | 1.39 (1.29-1.49) | 1.36 (1.27-1.46) | 1.24 (1.16-1.32) | 1.13 (1.05-1.21) | 1 |         |
| 1-2 times a week    | 1.23 (1.15-1.31) | 1.26 (1.18-1.35) | 1.17 (1.10-1.25) | 1.10 (1.03-1.18) | 1 |         |
| Vegetables (%)      |                  |                  |                  |                  |   | <0.001* |
| ≥5 times a week     | 0.94 (0.84-1.06) | 0.96 (0.85-1.08) | 1.07 (0.95-1.20) | 1.11 (0.98-1.26) | 1 |         |
| 3-6 times a week    | 1.00 (0.89-1.13) | 1.10 (0.97-1.24) | 1.25 (1.11-1.41) | 1.14 (1.00-1.31) | 1 |         |

1  
2  
3  
4  
5  
6  
7  
8  
9  
10  
11  
12  
13  
14  
15  
16  
17  
18  
19  
20  
21  
22  
23  
24  
25  
26  
27  
28  
29  
30  
31  
32  
33  
34  
35  
36  
37  
38  
39  
40  
41  
42  
43  
44  
45  
46

|                  |                  |                  |                  |                  |   |
|------------------|------------------|------------------|------------------|------------------|---|
| 1-2 times a week | 0.98 (0.87-1.11) | 1.12 (0.99-1.28) | 1.25 (1.10-1.43) | 1.19 (1.04-1.37) | 1 |
| Milk (%)         | <0.001*          |                  |                  |                  |   |
| ≥5 times a week  | 0.51 (0.47-0.55) | 0.57 (0.53-0.62) | 0.73 (0.68-0.79) | 0.97 (0.90-1.04) | 1 |
| 3-6 times a week | 0.79 (0.73-0.86) | 0.86 (0.79-0.93) | 1.00 (0.92-1.08) | 1.11 (1.02-1.21) | 1 |
| 1-2 times a week | 0.91 (0.84-0.98) | 0.98 (0.91-1.06) | 1.03 (0.96-1.12) | 1.05 (0.96-1.14) | 1 |

\* Significance at P < 0.05

# Reporting checklist for cross sectional study.

Based on the STROBE cross sectional guidelines.

## Instructions to authors

Complete this checklist by entering the page numbers from your manuscript where readers will find each of the items listed below.

Your article may not currently address all the items on the checklist. Please modify your text to include the missing information. If you are certain that an item does not apply, please write "n/a" and provide a short explanation.

Upload your completed checklist as an extra file when you submit to a journal.

In your methods section, say that you used the STROBE cross sectional reporting guidelines, and cite them as:

von Elm E, Altman DG, Egger M, Pocock SJ, Gotsche PC, Vandenbroucke JP. The Strengthening the Reporting of Observational Studies in Epidemiology (STROBE) Statement: guidelines for reporting observational studies.

|                        |     | Reporting Item                                                                                                                  | Page Number |
|------------------------|-----|---------------------------------------------------------------------------------------------------------------------------------|-------------|
| Title                  | #1a | Indicate the study's design with a commonly used term in the title or the abstract                                              | 1           |
| Abstract               | #1b | Provide in the abstract an informative and balanced summary of what was done and what was found                                 | 3-4         |
| Background / rationale | #2  | Explain the scientific background and rationale for the investigation being reported                                            | 6-7         |
| Objectives             | #3  | State specific objectives, including any prespecified hypotheses                                                                | 7           |
| Study design           | #4  | Present key elements of study design early in the paper                                                                         | 8           |
| Setting                | #5  | Describe the setting, locations, and relevant dates, including periods of recruitment, exposure, follow-up, and data collection | 8           |
| Eligibility criteria   | #6a | Give the eligibility criteria, and the sources and methods of selection of participants.                                        | 8           |

|    |                  |      |                                                                   |       |
|----|------------------|------|-------------------------------------------------------------------|-------|
| 1  |                  | #7   | Clearly define all outcomes, exposures, predictors, potential     | 8-10  |
| 2  |                  |      | confounders, and effect modifiers. Give diagnostic criteria, if   |       |
| 3  |                  |      | applicable                                                        |       |
| 4  |                  |      |                                                                   |       |
| 5  |                  |      |                                                                   |       |
| 6  | Data sources /   | #8   | For each variable of interest give sources of data and details of | 8-10  |
| 7  | measurement      |      | methods of assessment (measurement). Describe                     |       |
| 8  |                  |      | comparability of assessment methods if there is more than one     |       |
| 9  |                  |      | group. Give information separately for for exposed and            |       |
| 10 |                  |      | unexposed groups if applicable.                                   |       |
| 11 |                  |      |                                                                   |       |
| 12 |                  |      |                                                                   |       |
| 13 |                  |      |                                                                   |       |
| 14 | Bias             | #9   | Describe any efforts to address potential sources of bias         | 9-10  |
| 15 |                  |      |                                                                   |       |
| 16 |                  |      |                                                                   |       |
| 17 | Study size       | #10  | Explain how the study size was arrived at                         | 8     |
| 18 |                  |      |                                                                   |       |
| 19 | Quantitative     | #11  | Explain how quantitative variables were handled in the            | 8     |
| 20 | variables        |      | analyses. If applicable, describe which groupings were chosen,    |       |
| 21 |                  |      | and why                                                           |       |
| 22 |                  |      |                                                                   |       |
| 23 |                  |      |                                                                   |       |
| 24 | Statistical      | #12a | Describe all statistical methods, including those used to control | 10-11 |
| 25 | methods          |      | for confounding                                                   |       |
| 26 |                  |      |                                                                   |       |
| 27 |                  |      |                                                                   |       |
| 28 |                  | #12b | Describe any methods used to examine subgroups and                | 8-10  |
| 29 |                  |      | interactions                                                      |       |
| 30 |                  |      |                                                                   |       |
| 31 |                  |      |                                                                   |       |
| 32 |                  | #12c | Explain how missing data were addressed                           | 8     |
| 33 |                  |      |                                                                   |       |
| 34 |                  |      |                                                                   |       |
| 35 |                  | #12d | If applicable, describe analytical methods taking account of      | 8     |
| 36 |                  |      | sampling strategy                                                 |       |
| 37 |                  |      |                                                                   |       |
| 38 |                  |      |                                                                   |       |
| 39 |                  | #12e | Describe any sensitivity analyses                                 | 10-11 |
| 40 |                  |      |                                                                   |       |
| 41 | Participants     | #13a | Report numbers of individuals at each stage of study—eg           | 11-12 |
| 42 |                  |      | numbers potentially eligible, examined for eligibility, confirmed |       |
| 43 |                  |      | eligible, included in the study, completing follow-up, and        |       |
| 44 |                  |      | analysed. Give information separately for for exposed and         |       |
| 45 |                  |      | unexposed groups if applicable.                                   |       |
| 46 |                  |      |                                                                   |       |
| 47 |                  |      |                                                                   |       |
| 48 |                  |      |                                                                   |       |
| 49 |                  | #13b | Give reasons for non-participation at each stage                  | 8     |
| 50 |                  |      |                                                                   |       |
| 51 |                  |      |                                                                   |       |
| 52 |                  | #13c | Consider use of a flow diagram                                    | 8     |
| 53 |                  |      |                                                                   |       |
| 54 | Descriptive data | #14a | Give characteristics of study participants (eg demographic,       | 11-15 |
| 55 |                  |      | clinical, social) and information on exposures and potential      |       |
| 56 |                  |      | confounders. Give information separately for exposed and          |       |
| 57 |                  |      | unexposed groups if applicable.                                   |       |
| 58 |                  |      |                                                                   |       |
| 59 |                  |      |                                                                   |       |
| 60 |                  |      |                                                                   |       |

|    |                  |      |                                                                      |       |
|----|------------------|------|----------------------------------------------------------------------|-------|
| 1  |                  | #14b | Indicate number of participants with missing data for each           | 11-15 |
| 2  |                  |      | variable of interest                                                 |       |
| 3  |                  |      |                                                                      |       |
| 4  |                  |      |                                                                      |       |
| 5  | Outcome data     | #15  | Report numbers of outcome events or summary measures.                | 11-13 |
| 6  |                  |      | Give information separately for exposed and unexposed                |       |
| 7  |                  |      | groups if applicable.                                                |       |
| 8  |                  |      |                                                                      |       |
| 9  |                  |      |                                                                      |       |
| 10 | Main results     | #16a | Give unadjusted estimates and, if applicable, confounder-            | 20-22 |
| 11 |                  |      | adjusted estimates and their precision (eg, 95% confidence           |       |
| 12 |                  |      | interval). Make clear which confounders were adjusted for and        |       |
| 13 |                  |      | why they were included                                               |       |
| 14 |                  |      |                                                                      |       |
| 15 |                  |      |                                                                      |       |
| 16 |                  |      |                                                                      |       |
| 17 |                  | #16b | Report category boundaries when continuous variables were            | 20-22 |
| 18 |                  |      | categorized                                                          |       |
| 19 |                  |      |                                                                      |       |
| 20 |                  |      |                                                                      |       |
| 21 |                  | #16c | If relevant, consider translating estimates of relative risk into    | 20-22 |
| 22 |                  |      | absolute risk for a meaningful time period                           |       |
| 23 |                  |      |                                                                      |       |
| 24 | Other analyses   | #17  | Report other analyses done—e.g., analyses of subgroups and           | 16-19 |
| 25 |                  |      | interactions, and sensitivity analyses                               |       |
| 26 |                  |      |                                                                      |       |
| 27 |                  |      |                                                                      |       |
| 28 | Key results      | #18  | Summarise key results with reference to study objectives             | 22    |
| 29 |                  |      |                                                                      |       |
| 30 |                  |      |                                                                      |       |
| 31 | Limitations      | #19  | Discuss limitations of the study, taking into account sources of     | 24-25 |
| 32 |                  |      | potential bias or imprecision. Discuss both direction and            |       |
| 33 |                  |      | magnitude of any potential bias.                                     |       |
| 34 |                  |      |                                                                      |       |
| 35 |                  |      |                                                                      |       |
| 36 | Interpretation   | #20  | Give a cautious overall interpretation considering objectives,       | 22-24 |
| 37 |                  |      | limitations, multiplicity of analyses, results from similar studies, |       |
| 38 |                  |      | and other relevant evidence.                                         |       |
| 39 |                  |      |                                                                      |       |
| 40 |                  |      |                                                                      |       |
| 41 | Generalisability | #21  | Discuss the generalisability (external validity) of the study        | 25    |
| 42 |                  |      | results                                                              |       |
| 43 |                  |      |                                                                      |       |
| 44 |                  |      |                                                                      |       |
| 45 | Funding          | #22  | Give the source of funding and the role of the funders for the       | 26    |
| 46 |                  |      | present study and, if applicable, for the original study on which    |       |
| 47 |                  |      | the present article is based                                         |       |
| 48 |                  |      |                                                                      |       |
| 49 |                  |      |                                                                      |       |

50 The STROBE checklist is distributed under the terms of the Creative Commons Attribution License  
 51 CC-BY. This checklist was completed on 09. March 2018 using <http://www.goodreports.org/>, a tool  
 52 made by the [EQUATOR Network](#) in collaboration with [Penelope.ai](#)  
 53  
 54  
 55  
 56  
 57  
 58  
 59  
 60
