# Supplementary material for: The association between sleep duration, sleep quality, and food consumption in adolescents: A cross-sectional study using the Korea Youth Risk Behavior Web-based Survey
Source: PubMed Central journal article supplement — BMJ Open. 2018 Jul 24;8(7):e022848. doi: 10.1136/bmjopen-2018-022848 (PMC6059317; doi:10.1136/bmjopen-2018-022848), 2018-07-24
Supplement: bmjopen-2018-022848supp001.pdf [file bmjopen-2018-022848supp001.pdf]

**S1 Table. Quality of sleep rates of participants according to sleep duration.**

| Factors              | Total | Sleep time |      |      |      |      | P-value |
|----------------------|-------|------------|------|------|------|------|---------|
|                      |       | 6(-) h     | 6 h  | 7 h  | 8 h  | 9+ h |         |
| Quality of sleep (%) |       |            |      |      |      |      | <0.001* |
| Good                 | 26.6  | 10.1       | 17.9 | 29.8 | 45.4 | 48.3 |         |
| Moderate             | 32.9  | 25.7       | 35.0 | 37.8 | 33.9 | 29.9 |         |
| Poor                 | 40.5  | 64.2       | 47.0 | 32.4 | 20.7 | 21.8 |         |

\* Chi-square test with Rao-Scott correction, Significance at  $P < 0.05$
