# Supplementary material for: The association between sleep duration, sleep quality, and food consumption in adolescents: A cross-sectional study using the Korea Youth Risk Behavior Web-based Survey
Source: PubMed Central journal article supplement — BMJ Open. 2018 Jul 24;8(7):e022848. doi: 10.1136/bmjopen-2018-022848 (PMC6059317; doi:10.1136/bmjopen-2018-022848), 2018-07-24
Supplement: bmjopen-2018-022848supp002.pdf [file bmjopen-2018-022848supp002.pdf]

**S2 Table. Unadjusted odd ratios of sleep duration for food consumption using multiple logistic regression analysis with complex sampling (Reference of food frequency = 0 time a week).**

| Factors          | AOR (95% Confidence interval) of Sleep time |                  |                  |                  |      | P-value |
|------------------|---------------------------------------------|------------------|------------------|------------------|------|---------|
|                  | 6(-) h                                      | 6 h              | 7 h              | 8 h              | 9+ h |         |
| Fruits (%)       |                                             |                  |                  |                  |      | <0.001* |
| ≥5 times a week  | 0.95 (0.87-1.04)                            | 0.89 (0.82-0.97) | 0.92 (0.84-1.00) | 1.06 (0.97-1.16) | 1    |         |
| 3-6 times a week | 1.06 (0.97-1.16)                            | 1.09 (0.99-1.19) | 1.07 (0.98-1.18) | 1.15 (1.04-1.26) | 1    |         |
| 1-2 times a week | 1.13 (1.03-1.24)                            | 1.14 (1.05-1.25) | 1.11 (1.01-1.21) | 1.04 (0.95-1.14) | 1    |         |
| Soda (%)         |                                             |                  |                  |                  |      | <0.001* |
| ≥5 times a week  | 1.07 (0.96-1.20)                            | 1.12 (1.02-1.24) | 1.14 (1.04-1.26) | 1.01 (0.92-1.12) | 1    |         |
| 3-6 times a week | 1.02 (0.94-1.10)                            | 1.20 (1.12-1.29) | 1.25 (1.17-1.33) | 1.10 (1.02-1.18) | 1    |         |
| 1-2 times a week | 1.02 (0.96-1.08)                            | 1.14 (1.08-1.21) | 1.21 (1.14-1.28) | 1.08 (1.02-1.15) | 1    |         |
| Soft drinks (%)  |                                             |                  |                  |                  |      | <0.001* |
| ≥5 times a week  | 1.90 (1.73-2.09)                            | 1.66 (1.52-1.81) | 1.39 (1.28-1.52) | 1.14 (1.04-1.25) | 1    |         |
| 3-6 times a week | 1.52 (1.41-1.64)                            | 1.49 (1.39-1.60) | 1.35 (1.25-1.45) | 1.15 (1.07-1.24) | 1    |         |

|                     |                  |                  |                  |                  |   |         |
|---------------------|------------------|------------------|------------------|------------------|---|---------|
| 1-2 times a week    | 1.28 (1.20-1.36) | 1.32 (1.25-1.41) | 1.24 (1.17-1.32) | 1.15 (1.08-1.23) | 1 |         |
| Fast food (%)       |                  |                  |                  |                  |   | <0.001* |
| ≥5 times a week     | 1.26 (.09-1.46)  | 1.21 (1.05-1.39) | 0.94 (0.81-1.09) | 0.81 (0.70-0.94) | 1 |         |
| 3-6 times a week    | 1.45 (1.33-1.58) | 1.51 (1.39-1.64) | 1.29 (1.19-1.40) | 1.06 (0.98-1.16) | 1 |         |
| 1-2 times a week    | 1.33 (1.26-1.41) | 1.38 (1.31-1.46) | 1.30 (1.23-1.37) | 1.13 (1.07-1.19) | 1 |         |
| Instant noodle (%)  |                  |                  |                  |                  |   | <0.001* |
| ≥5 times a week     | 0.66 (0.59-0.75) | 0.71 (0.63-0.80) | 0.87 (0.78-0.97) | 0.93 (0.83-1.05) | 1 |         |
| 3-6 times a week    | 0.67 (0.62-0.73) | 0.85 (0.79-0.91) | 1.03 (0.95-1.10) | 1.15 (1.07-1.24) | 1 |         |
| 1-2 times a week    | 0.79 (0.75-0.84) | 0.95 (0.89-1.00) | 1.05 (0.99-1.11) | 1.11 (1.05-1.18) | 1 |         |
| Confectionaries (%) |                  |                  |                  |                  |   | <0.001* |
| ≥5 times a week     | 1.53 (1.39-1.67) | 1.40 (1.28-1.53) | 1.14 (1.04-1.24) | 1.07 (0.97-1.17) | 1 |         |
| 3-6 times a week    | 1.39 (1.29-1.49) | 1.36 (1.27-1.46) | 1.24 (1.16-1.32) | 1.13 (1.05-1.21) | 1 |         |
| 1-2 times a week    | 1.23 (1.15-1.31) | 1.26 (1.18-1.35) | 1.17 (1.10-1.25) | 1.10 (1.03-1.18) | 1 |         |
| Vegetables (%)      |                  |                  |                  |                  |   | <0.001* |
| ≥5 times a week     | 0.94 (0.84-1.06) | 0.96 (0.85-1.08) | 1.07 (0.95-1.20) | 1.11 (0.98-1.26) | 1 |         |
| 3-6 times a week    | 1.00 (0.89-1.13) | 1.10 (0.97-1.24) | 1.25 (1.11-1.41) | 1.14 (1.00-1.31) | 1 |         |

|                  |                  |                  |                  |                  |         |
|------------------|------------------|------------------|------------------|------------------|---------|
| 1-2 times a week | 0.98 (0.87-1.11) | 1.12 (0.99-1.28) | 1.25 (1.10-1.43) | 1.19 (1.04-1.37) | 1       |
| Milk (%)         |                  |                  |                  |                  | <0.001* |
| ≥5 times a week  | 0.51 (0.47-0.55) | 0.57 (0.53-0.62) | 0.73 (0.68-0.79) | 0.97 (0.90-1.04) | 1       |
| 3-6 times a week | 0.79 (0.73-0.86) | 0.86 (0.79-0.93) | 1.00 (0.92-1.08) | 1.11 (1.02-1.21) | 1       |
| 1-2 times a week | 0.91 (0.84-0.98) | 0.98 (0.91-1.06) | 1.03 (0.96-1.12) | 1.05 (0.96-1.14) | 1       |

\* Significance at  $P < 0.05$
